# Supplementary material for: Genome Mining of Marine-Derived Streptomyces sp. SCSIO 40010 Leads to Cytotoxic New Polycyclic Tetramate Macrolactams
Source: PubMed Central journal article supplement (PMC6950151; doi:10.3390/md17120663), 2019-11-25

## Supplementary Materials

# Genome Mining of Marine-derived *Streptomyces* sp. SCSIO 40010 Leads to New Polycyclic Tetramate Macrolactams

Wei Liu <sup>1,2</sup>, Wenjun Zhang <sup>2</sup>, Hongbo Jin <sup>2</sup>, Qingbo Zhang <sup>2</sup>, Yuchan Chen <sup>3</sup>, Xiaodong Jiang <sup>2</sup>, Guangtao Zhang <sup>2</sup>, Liping Zhang <sup>2</sup>, Weimin Zhang <sup>3</sup>, Zhigang She <sup>1</sup>, Changsheng Zhang <sup>2\*</sup>

- <sup>1</sup> South China Sea Resource Exploitation and Protection Collaborative Innovation Center (SCS-REPIC)/School of Marine Sciences, Sun Yat-sen University, Guangzhou 510006, China; 448242066@qq.com (W.L.); ceshzhg@mail.sysu.edu.cn (Z.S.);
  - <sup>2</sup> CAS Key Laboratory of Tropical Marine Bio-resources and Ecology, Guangdong Key Laboratory of Marine Materia Medica, South China Sea Institute of Oceanology, Innovation Academy for South China Sea Ecology and Environmental Engineering, Chinese Academy of Sciences, 164 West Xingang Road, Guangzhou 510301, China; wzhang@scsio.ac.cn (W.Z.); khbmail@126.com (H.J.); zhanglp@scsio.ac.cn (L.Z.); gtzhang@scsio.ac.cn (G.Z.); gudaobo@163.com (Q.Z.); czhang2006@gmail.com (C.Z.)
  - <sup>3</sup> State Key Laboratory of Applied Microbiology Southern China, Guangdong Institute of Microbiology, 100 Central Xianlie Road, Guangzhou 510070, China; chenyc@gdim.cn (Y.C.); wmzhang@gdim.cn (W.Z.)
- \* Correspondence: czhang2006@gmail.com; Tel.: +86-20-8902-3038 (C.Z.)

## Content

|                                                                                                                                |            |
|--------------------------------------------------------------------------------------------------------------------------------|------------|
| <b>Figure S1.</b> HPLC analysis of metabolite profiles of <i>Streptomyces</i> sp. SCSIO 40010 cultured in different media..... | <b>S4</b>  |
| <b>Figure S2.</b> HRESIMS (a) and IR(b) of compound <b>1</b> .....                                                             | <b>S5</b>  |
| <b>Figure S3.</b> <sup>1</sup> H NMR spectrum of compound <b>1</b> in DMSO- <i>d</i> <sub>6</sub> .....                        | <b>S6</b>  |
| <b>Figure S4.</b> The <sup>13</sup> C NMR and DEPT 135 spectra of compound <b>1</b> in DMSO- <i>d</i> <sub>6</sub> .....       | <b>S7</b>  |
| <b>Figure S5.</b> The HSQC spectrum of compound <b>1</b> in DMSO- <i>d</i> <sub>6</sub> .....                                  | <b>S8</b>  |
| <b>Figure S6.</b> The HMBC spectrum of compound <b>1</b> in DMSO- <i>d</i> <sub>6</sub> .....                                  | <b>S9</b>  |
| <b>Figure S7.</b> The <sup>1</sup> H- <sup>1</sup> H COSY spectrum of compound <b>1</b> in DMSO- <i>d</i> <sub>6</sub> .....   | <b>S10</b> |
| <b>Figure S8.</b> The NOESY spectrum of compound <b>1</b> in DMSO- <i>d</i> <sub>6</sub> .....                                 | <b>S11</b> |
| <b>Figure S9.</b> The key NOESY spectrum of compound <b>1</b> in DMSO- <i>d</i> <sub>6</sub> .....                             | <b>S12</b> |
| <b>Figure S10.</b> Comparison of ECD spectra of compound <b>1-6</b> and the known compounds.....                               | <b>S13</b> |
| <b>Figure S11.</b> HRESIMS (a) and IR(b) of compound <b>2</b> .....                                                            | <b>S14</b> |
| <b>Figure S12.</b> <sup>1</sup> H NMR spectrum of compound <b>2</b> in DMSO- <i>d</i> <sub>6</sub> .....                       | <b>S15</b> |
| <b>Figure S13.</b> The <sup>13</sup> C NMR and DEPT 135 spectra of compound <b>2</b> in DMSO- <i>d</i> <sub>6</sub> .....      | <b>S16</b> |
| <b>Figure S14.</b> The HSQC spectrum of compound <b>2</b> in DMSO- <i>d</i> <sub>6</sub> .....                                 | <b>S17</b> |
| <b>Figure S15.</b> The HMBC spectrum of compound <b>2</b> in DMSO- <i>d</i> <sub>6</sub> .....                                 | <b>S18</b> |
| <b>Figure S16.</b> The <sup>1</sup> H- <sup>1</sup> H COSY spectrum of compound <b>2</b> in DMSO- <i>d</i> <sub>6</sub> .....  | <b>S19</b> |
| <b>Figure S17.</b> The NOESY spectrum of compound <b>2</b> in DMSO- <i>d</i> <sub>6</sub> .....                                | <b>S20</b> |
| <b>Figure S18.</b> The key NOESY spectrum of compound <b>2</b> in DMSO- <i>d</i> <sub>6</sub> .....                            | <b>S21</b> |
| <b>Figure S19.</b> HRESIMS (a) and IR(b) of compound <b>3</b> .....                                                            | <b>S22</b> |
| <b>Figure S20.</b> <sup>1</sup> H NMR spectrum of compound <b>3</b> in DMSO- <i>d</i> <sub>6</sub> .....                       | <b>S23</b> |
| <b>Figure S21.</b> The <sup>13</sup> C NMR and DEPT 135 spectra of compound <b>3</b> in DMSO- <i>d</i> <sub>6</sub> .....      | <b>S24</b> |
| <b>Figure S22.</b> The HSQC spectrum of compound <b>3</b> in DMSO- <i>d</i> <sub>6</sub> .....                                 | <b>S25</b> |
| <b>Figure S23.</b> The HMBC spectrum of compound <b>3</b> in DMSO- <i>d</i> <sub>6</sub> .....                                 | <b>S26</b> |
| <b>Figure S24.</b> The <sup>1</sup> H- <sup>1</sup> H COSY spectrum of compound <b>3</b> in DMSO- <i>d</i> <sub>6</sub> .....  | <b>S27</b> |
| <b>Figure S25.</b> The NOESY spectrum of compound <b>3</b> in DMSO- <i>d</i> <sub>6</sub> .....                                | <b>S28</b> |
| <b>Figure S26.</b> The key NOESY spectrum of compound <b>3</b> in DMSO- <i>d</i> <sub>6</sub> .....                            | <b>S29</b> |
| <b>Figure S27.</b> HRESIMS (a) and IR(b) of compound <b>4</b> .....                                                            | <b>S30</b> |
| <b>Figure S28.</b> <sup>1</sup> H NMR spectrum of compound <b>4</b> in DMSO- <i>d</i> <sub>6</sub> .....                       | <b>S31</b> |
| <b>Figure S29.</b> The <sup>13</sup> C NMR and DEPT 135 spectra of compound <b>4</b> in DMSO- <i>d</i> <sub>6</sub> .....      | <b>S32</b> |
| <b>Figure S30.</b> The HSQC spectrum of compound <b>4</b> in DMSO- <i>d</i> <sub>6</sub> .....                                 | <b>S33</b> |
| <b>Figure S31.</b> The HMBC spectrum of compound <b>4</b> in DMSO- <i>d</i> <sub>6</sub> .....                                 | <b>S34</b> |

|                                                                                                                   |            |
|-------------------------------------------------------------------------------------------------------------------|------------|
| <b>Figure S32.</b> The $^1\text{H}$ - $^1\text{H}$ HCOSY spectrum of compound <b>4</b> in $\text{DMSO-}d_6$ ..... | <b>S35</b> |
| <b>Figure S33.</b> The NOESY spectrum of compound <b>4</b> in $\text{DMSO-}d_6$ .....                             | <b>S36</b> |
| <b>Figure S34.</b> The key NOESY spectrum of compound <b>4</b> in $\text{DMSO-}d_6$ .....                         | <b>S37</b> |
| <b>Figure S35.</b> HRESIMS (a) and IR(b) of compound <b>5</b> .....                                               | <b>S38</b> |
| <b>Figure S36.</b> $^1\text{H}$ NMR spectrum of compound <b>5</b> in $\text{DMSO-}d_6$ .....                      | <b>S39</b> |
| <b>Figure S37.</b> The $^{13}\text{C}$ NMR and DEPT 135 spectra of compound <b>5</b> in $\text{DMSO-}d_6$ .....   | <b>S40</b> |
| <b>Figure S38.</b> The HSQC spectrum of compound <b>5</b> in $\text{DMSO-}d_6$ .....                              | <b>S41</b> |
| <b>Figure S39.</b> The HMBC spectrum of compound <b>5</b> in $\text{DMSO-}d_6$ .....                              | <b>S42</b> |
| <b>Figure S40.</b> The $^1\text{H}$ - $^1\text{H}$ HCOSY spectrum of compound <b>5</b> in $\text{DMSO-}d_6$ ..... | <b>S43</b> |
| <b>Figure S41.</b> The NOESY spectrum of compound <b>5</b> in $\text{DMSO-}d_6$ .....                             | <b>S44</b> |
| <b>Figure S42.</b> The key NOESY spectrum of compound <b>5</b> in $\text{DMSO-}d_6$ .....                         | <b>S45</b> |
| <b>Figure S43.</b> HRESIMS (a) and IR(b) of compound <b>6</b> .....                                               | <b>S46</b> |
| <b>Figure S44.</b> $^1\text{H}$ NMR spectrum of compound <b>6</b> in $\text{DMSO-}d_6$ .....                      | <b>S47</b> |
| <b>Figure S45.</b> The $^{13}\text{C}$ NMR and DEPT 135 spectra of compound <b>6</b> in $\text{DMSO-}d_6$ .....   | <b>S48</b> |
| <b>Figure S46.</b> The HSQC spectrum of compound <b>6</b> in $\text{DMSO-}d_6$ .....                              | <b>S49</b> |
| <b>Figure S47.</b> The HMBC spectrum of compound <b>6</b> in $\text{DMSO-}d_6$ .....                              | <b>S50</b> |
| <b>Figure S48.</b> The $^1\text{H}$ - $^1\text{H}$ HCOSY spectrum of compound <b>6</b> in $\text{DMSO-}d_6$ ..... | <b>S51</b> |
| <b>Figure S49.</b> The NOESY spectrum of compound <b>6</b> in $\text{DMSO-}d_6$ .....                             | <b>S52</b> |
| <b>Figure S50.</b> The key NOESY spectrum of compound <b>6</b> in $\text{DMSO-}d_6$ .....                         | <b>S53</b> |

**Figure S1.** HPLC analysis of metabolite profiles of *Streptomyces* sp. SCSIO 40010 cultured in different media.

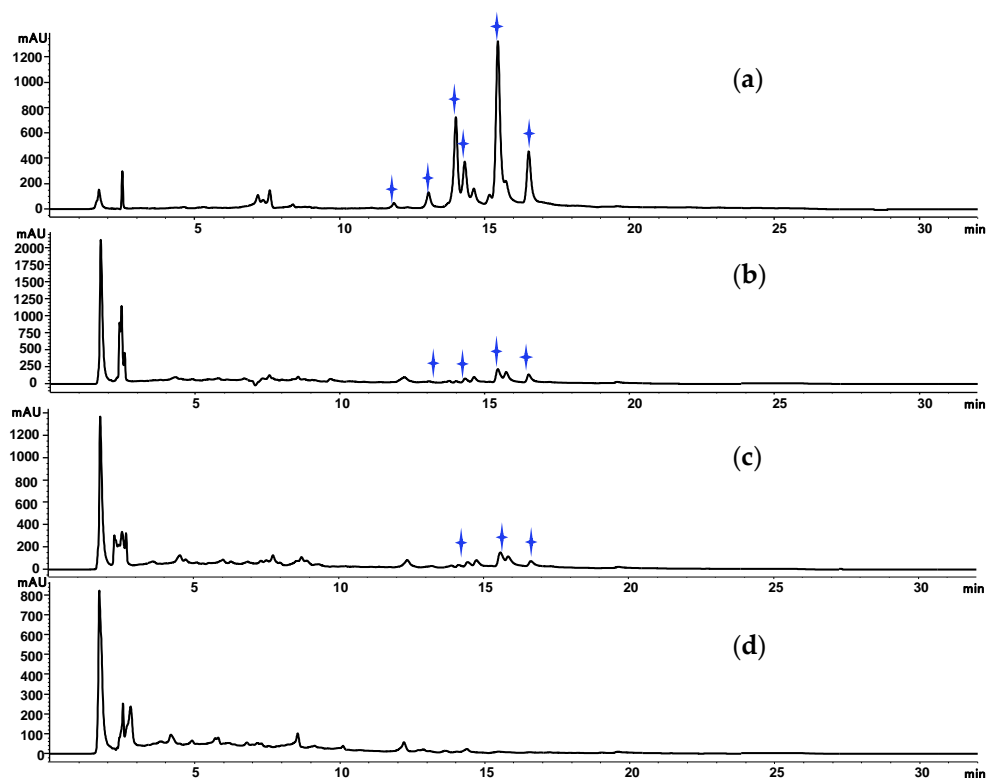

Note: blue star-PTM analogue. (a) modified-A1BFe+C (soluble starch 1.0%, yeast extract 0.4%, tryptone 0.2%,  $\text{CaCO}_3$  0.2%, sea salts 3%, pH 7.2–7.4); (b) AM6 medium (soluble starch 2.0%, glucose 1.0%, tryptone 0.5%, yeast extract 0.5%,  $\text{CaCO}_3$  0.2%, sea salts 3%, pH 7.2–7.4); (c) AM6-4 (glycerol 0.1%, bacterial peptone 0.5%, glycine 0.01%, alanine 0.01%,  $\text{CaCO}_3$  0.5%, sea salts 3%, pH 7.2–7.4). (d) Modified-ISP3 (oat meal 1.5%,  $\text{FeSO}_4$  0.0001%,  $\text{MnCl}_2$  0.0001%,  $\text{ZnSO}_4$  0.0001%, sea salts 3%, pH 7.2–7.4).

Figure S2. HRESIMS (a) and IR(b) of compound 1.

(a) HRESIMS

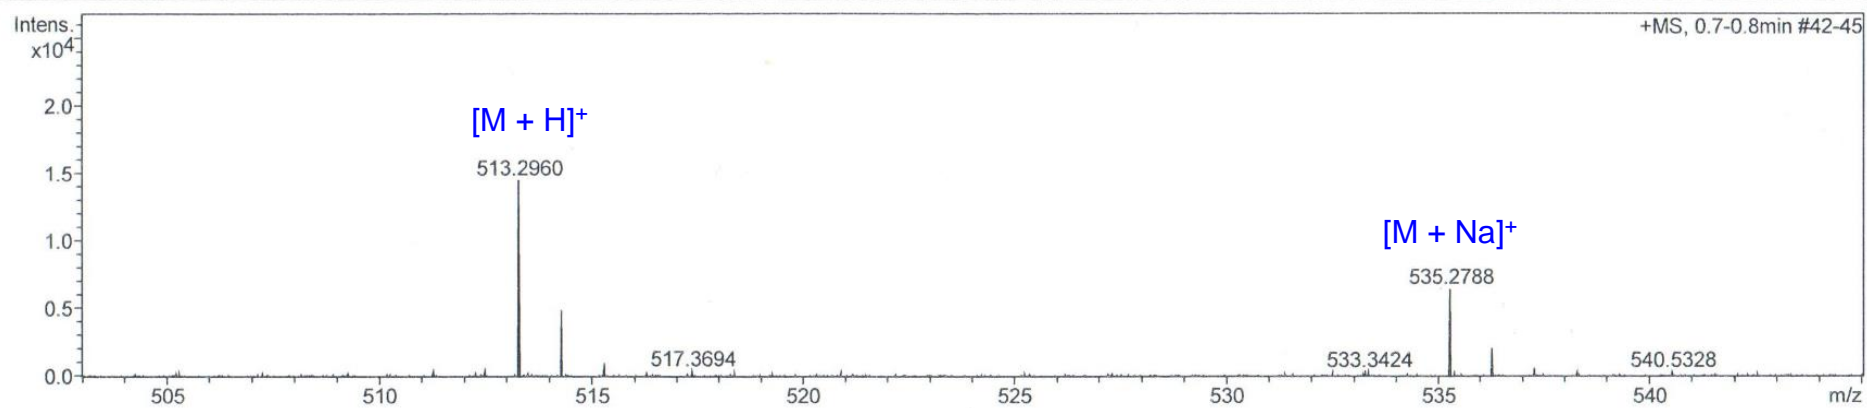

(b) IR

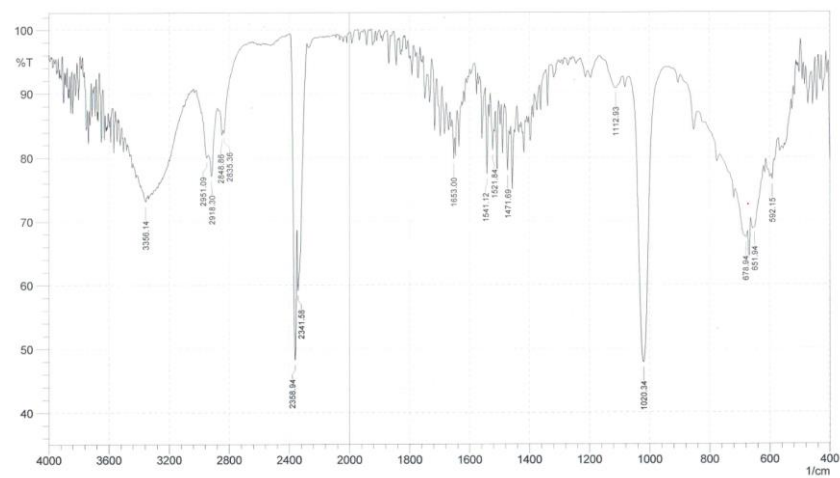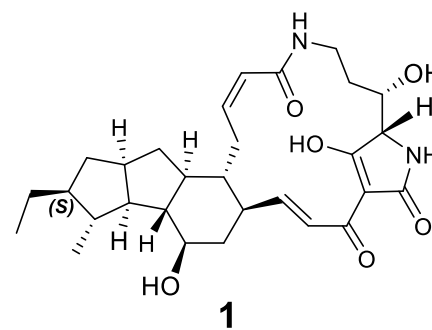

Chemical Formula: C<sub>29</sub>H<sub>40</sub>N<sub>2</sub>O<sub>6</sub>  
calculated for [M+H]<sup>+</sup>: 513.2965  
calculated for [M+Na]<sup>+</sup>: 535.2784

Figure S3.  $^1\text{H}$  NMR spectrum of compound **1** in  $\text{DMSO-}d_6$ .

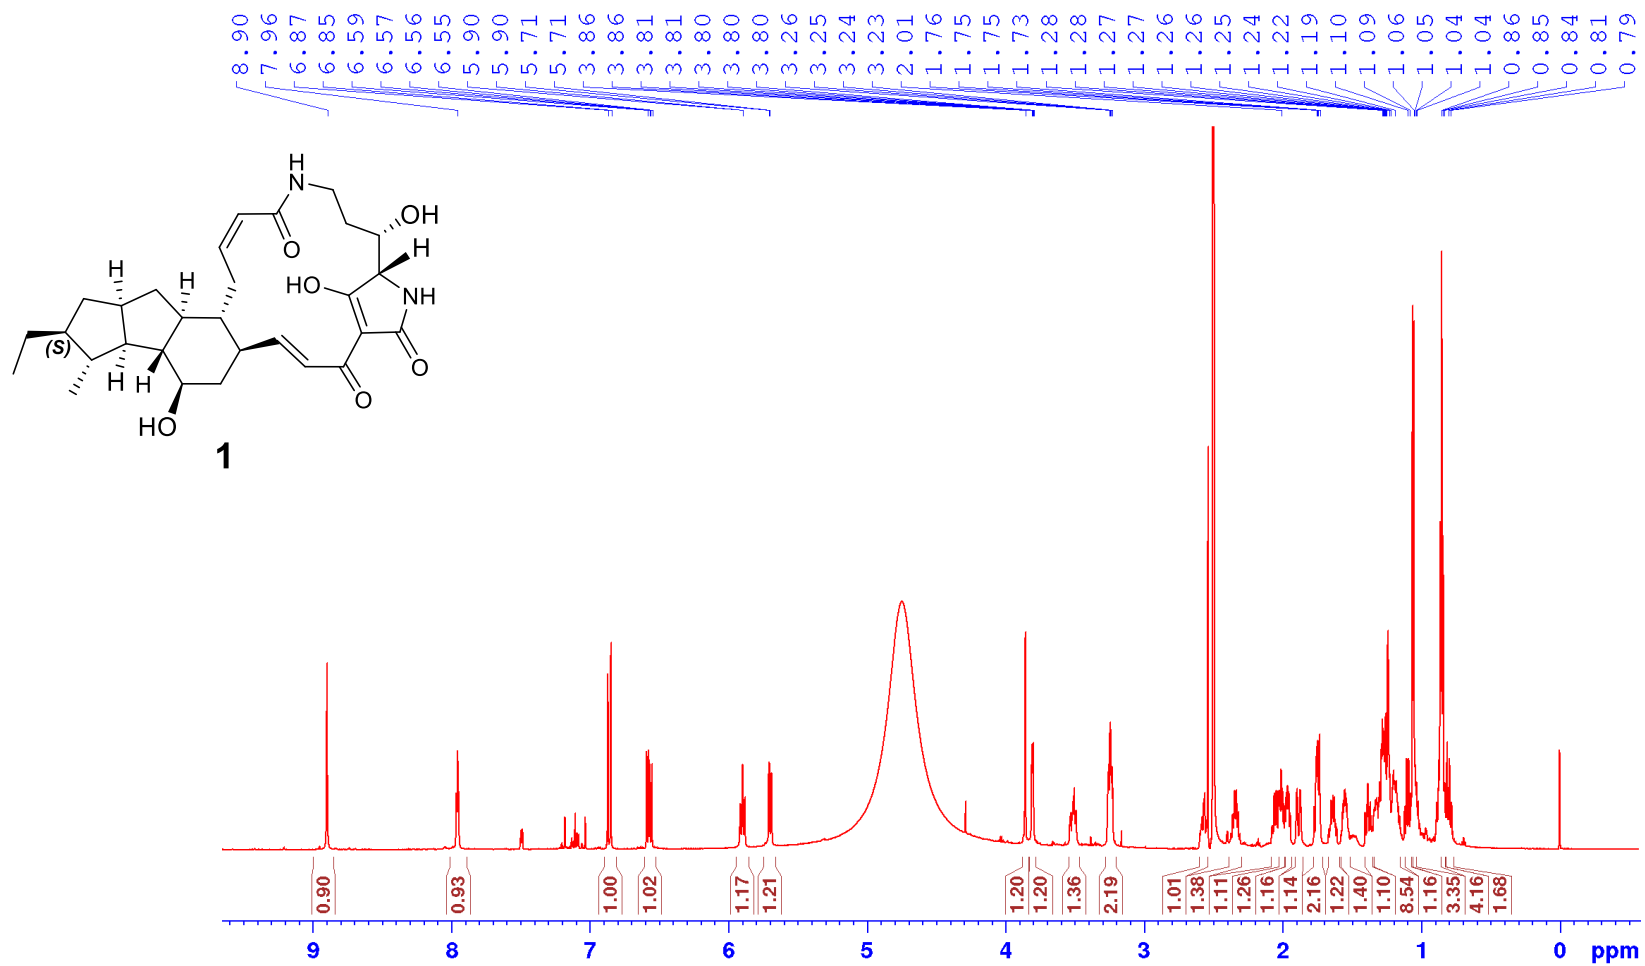

**Figure S4.** The  $^{13}\text{C}$  NMR and DEPT 135 spectra of compound **1** in  $\text{DMSO-}d_6$ .

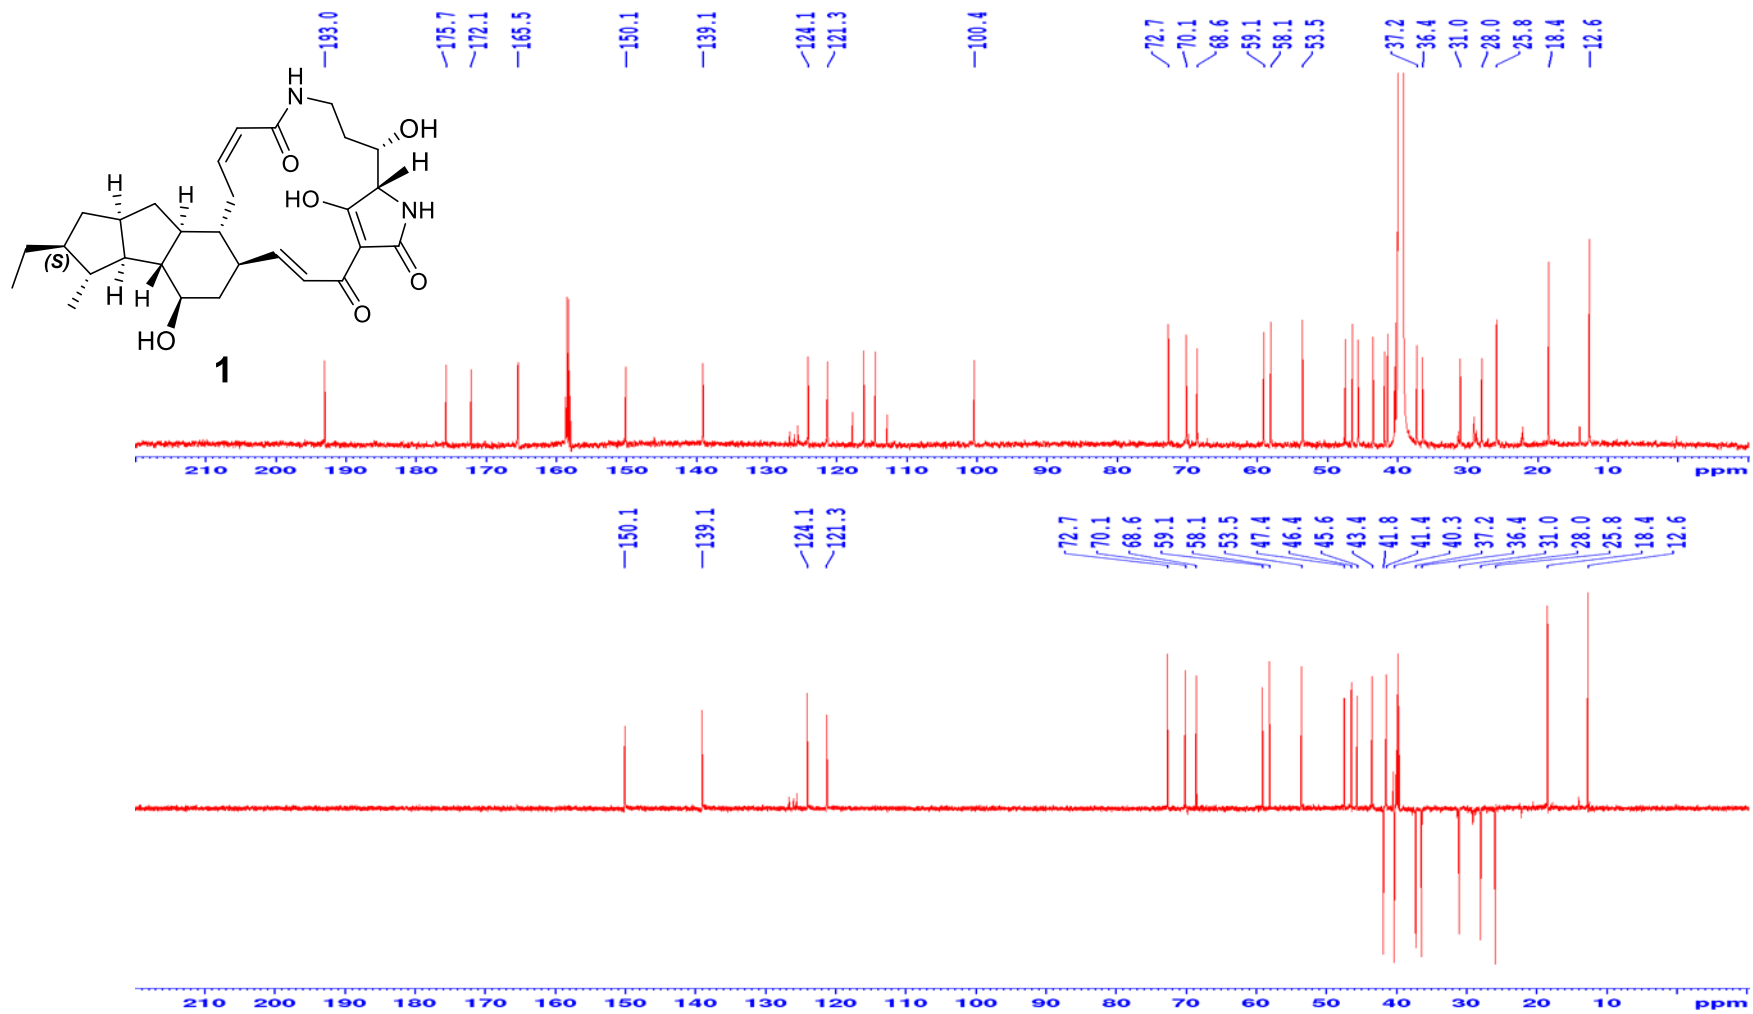

**Figure S5.** The HSQC spectrum of compound **1** in DMSO-*d*<sub>6</sub>.

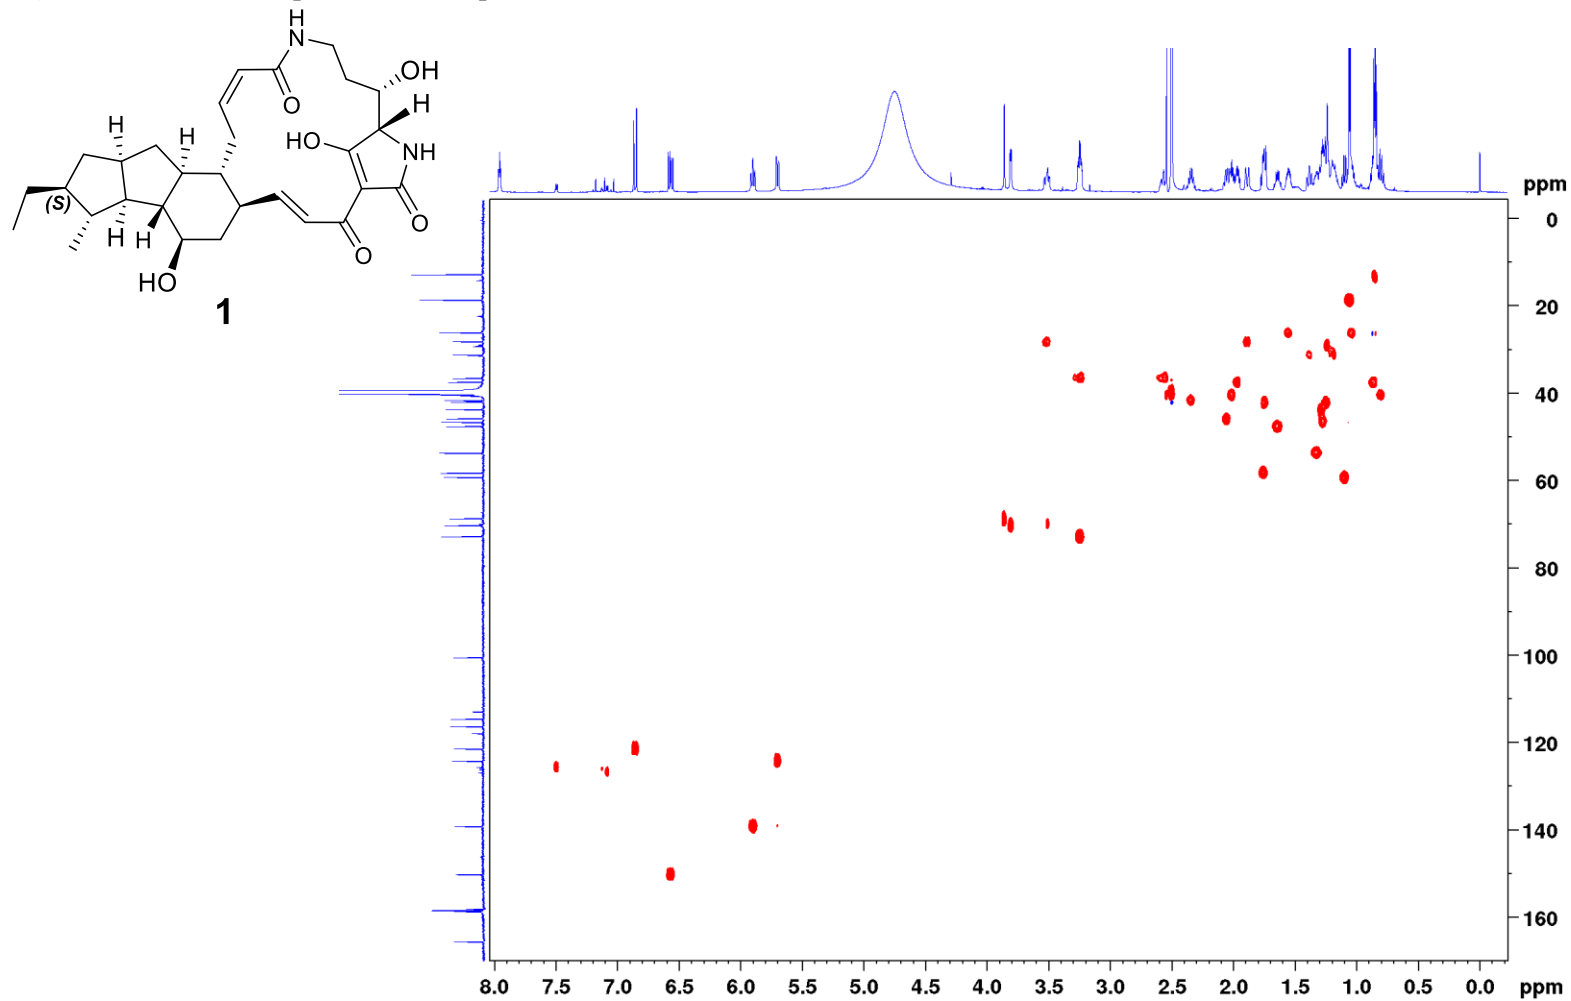



**Figure S6.** The HMBC spectrum of compound **1** in DMSO-*d*<sub>6</sub>.

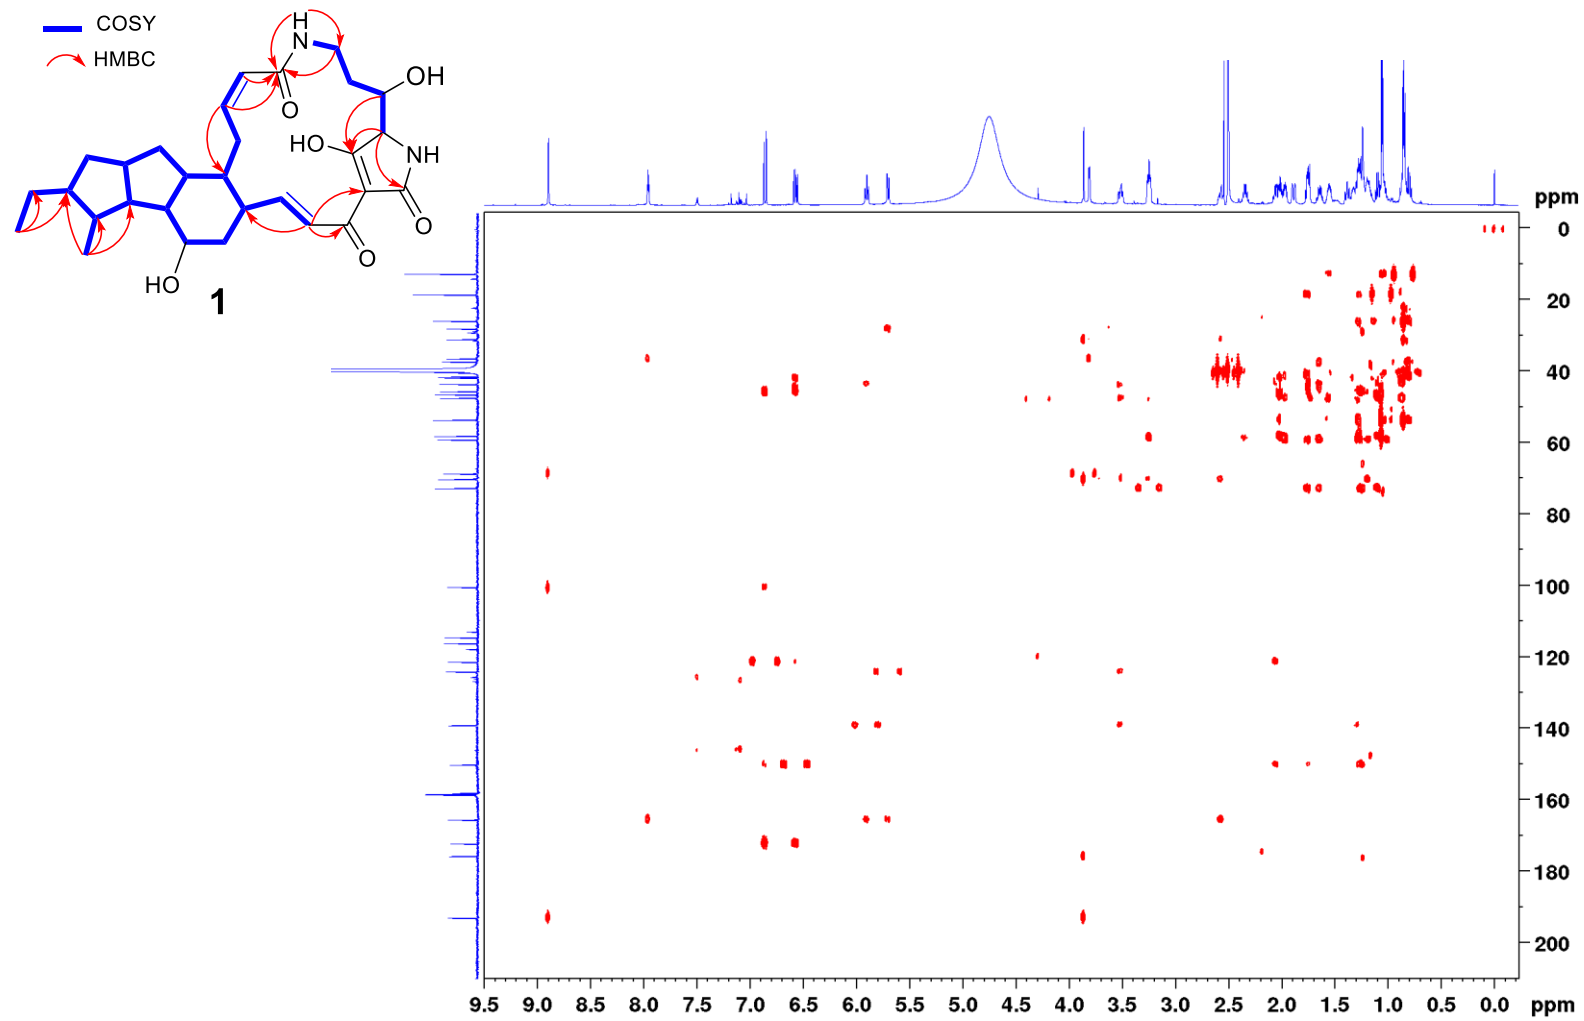

**Figure S7.** The  $^1\text{H}$ - $^1\text{H}$ COSY spectrum of compound **1** in  $\text{DMSO-}d_6$ .

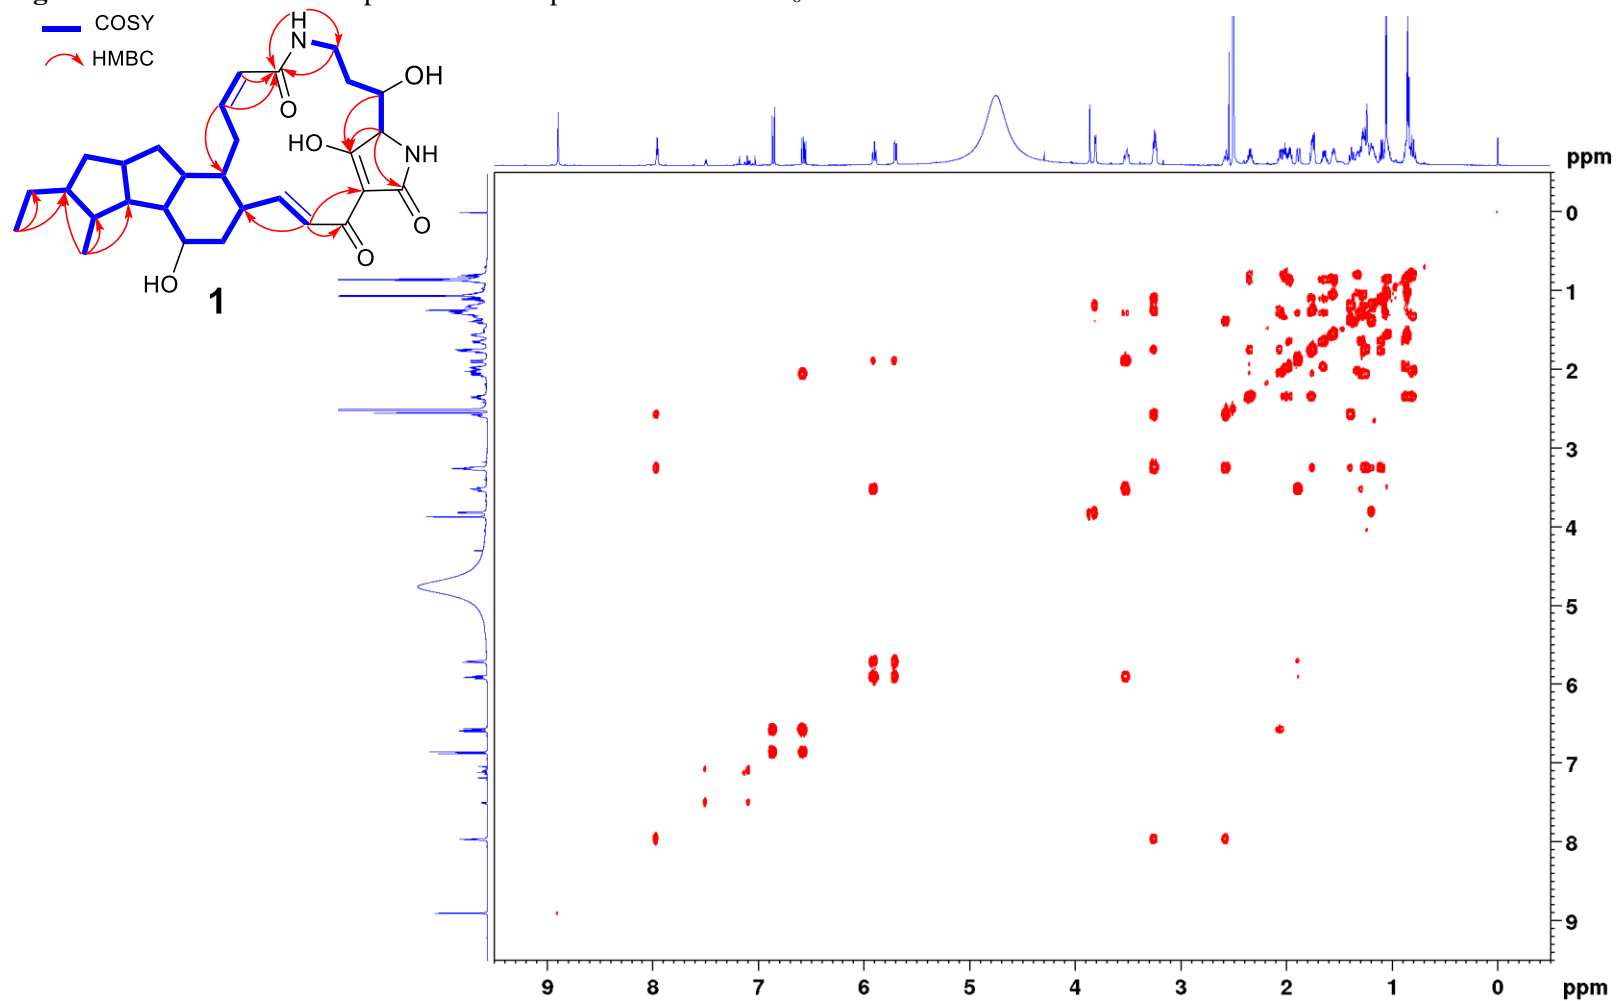



**Figure S9.** The key NOESY spectrum of compound **1** in DMSO- $d_6$ .

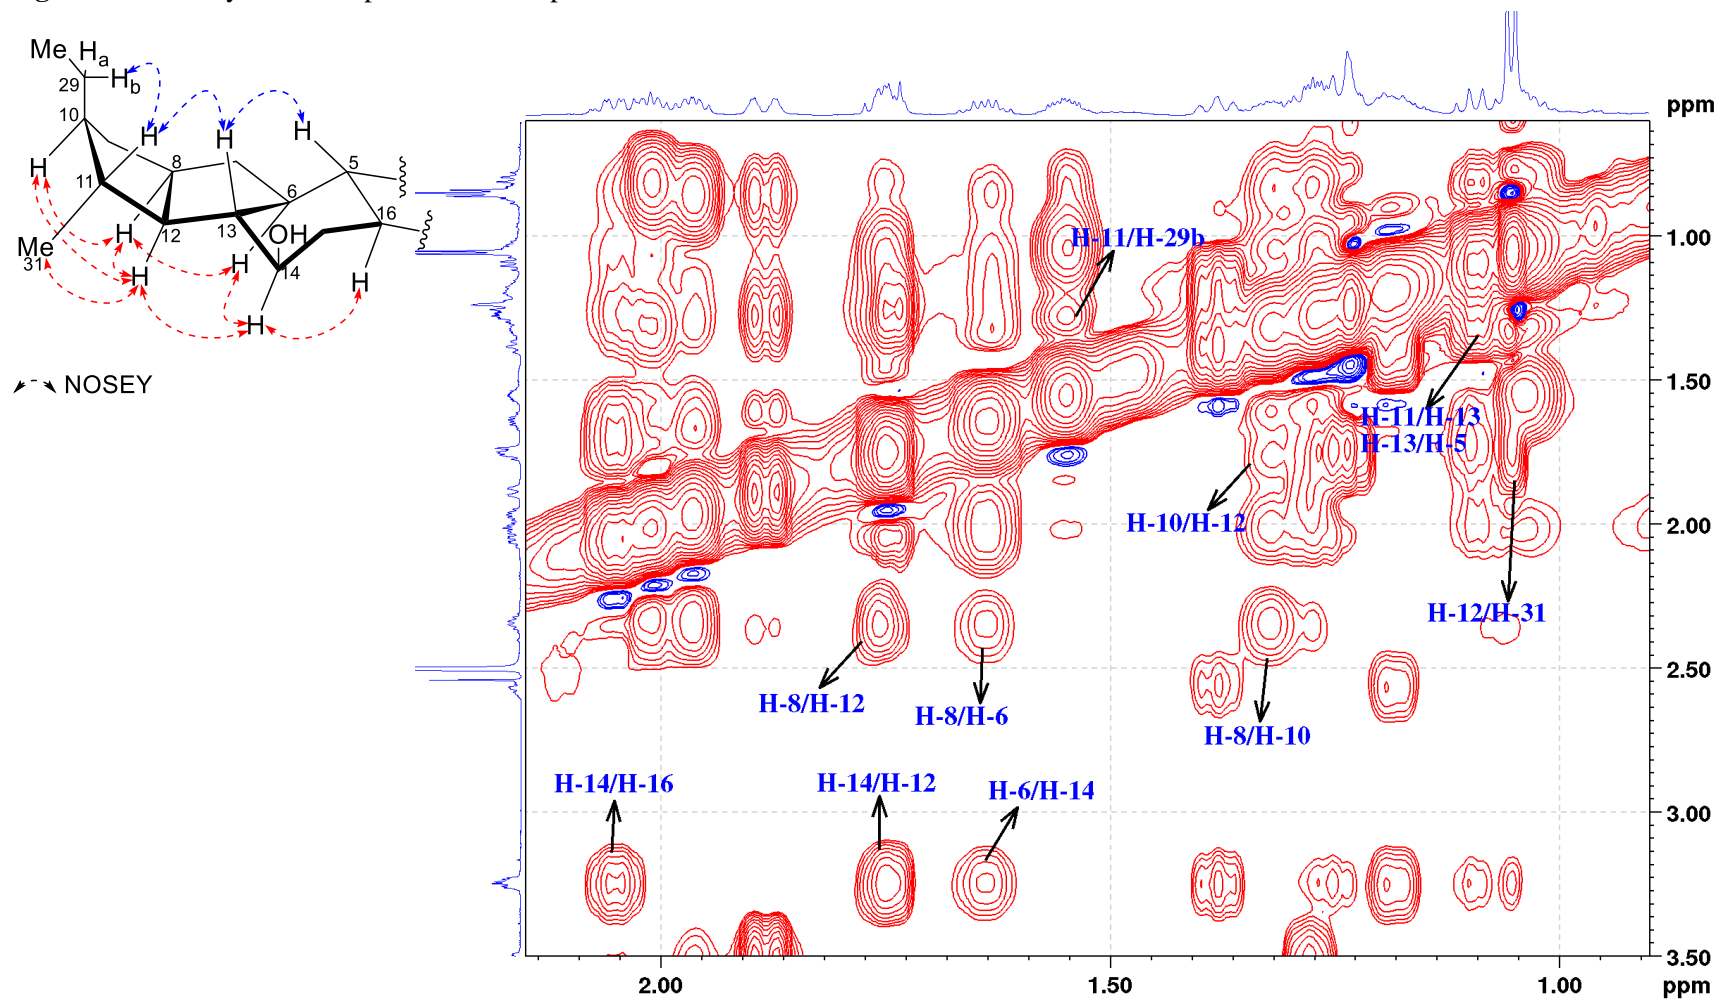

**Figure S10.** Comparison of ECD spectra of compound 1-6 and the known compounds.

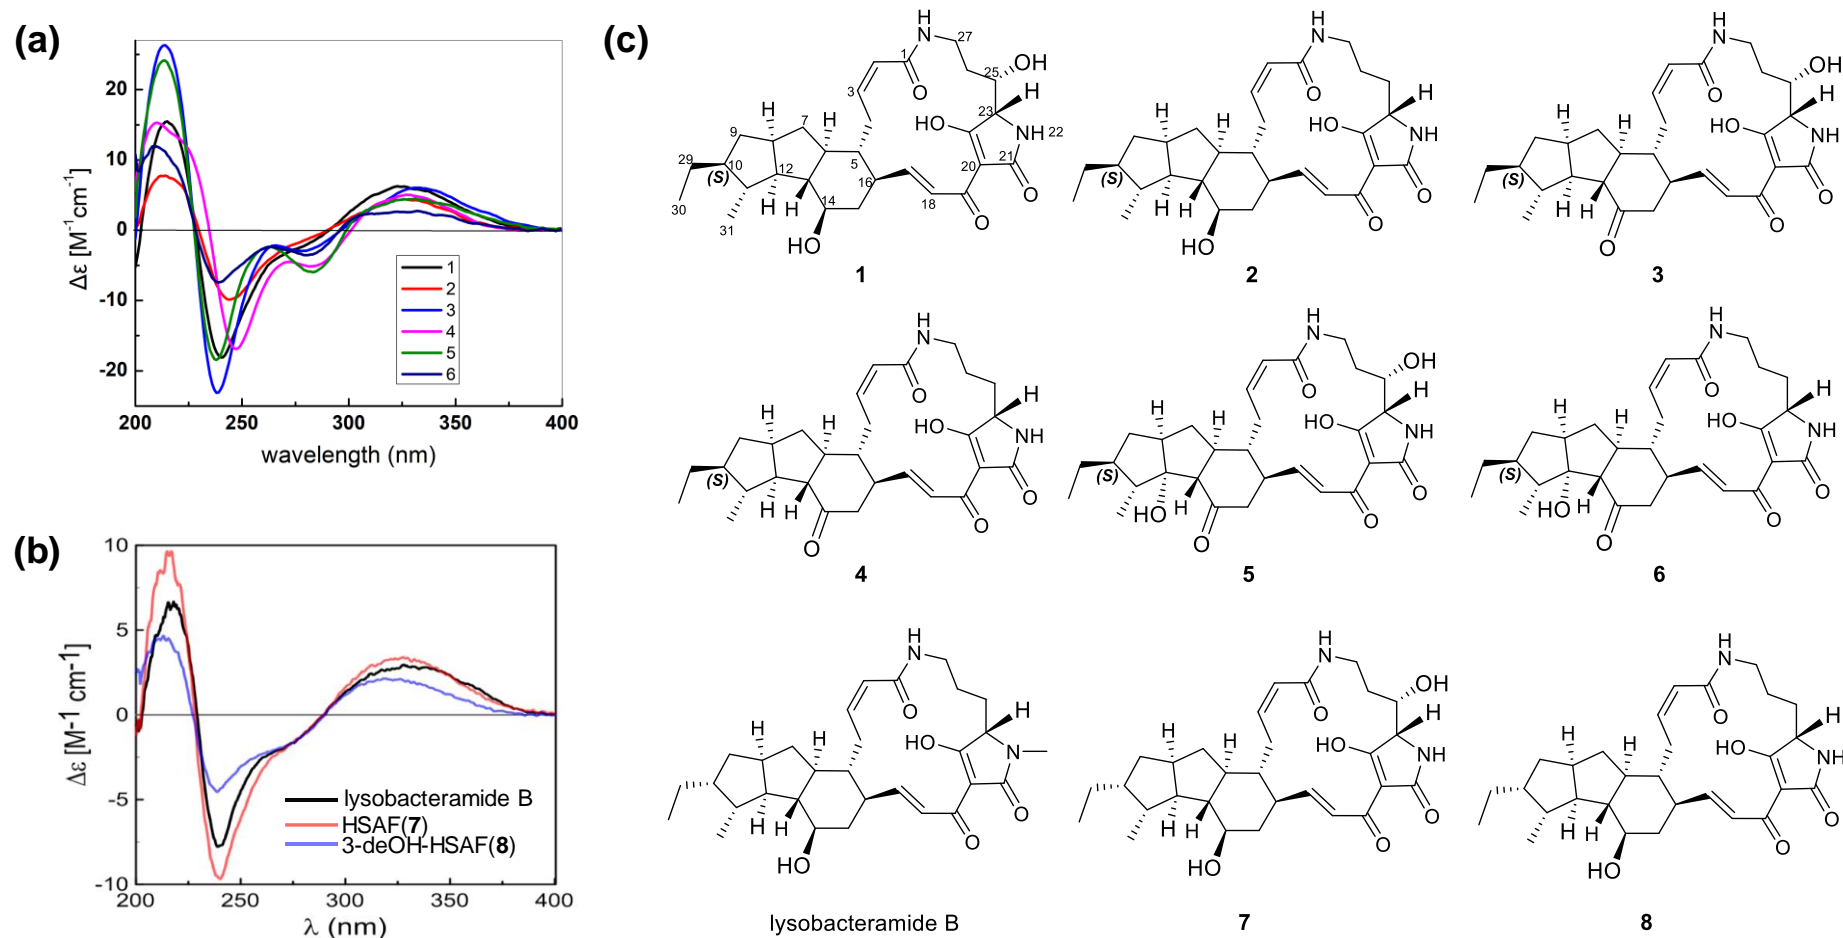

Note: (a) ECD spectra measured for compound 1-6; (b) ECD spectra of lysobacteramide B, HSAF and 3-deOH-HSAF from reference; (c) Chemical structures.

**Figure S11.** HRESIMS (a) and IR(b) of compound **2**.

**(a) HRESIMS**

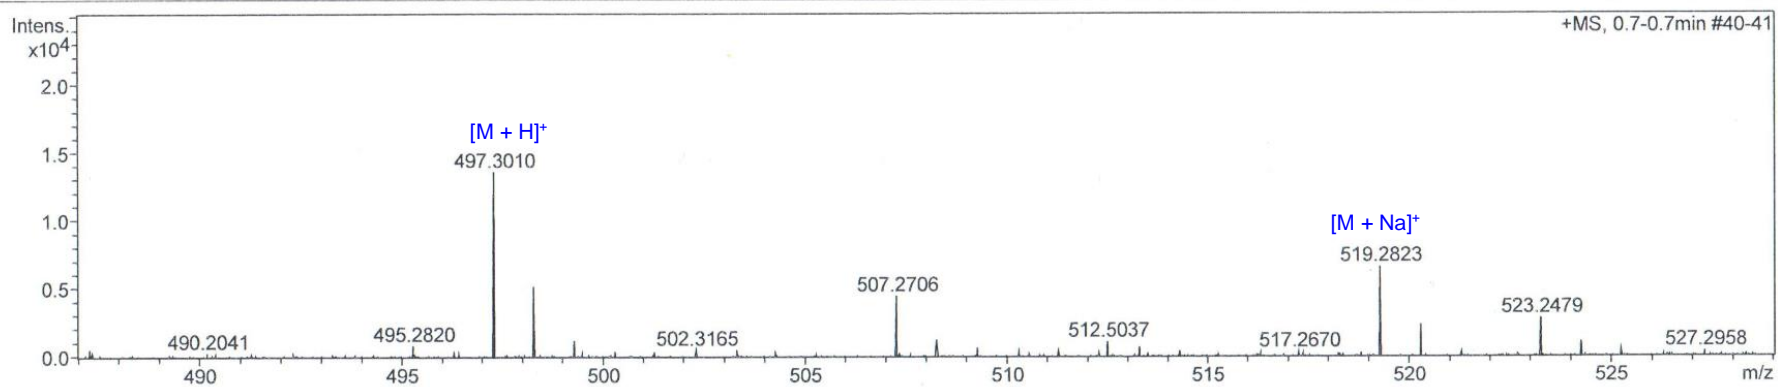

**(b) IR**

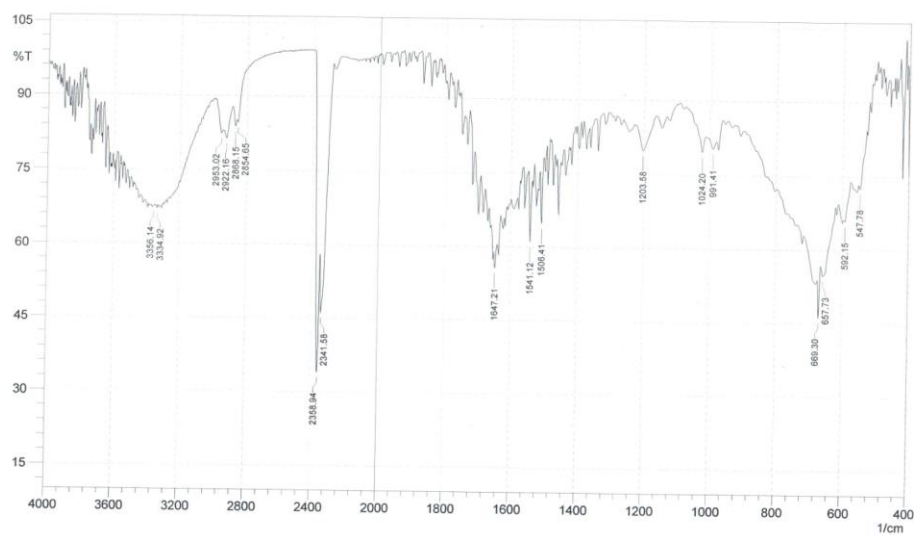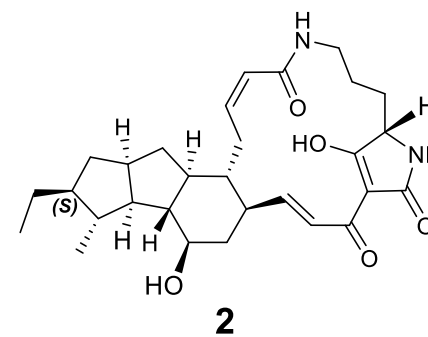

Chemical Formula: C<sub>29</sub>H<sub>40</sub>N<sub>2</sub>O<sub>5</sub>

calculated for [M+H]<sup>+</sup>: 497.3015

calculated for [M+Na]<sup>+</sup>: 519.2835

Figure S12. The  $^1\text{H}$  NMR spectrum of compound **2** in  $\text{DMSO-}d_6$ .

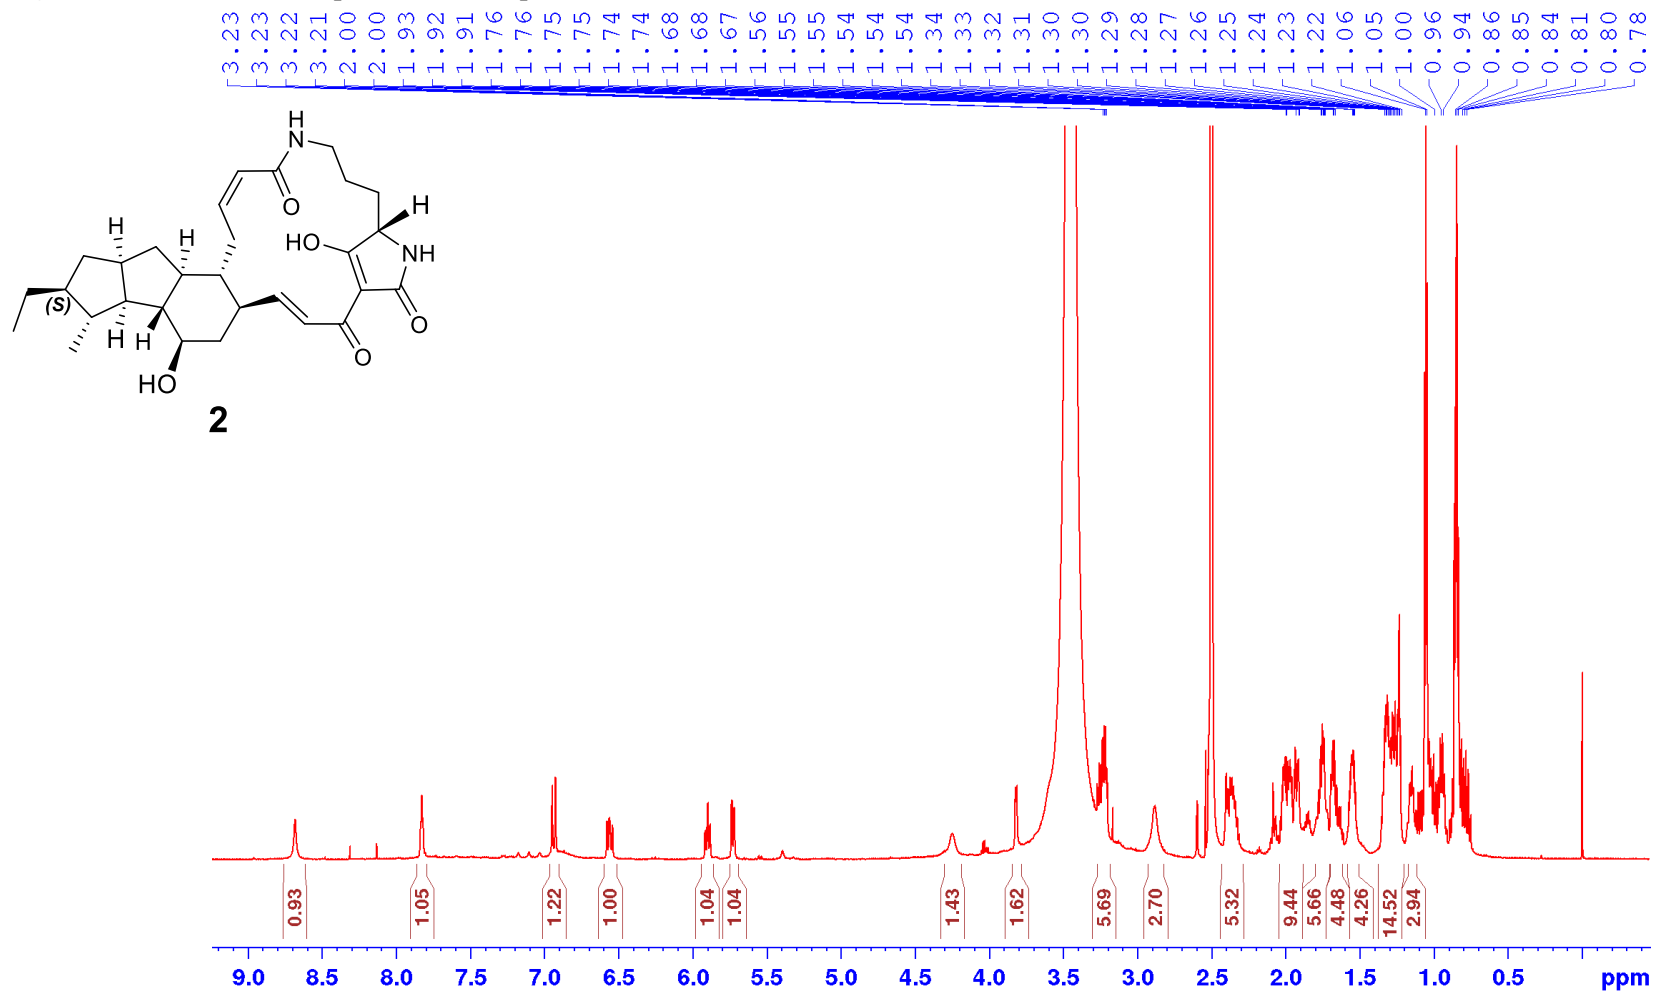

**Figure S13.** The  $^{13}\text{C}$  NMR and DEPT 135 spectra of compound **2** in  $\text{DMSO-}d_6$ .

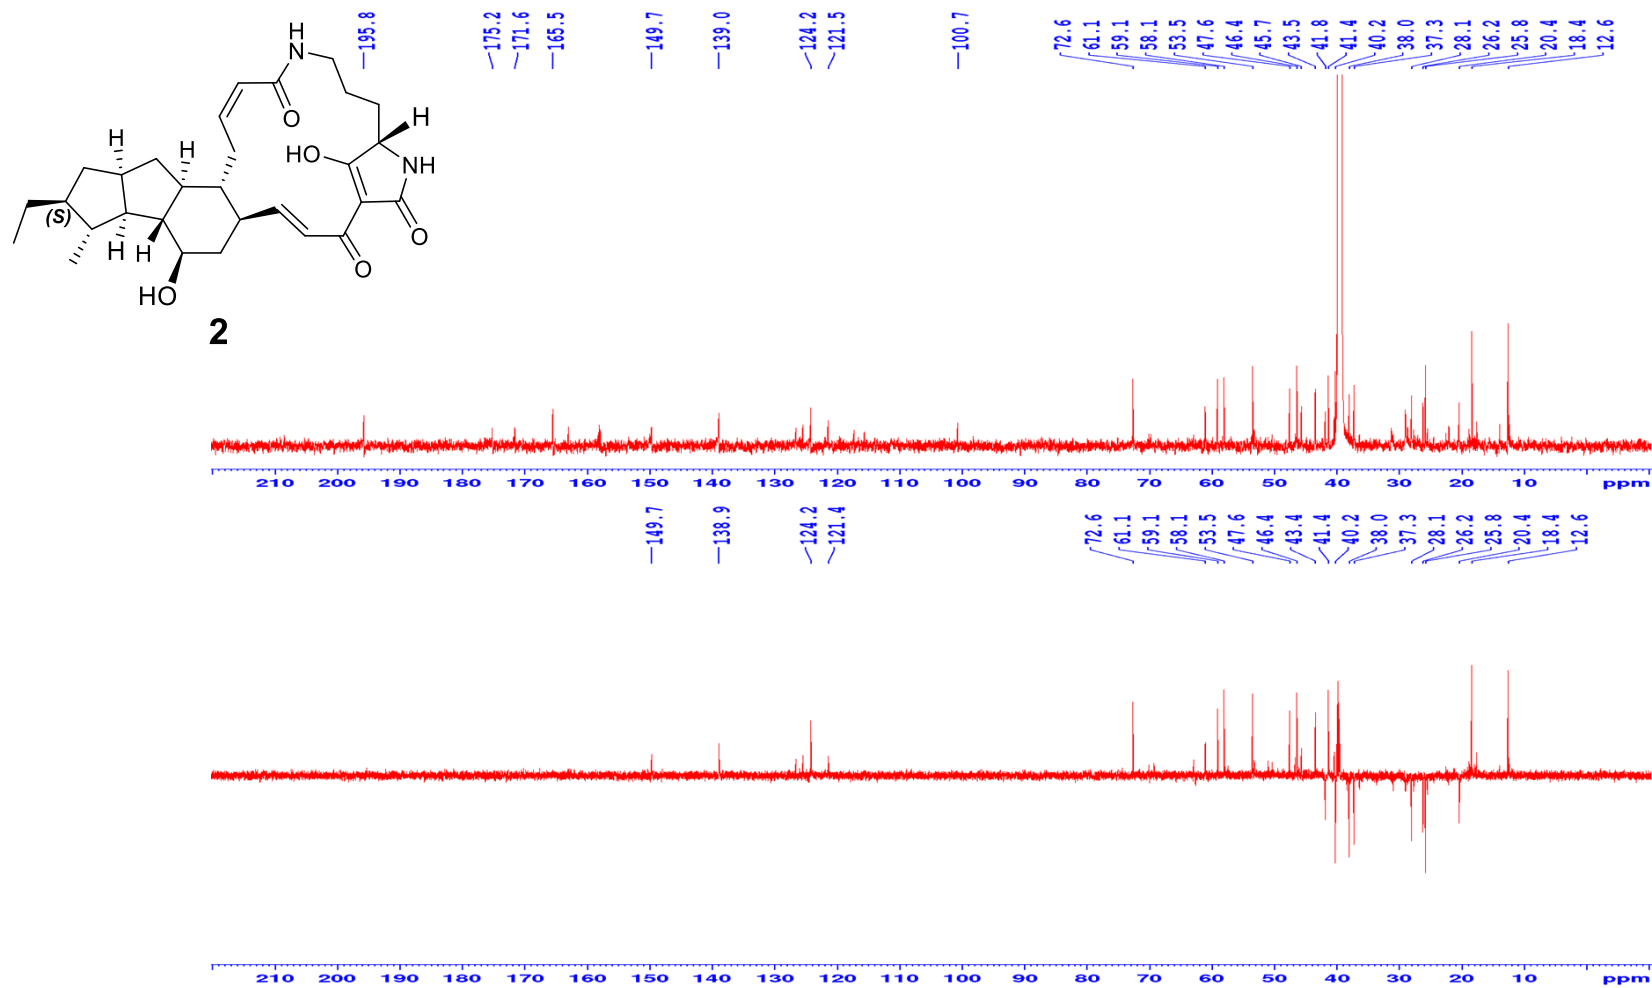



**Figure S14.** The HSQC spectrum of compound **2** in DMSO- $d_6$ .

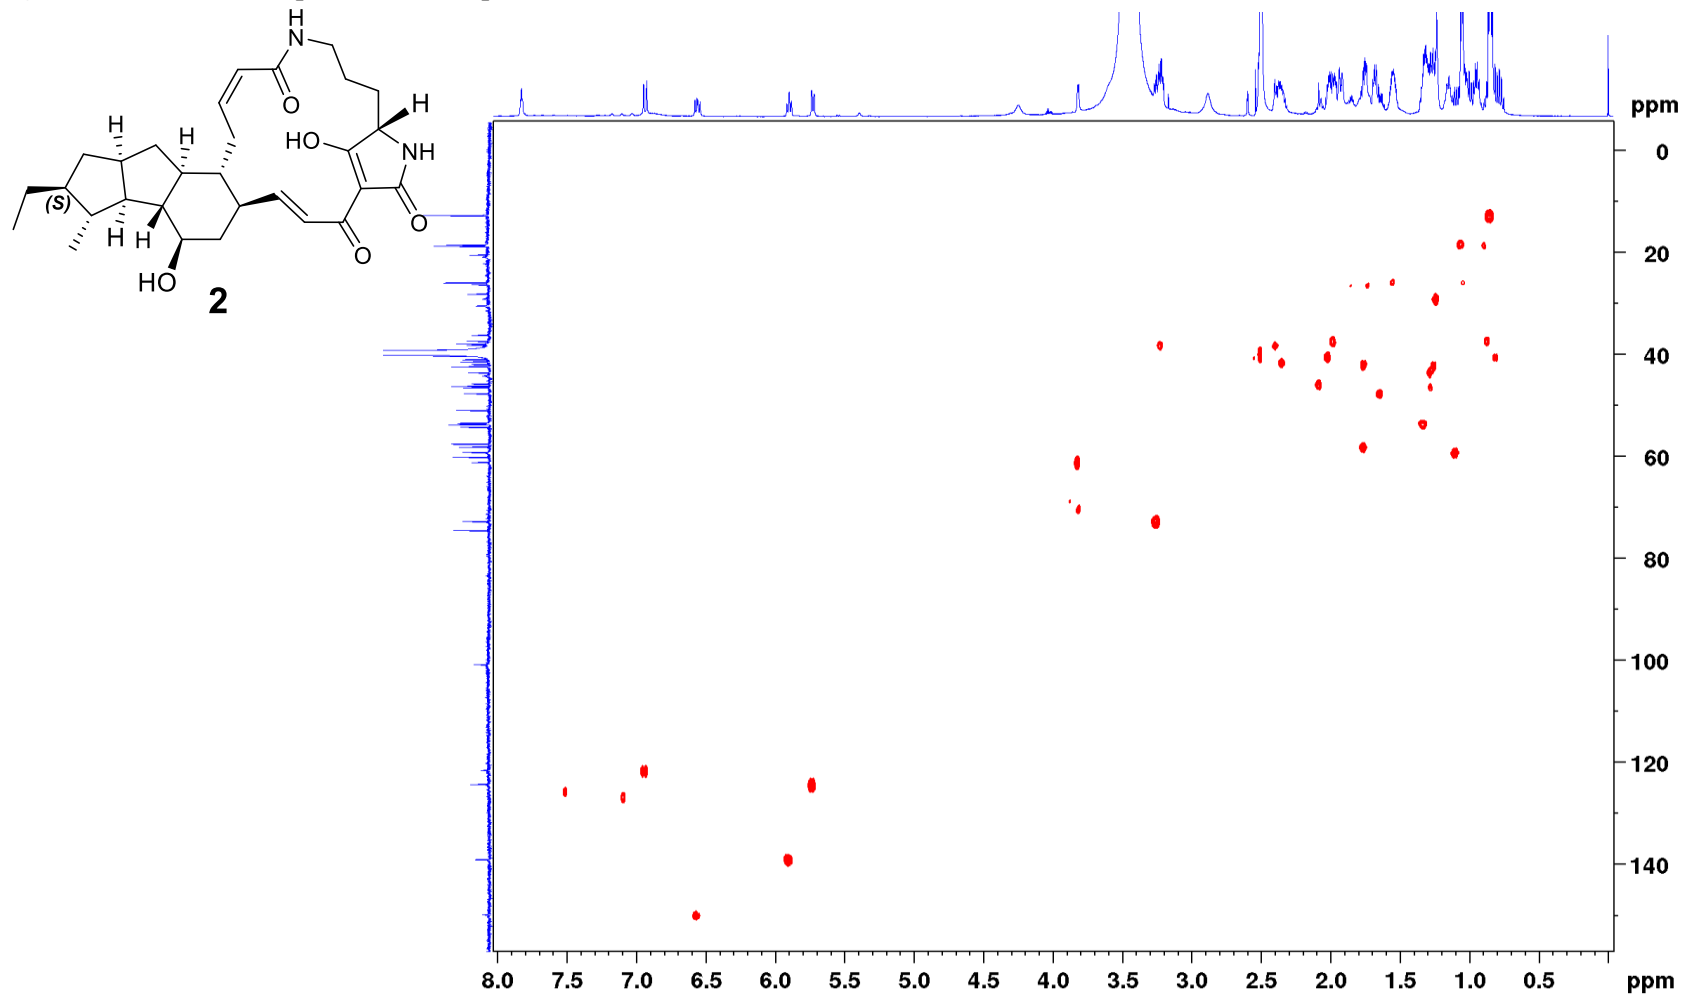

**Figure S15.** The HMBC spectrum of compound **2** in DMSO-*d*<sub>6</sub>.

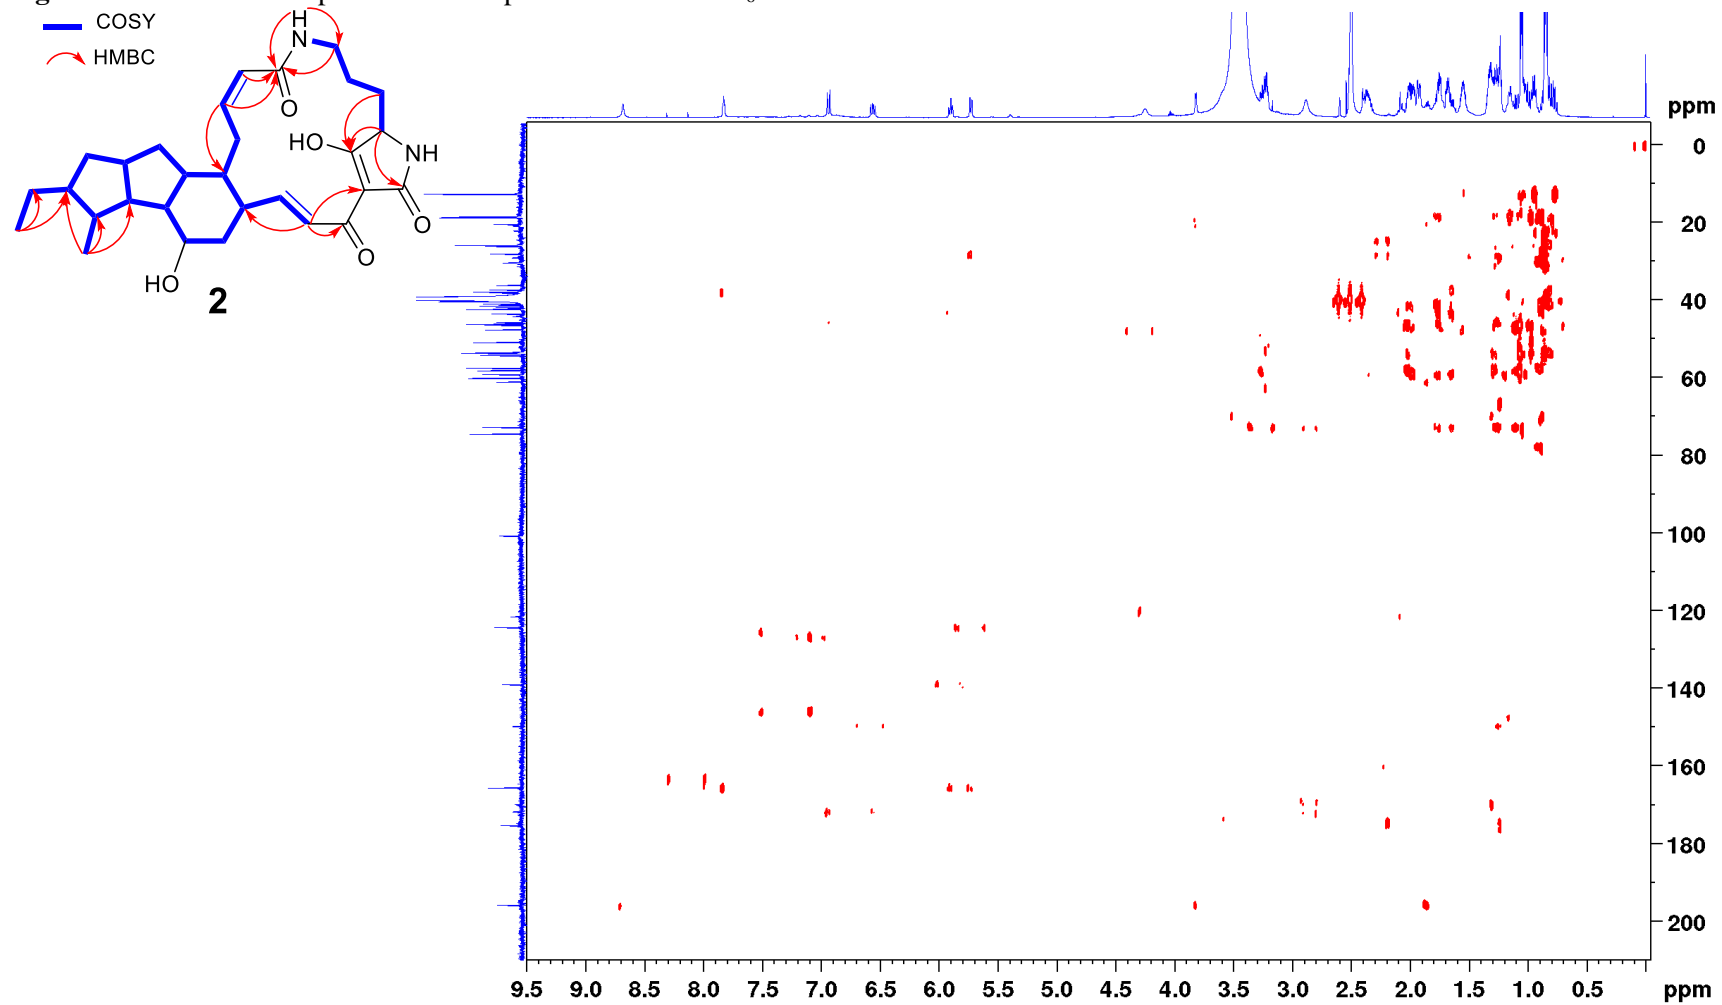

**Figure S16.** The  $^1\text{H}$ - $^1\text{H}$ HCOSY spectrum of compound **2** in  $\text{DMSO-}d_6$ .

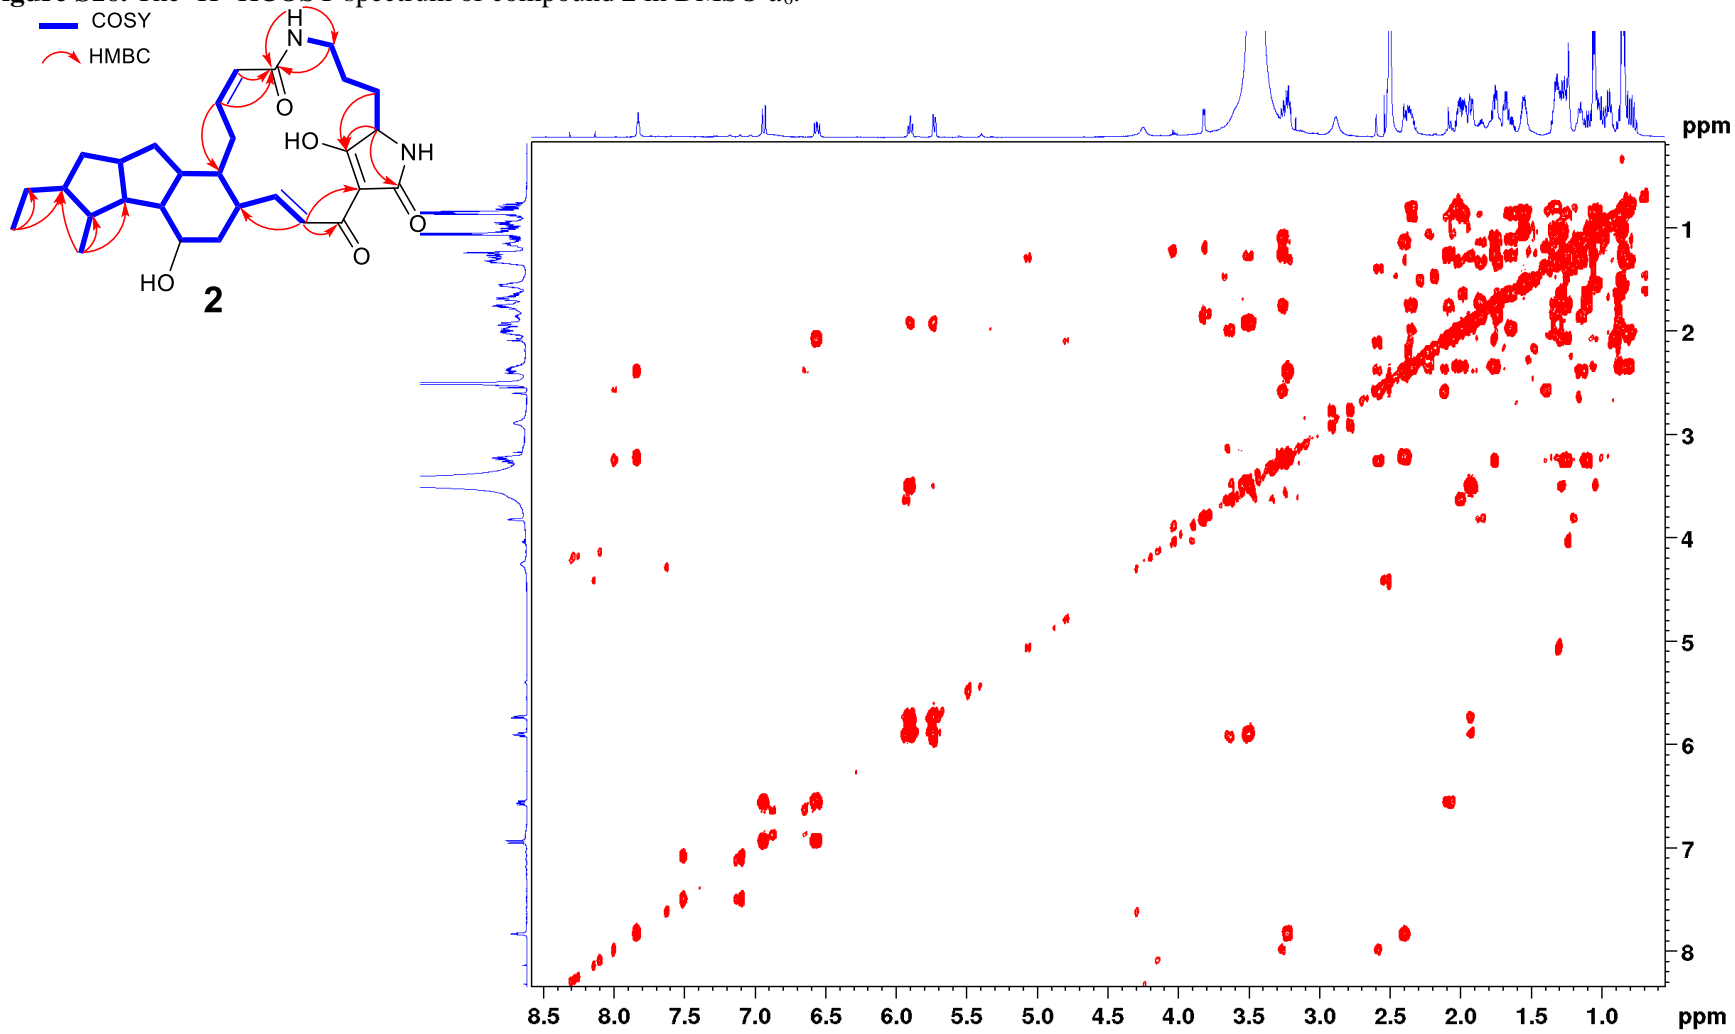

Figure S17. The NOESY spectrum of compound 2 in DMSO- $d_6$ .

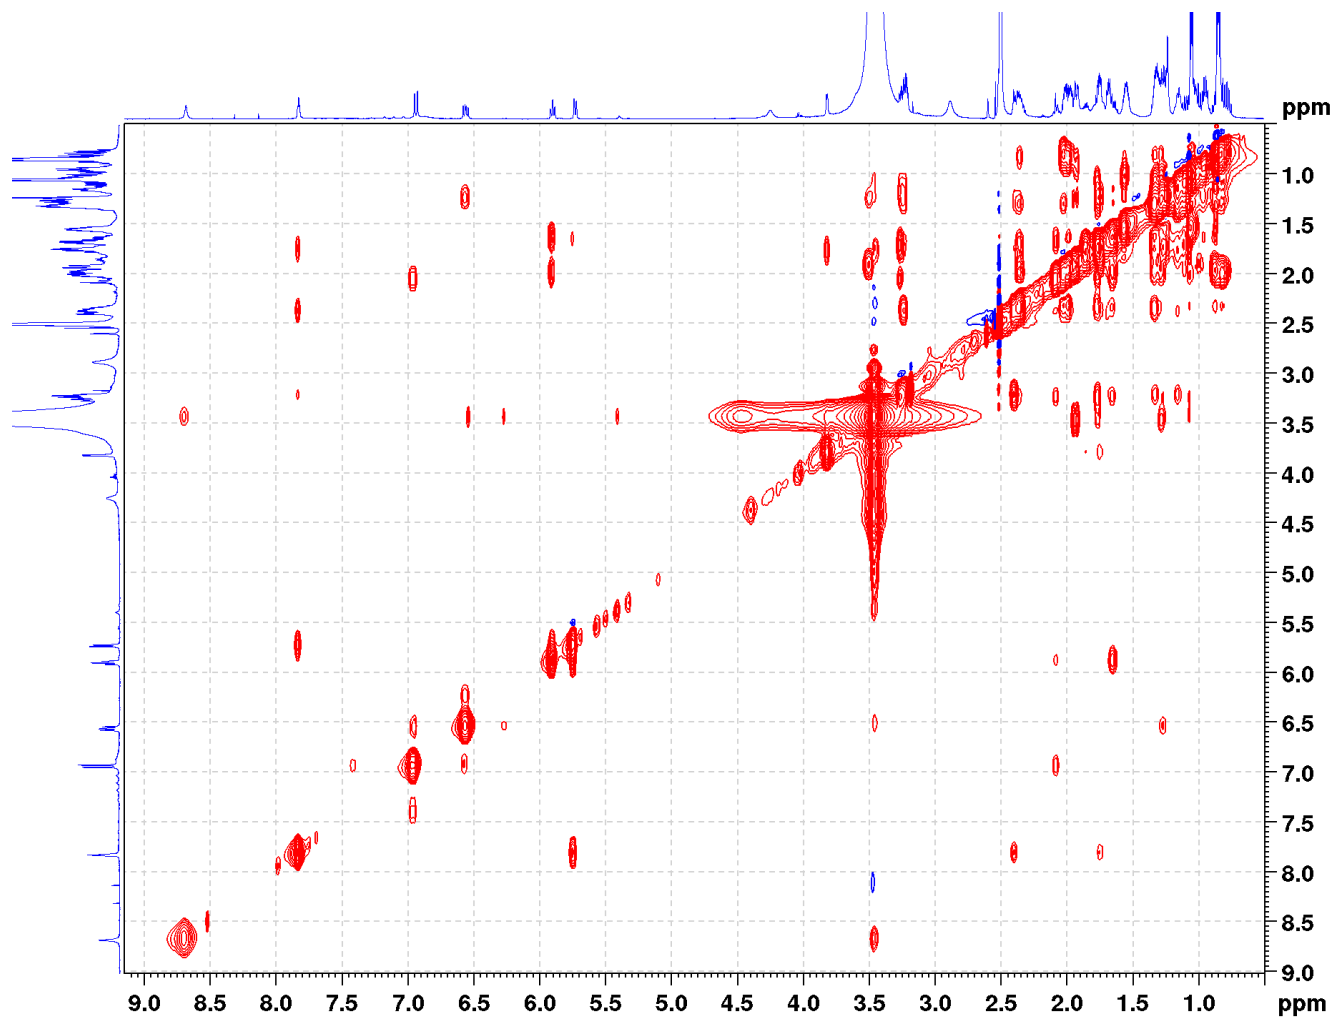

**Figure S18.** The key NOESY spectrum of compound **2** in DMSO-*d*<sub>6</sub>.

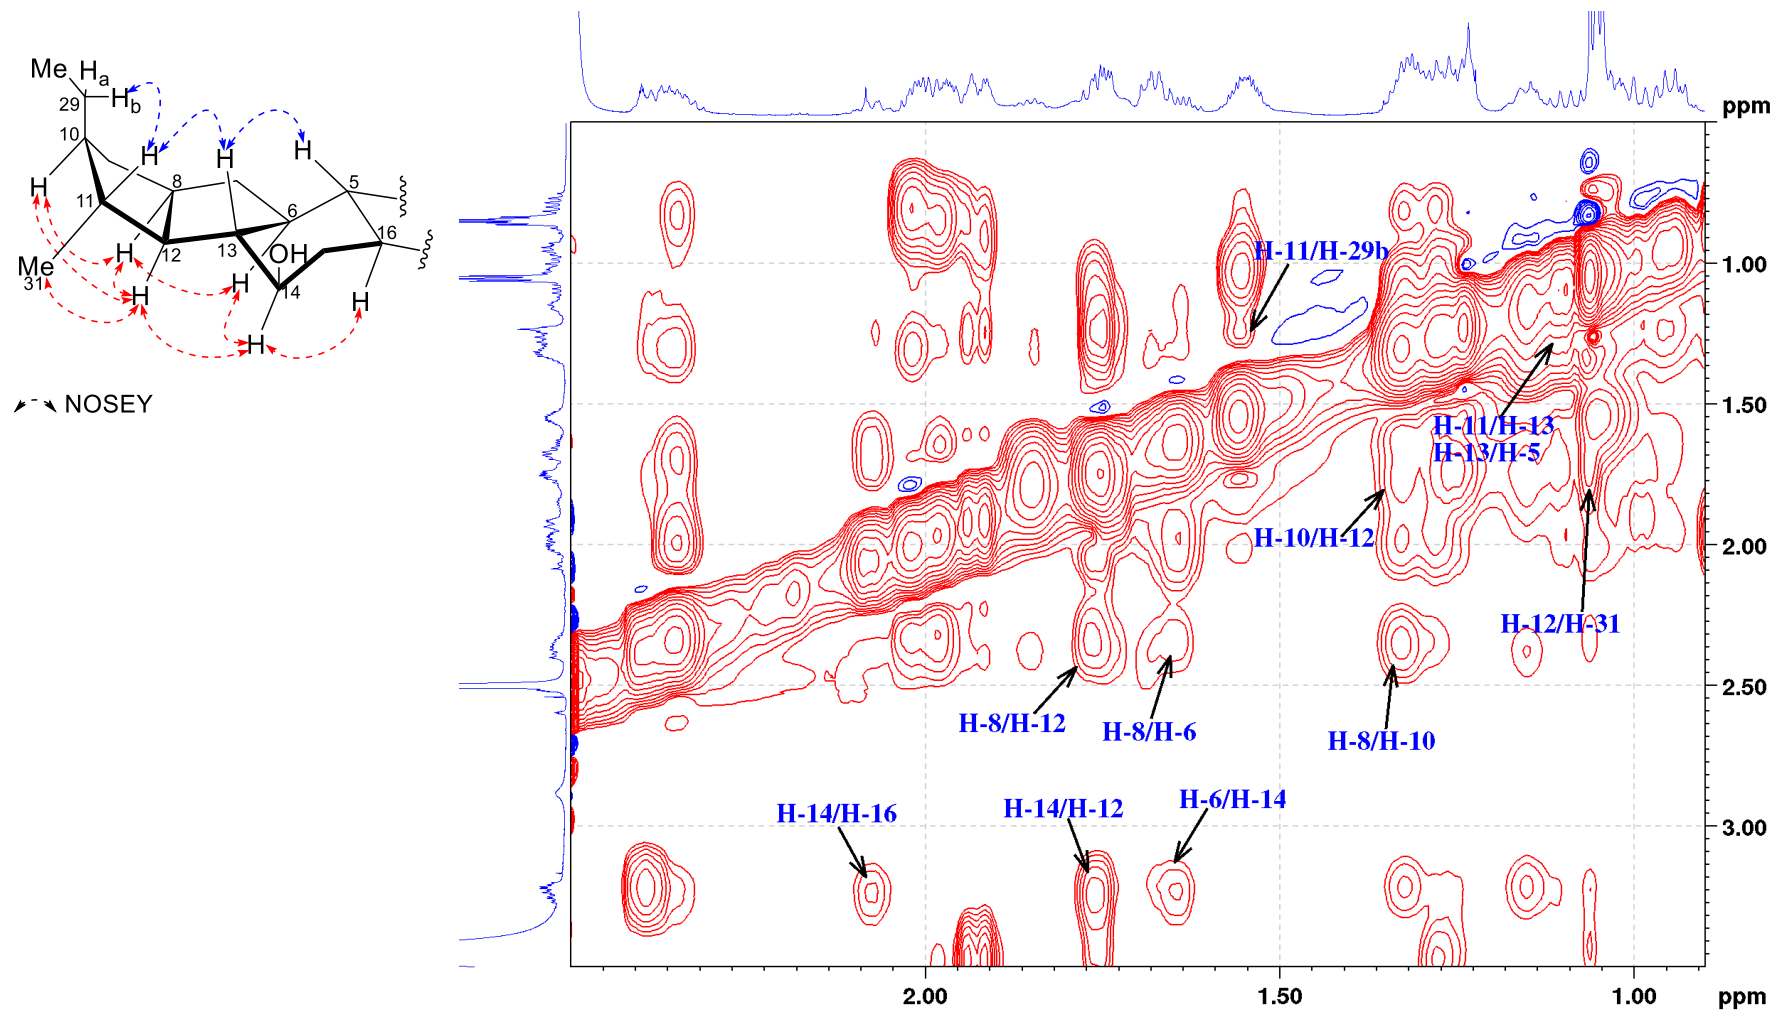

**Figure S19.** HRESIMS (a) and IR (b) of compound **3**.

**(a) HRESIMS**

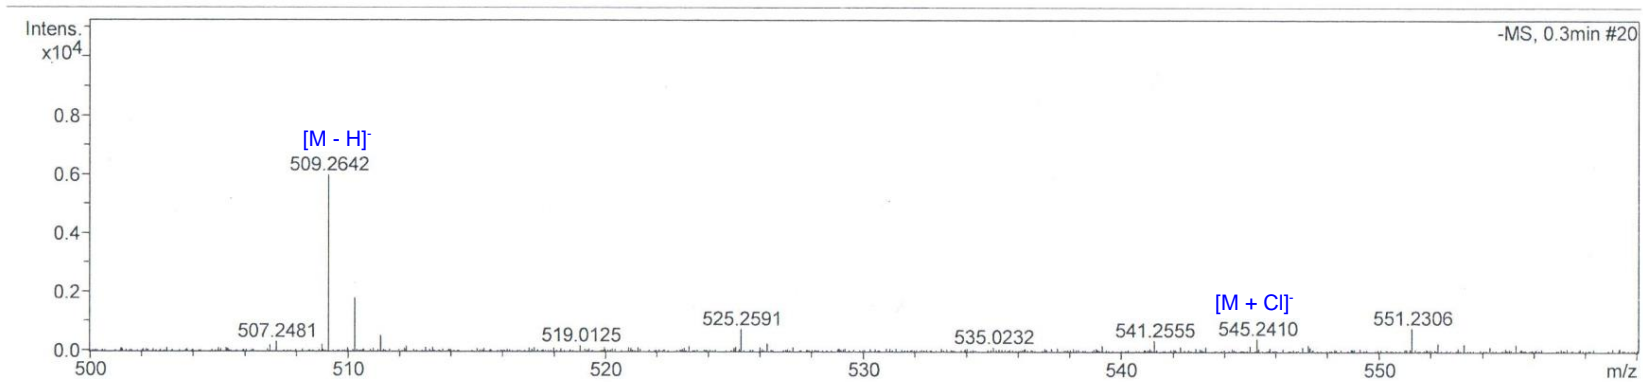

**(b) IR**

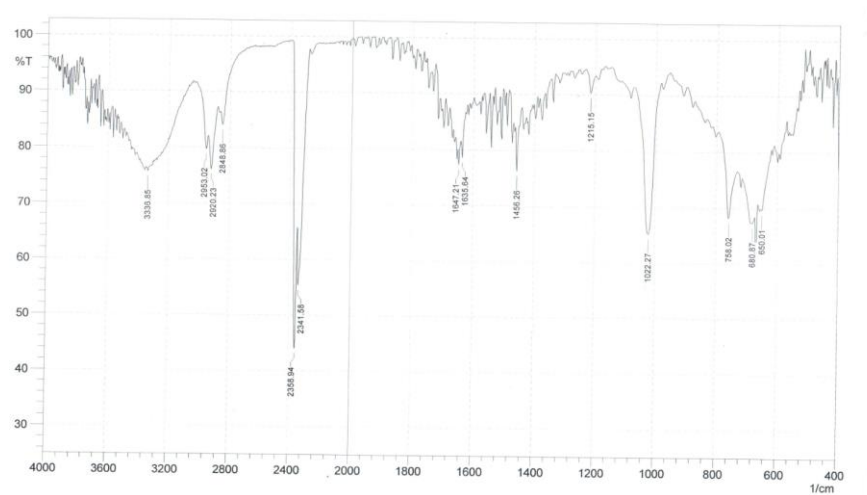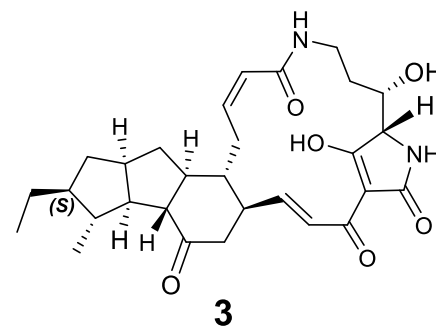

Chemical Formula:  $C_{29}H_{38}N_2O_6$   
calculated for [M-H]<sup>-</sup>: 509.2652  
calculated for [M+Cl]<sup>-</sup>: 545.2418

Figure S20. The  $^1\text{H}$  NMR spectrum of compound **3** in  $\text{DMSO-}d_6$ .

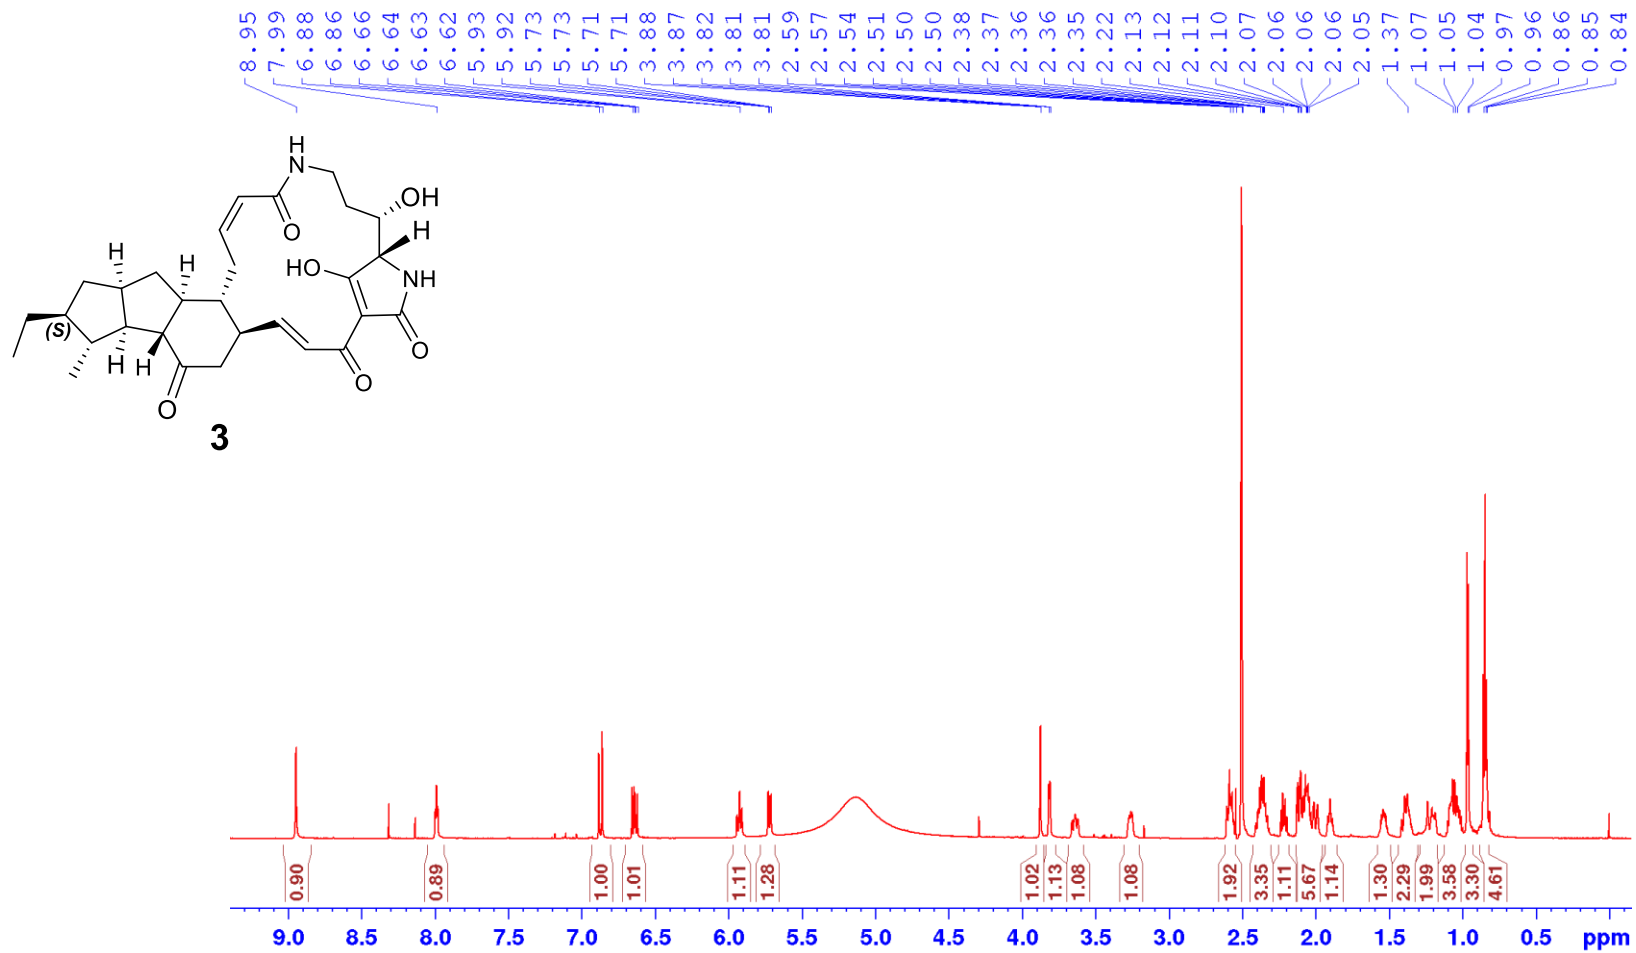

**Figure S21.** The  $^{13}\text{C}$  NMR and DEPT 135 spectra of compound **3** in  $\text{DMSO-}d_6$ .

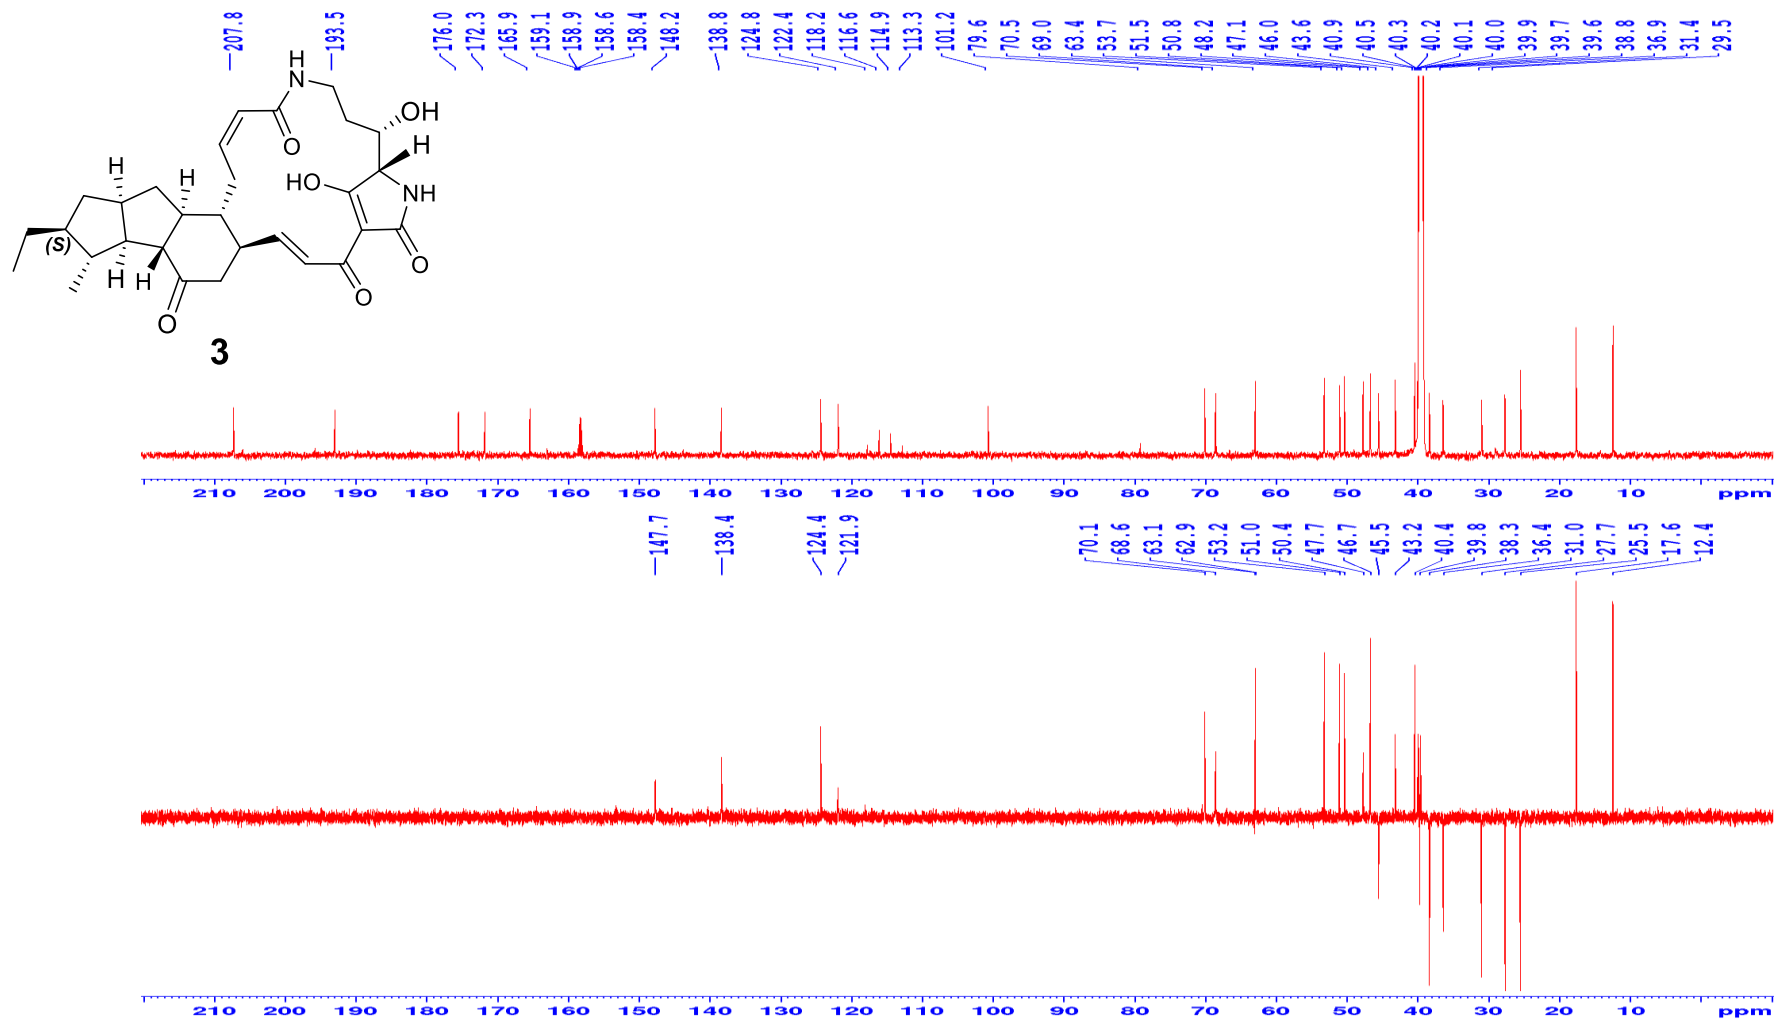



**Figure S22.** The HSQC spectrum of compound **3** in DMSO- $d_6$ .

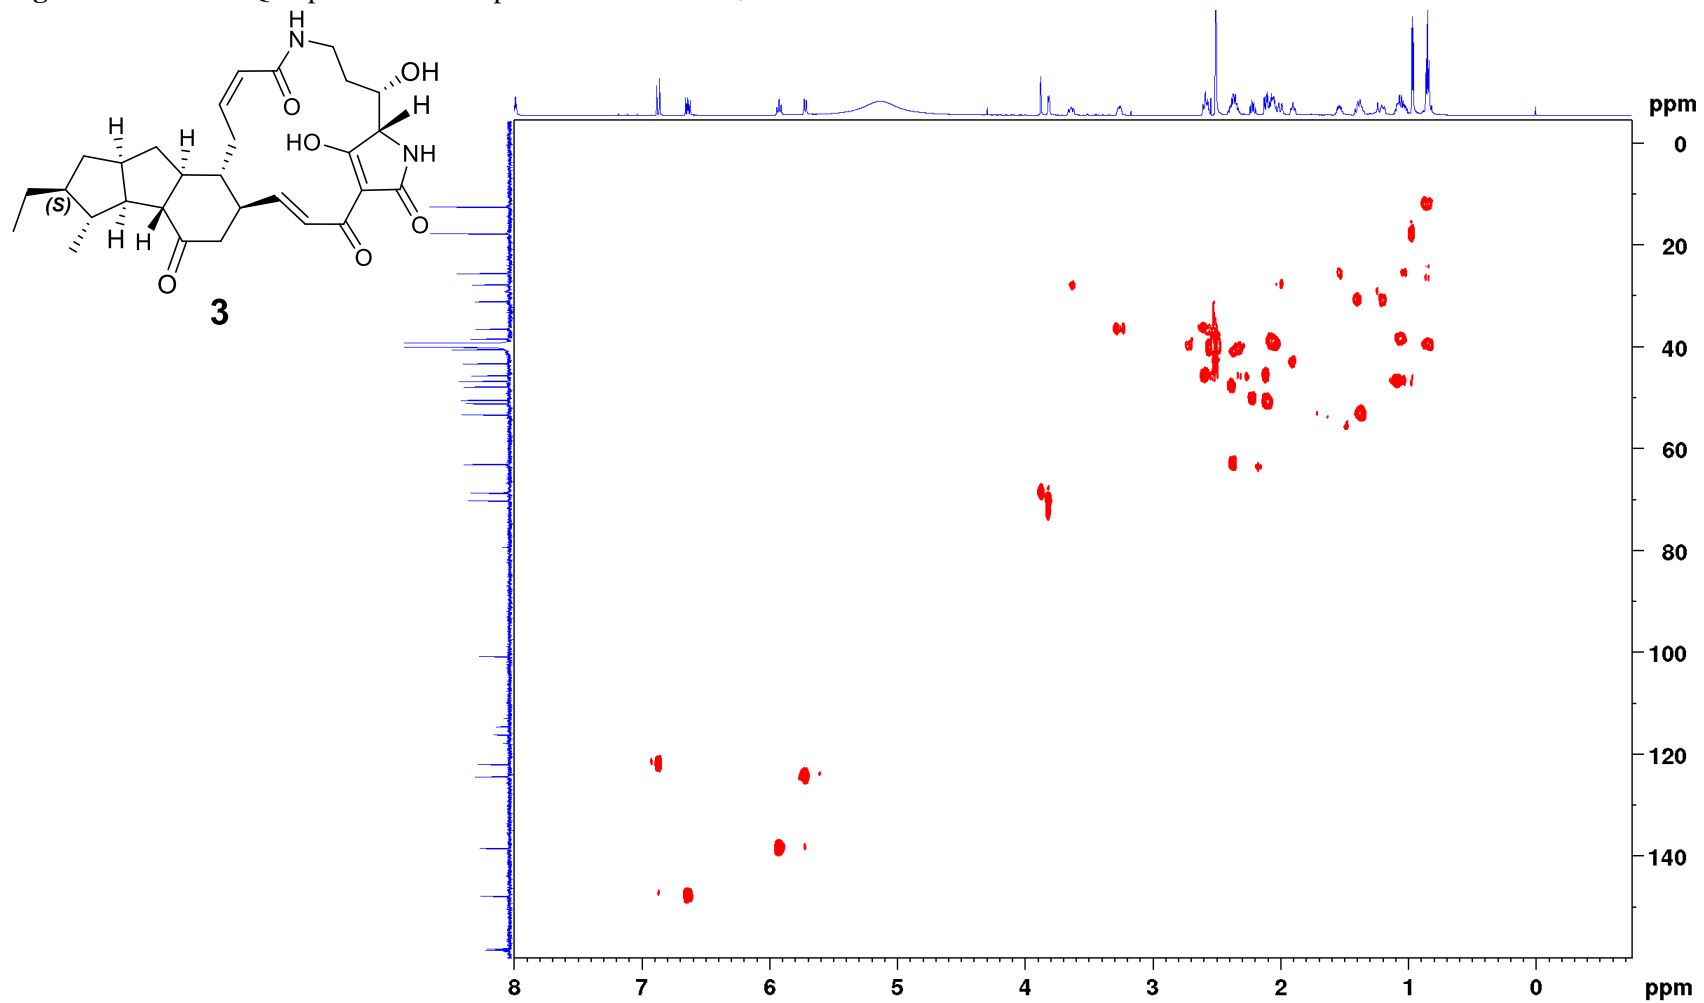

**Figure S23.** The HMBC spectrum of compound **3** in DMSO-*d*<sub>6</sub>.

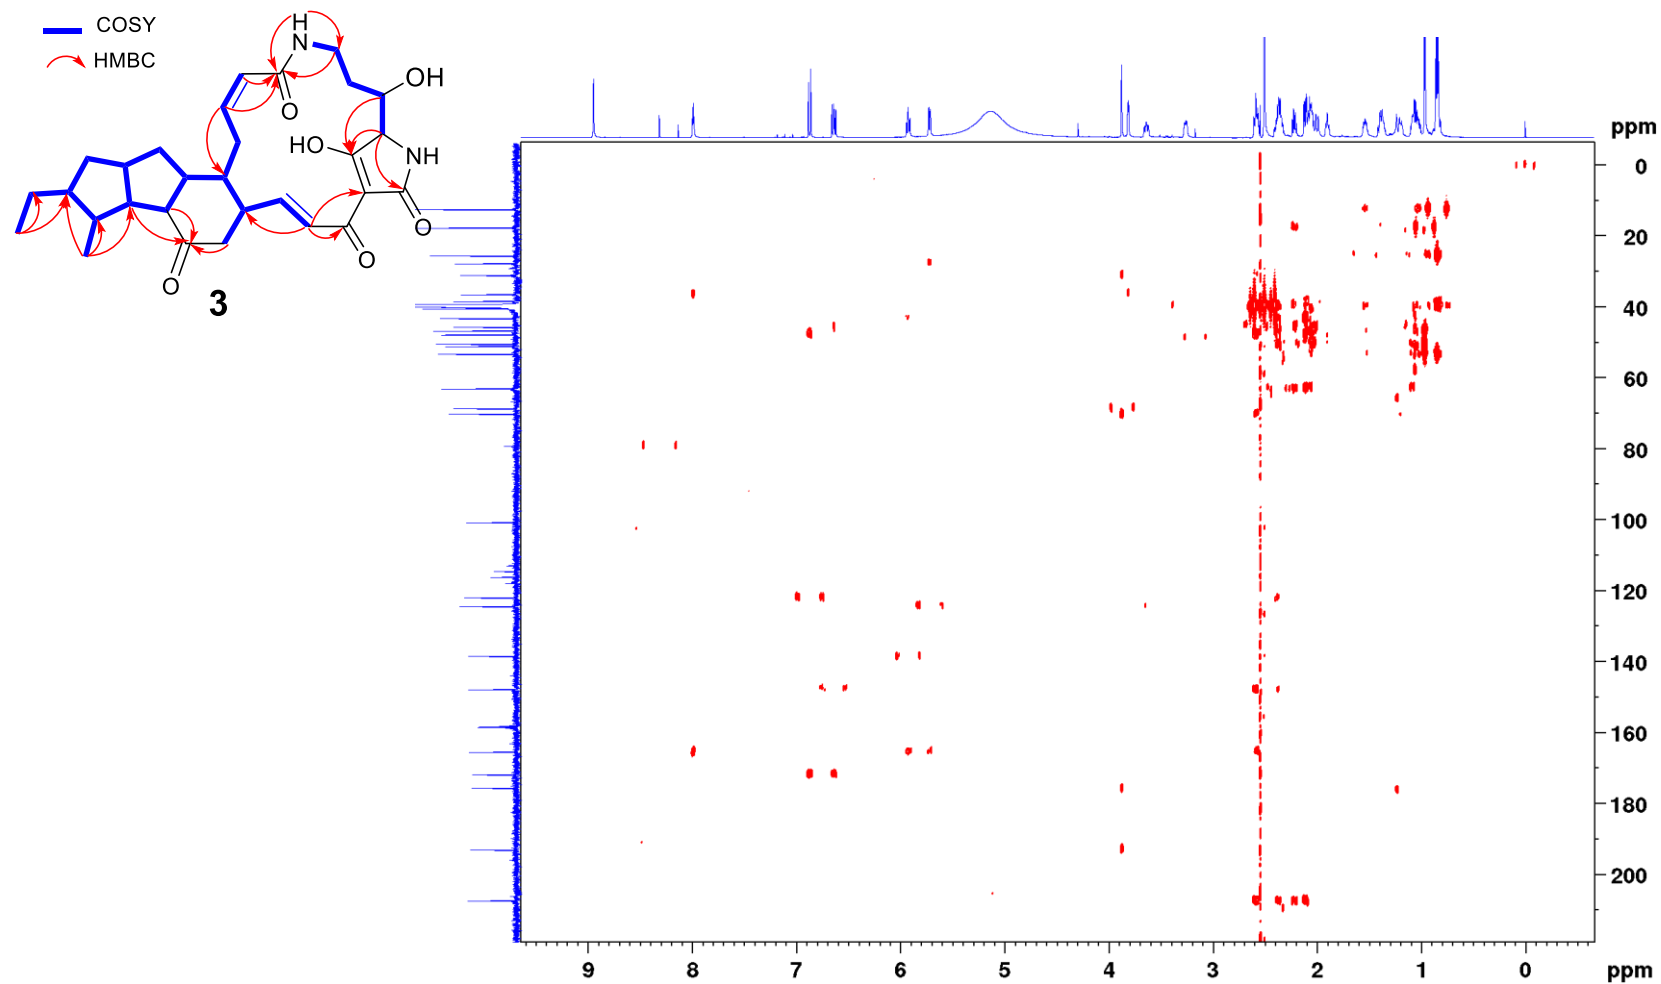

**Figure S24.** The  $^1\text{H}$ - $^1\text{H}$  COSY spectrum of compound **3** in  $\text{DMSO-}d_6$ .

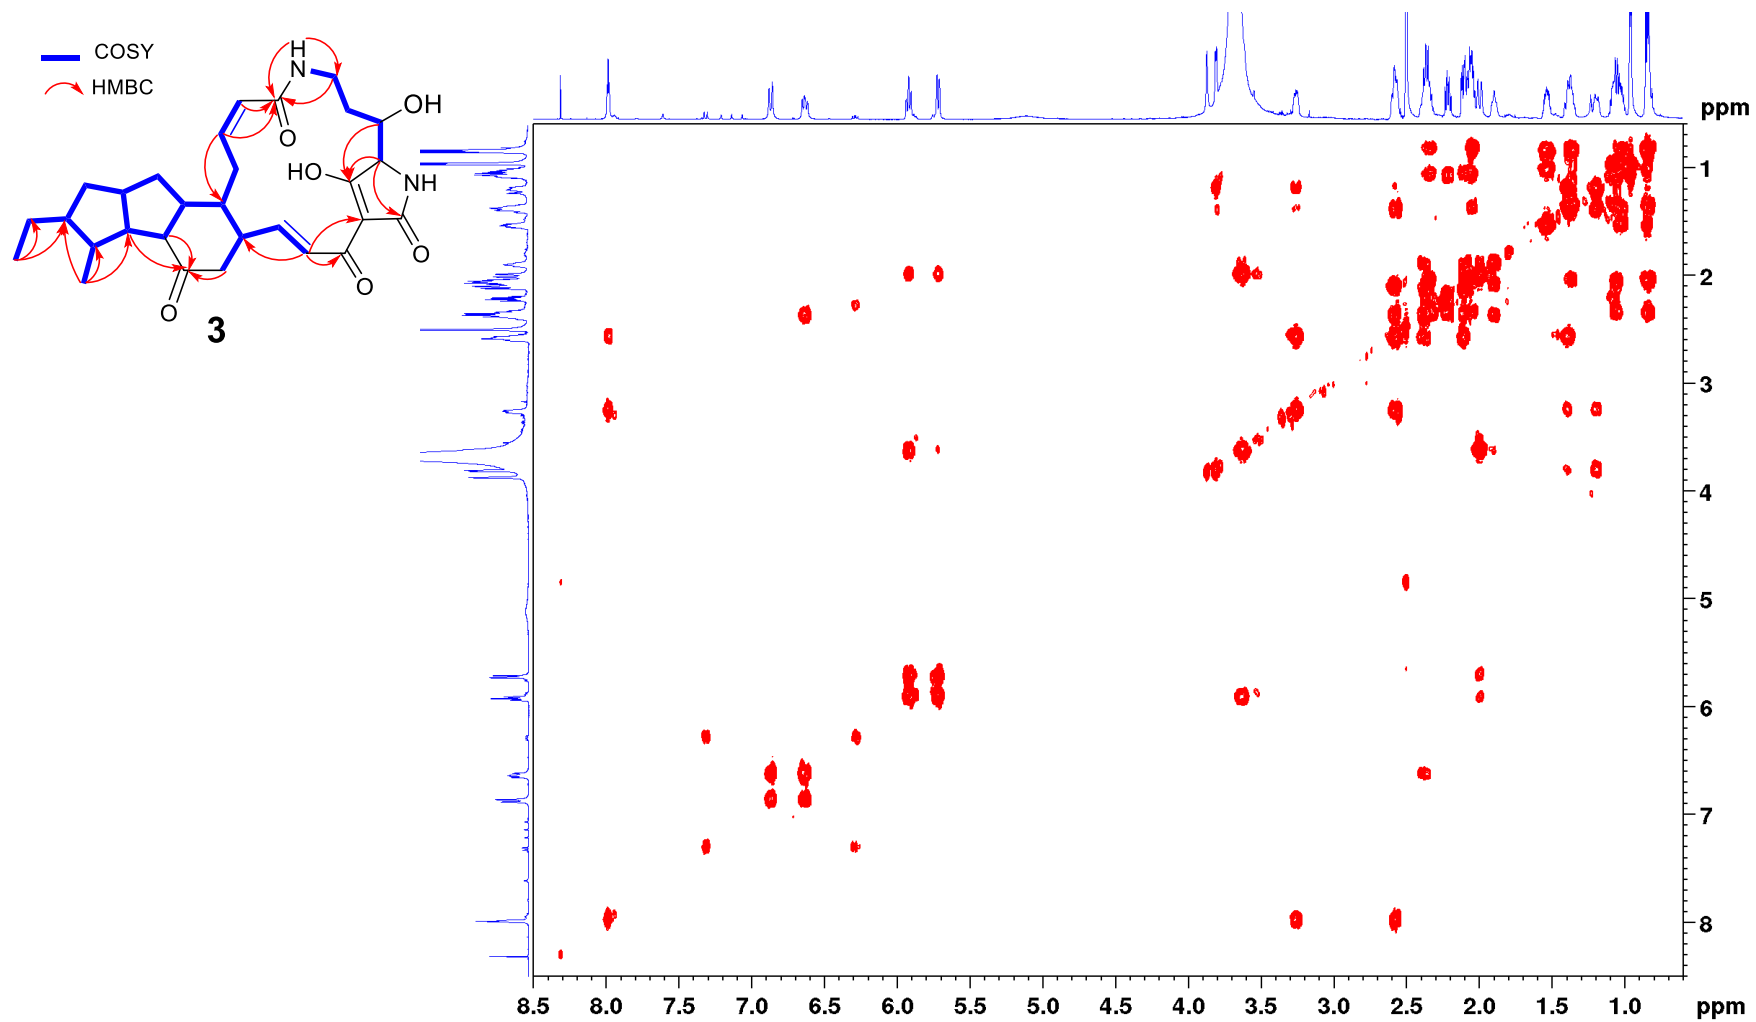

Figure S25. The NOESY spectrum of compound **3** in DMSO-*d*<sub>6</sub>.

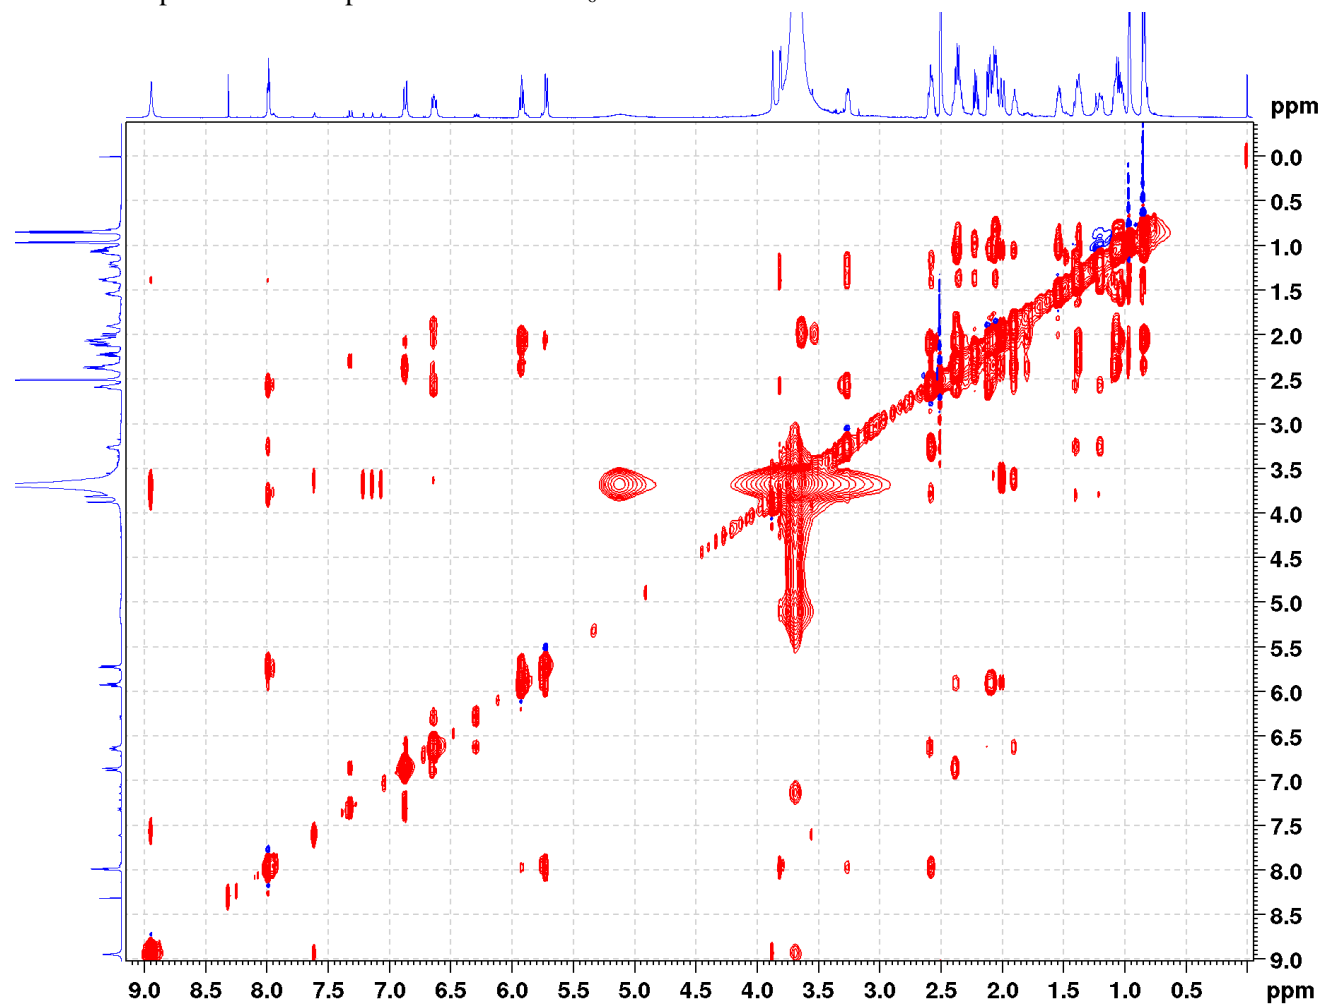

**Figure S26.** The key NOESY spectrum of compound **3** in DMSO-*d*<sub>6</sub>.

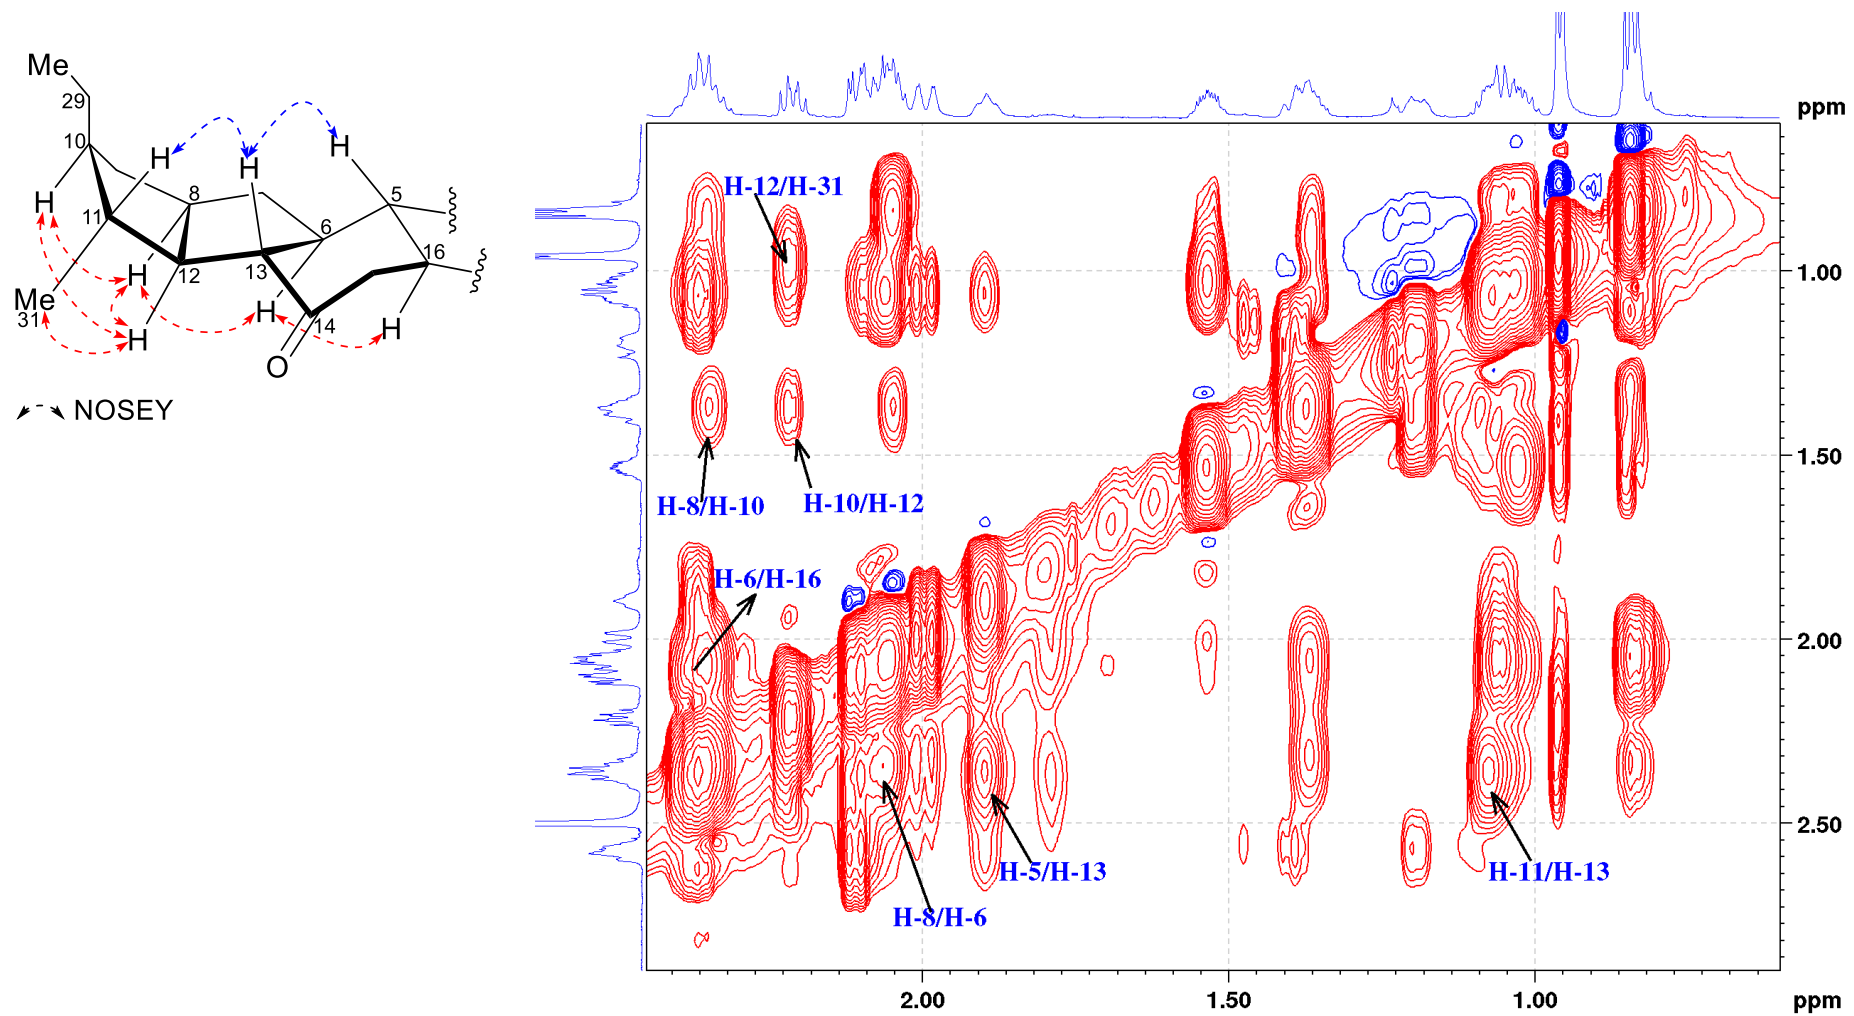

Figure S27. HRESIMS (a) and IR (b) of compound 4.

(a) HRESIMS

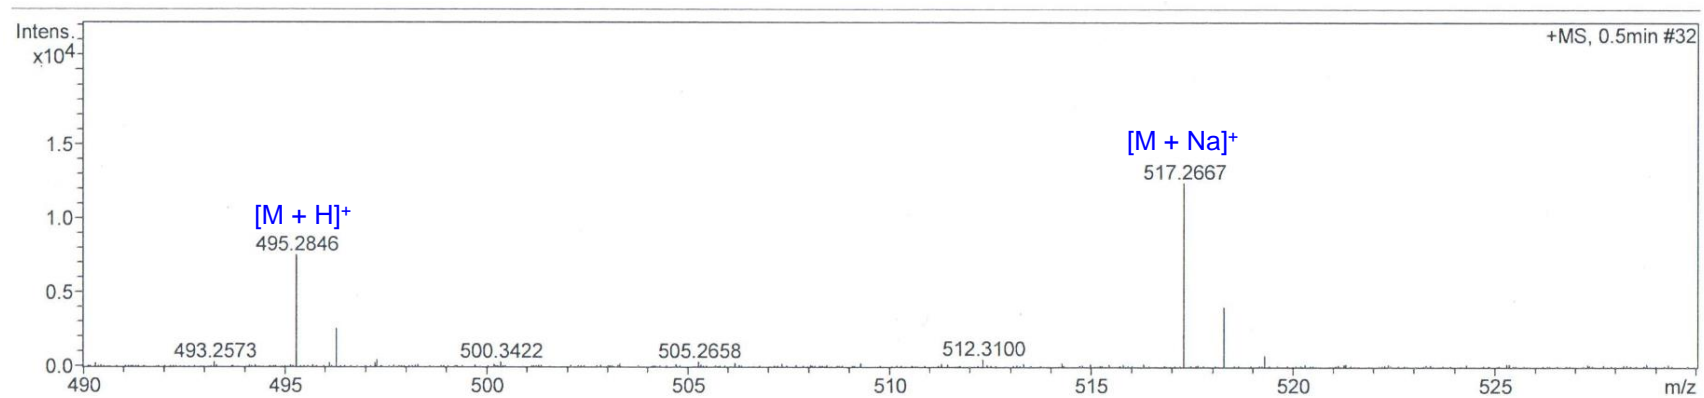

(b) IR

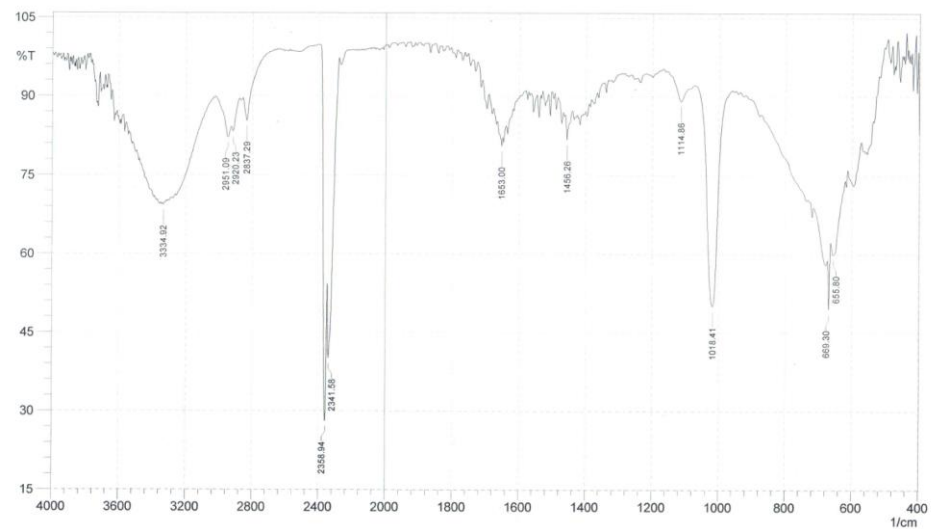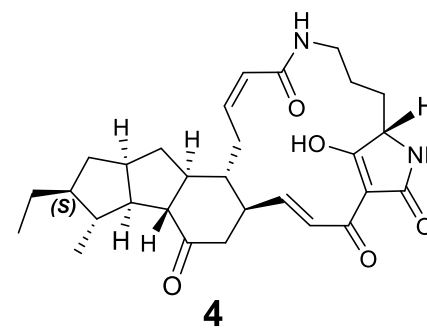

Chemical Formula:  $C_{29}H_{38}N_2O_5$   
calculated for  $[M+H]^+$ : 495.2859  
calculated for  $[M+H]^+$ : 517.2678

Figure S28. The  $^1\text{H}$  NMR spectrum of compound **4** in  $\text{DMSO-}d_6$ .

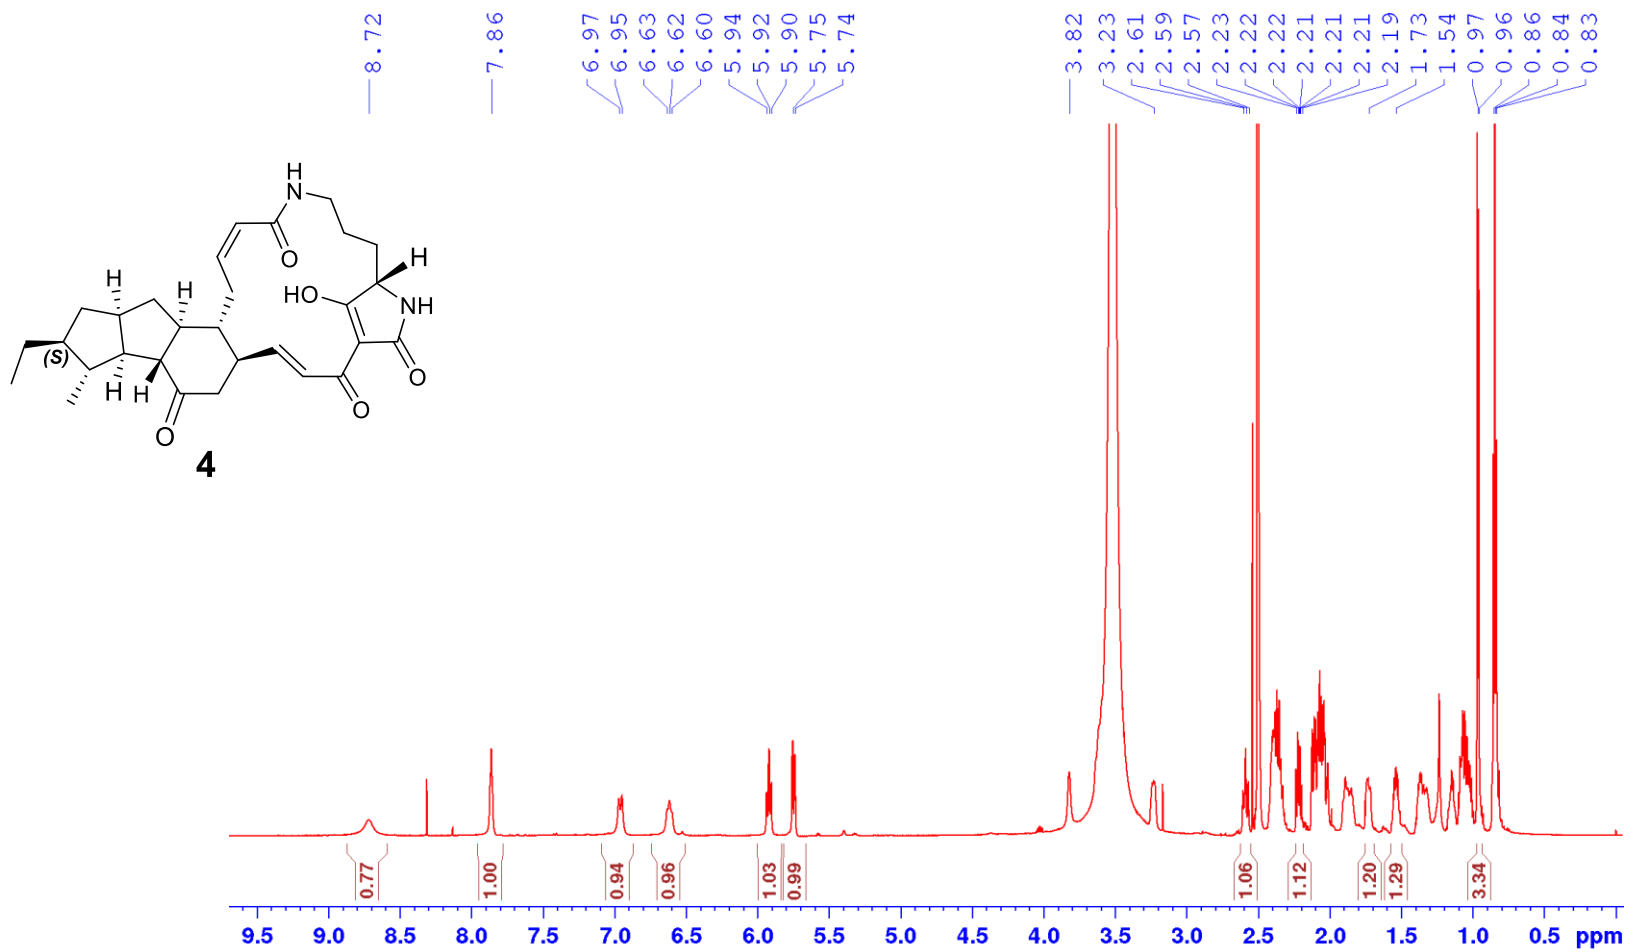

Figure S29. The  $^{13}\text{C}$  NMR and DEPT 135 spectra of compound **4** in  $\text{DMSO-}d_6$ .

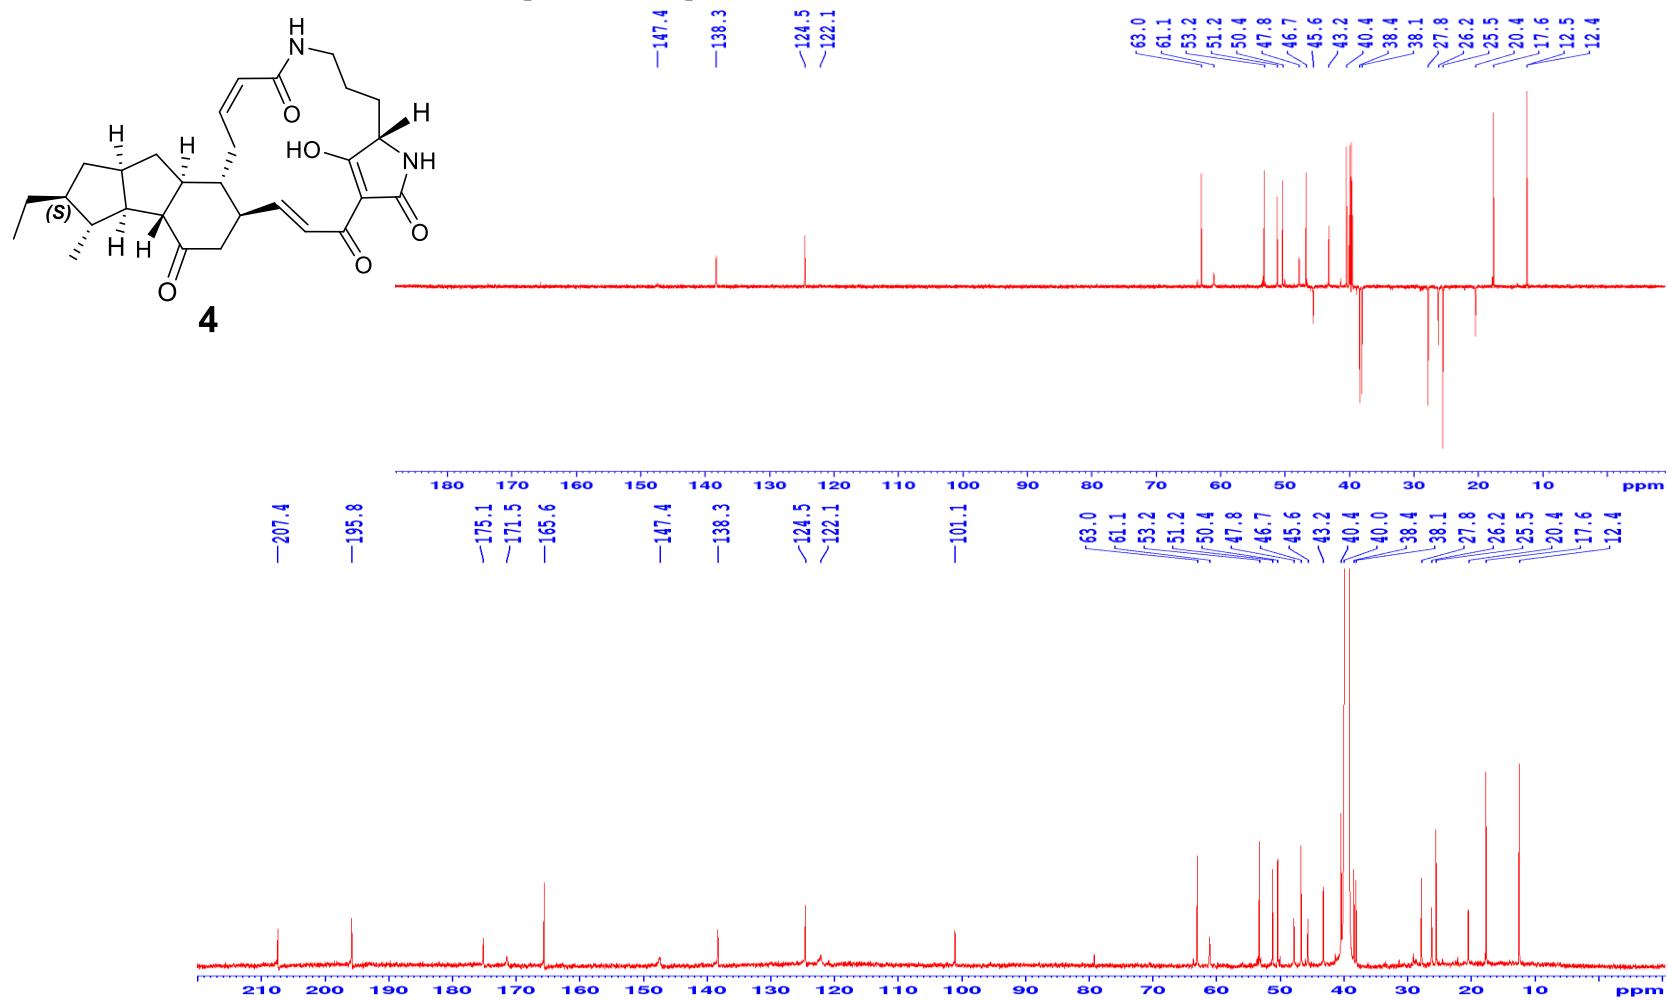



Figure S30. The HSQC spectrum of compound **4** in DMSO- $d_6$ .

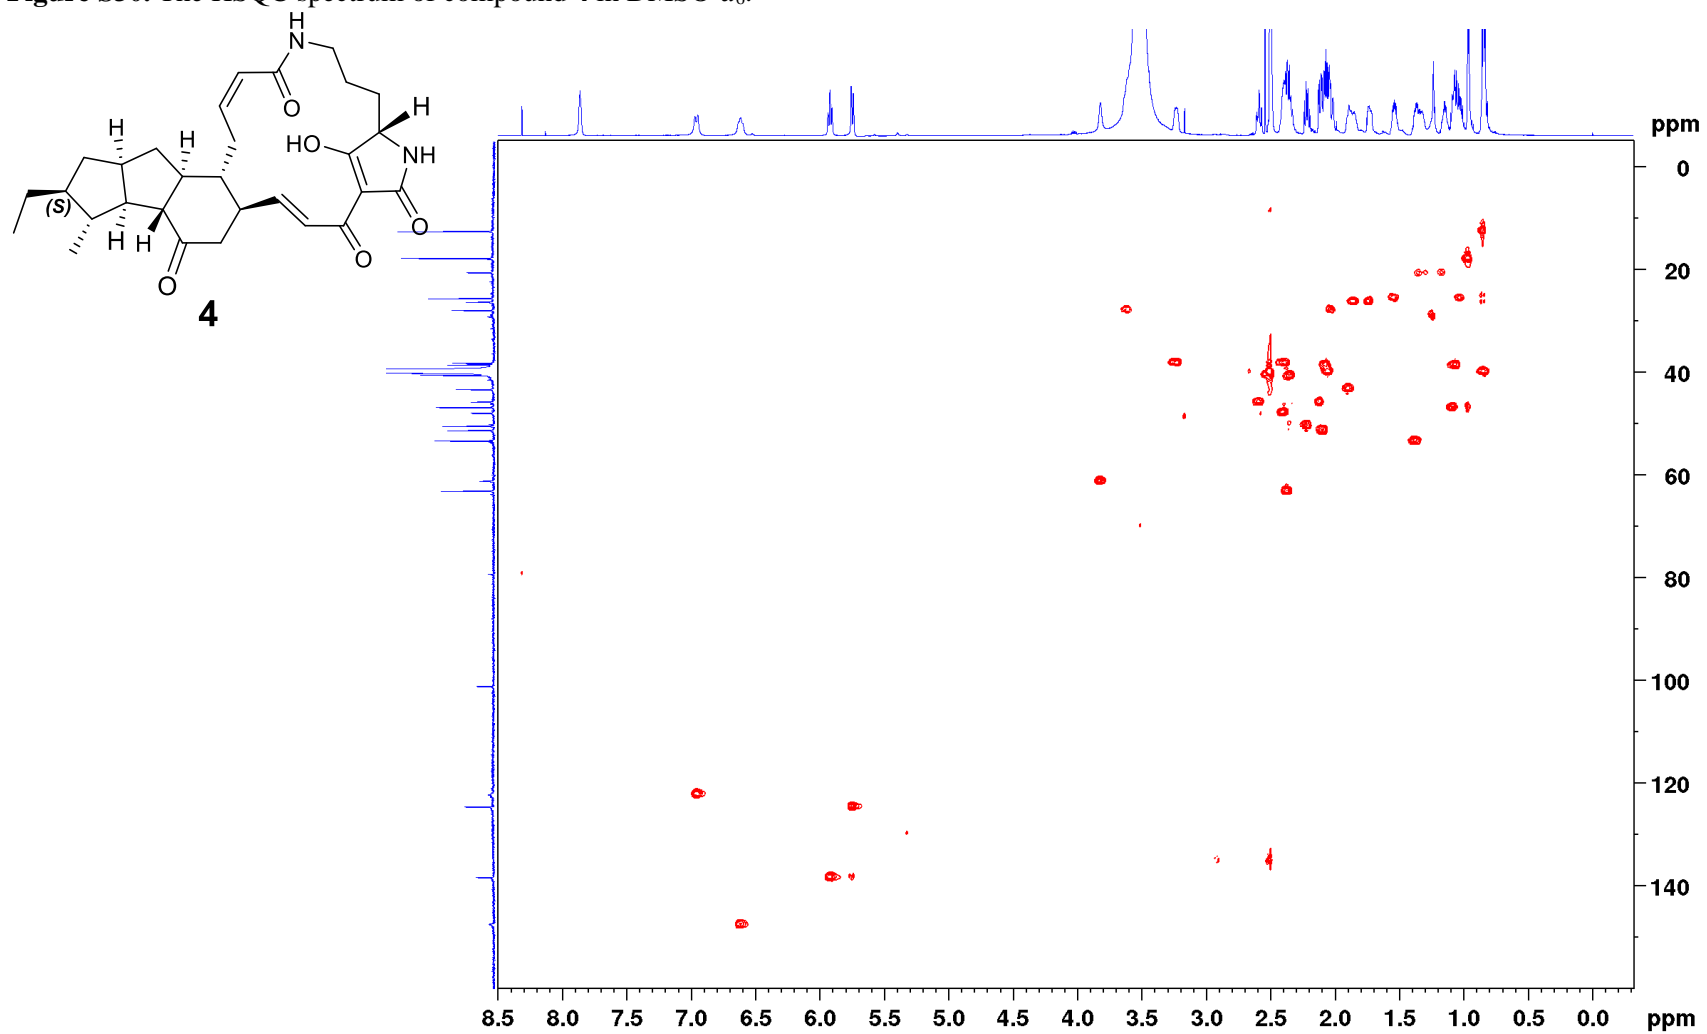

**Figure S31.** The HMBC spectrum of compound **4** in DMSO-*d*<sub>6</sub>.

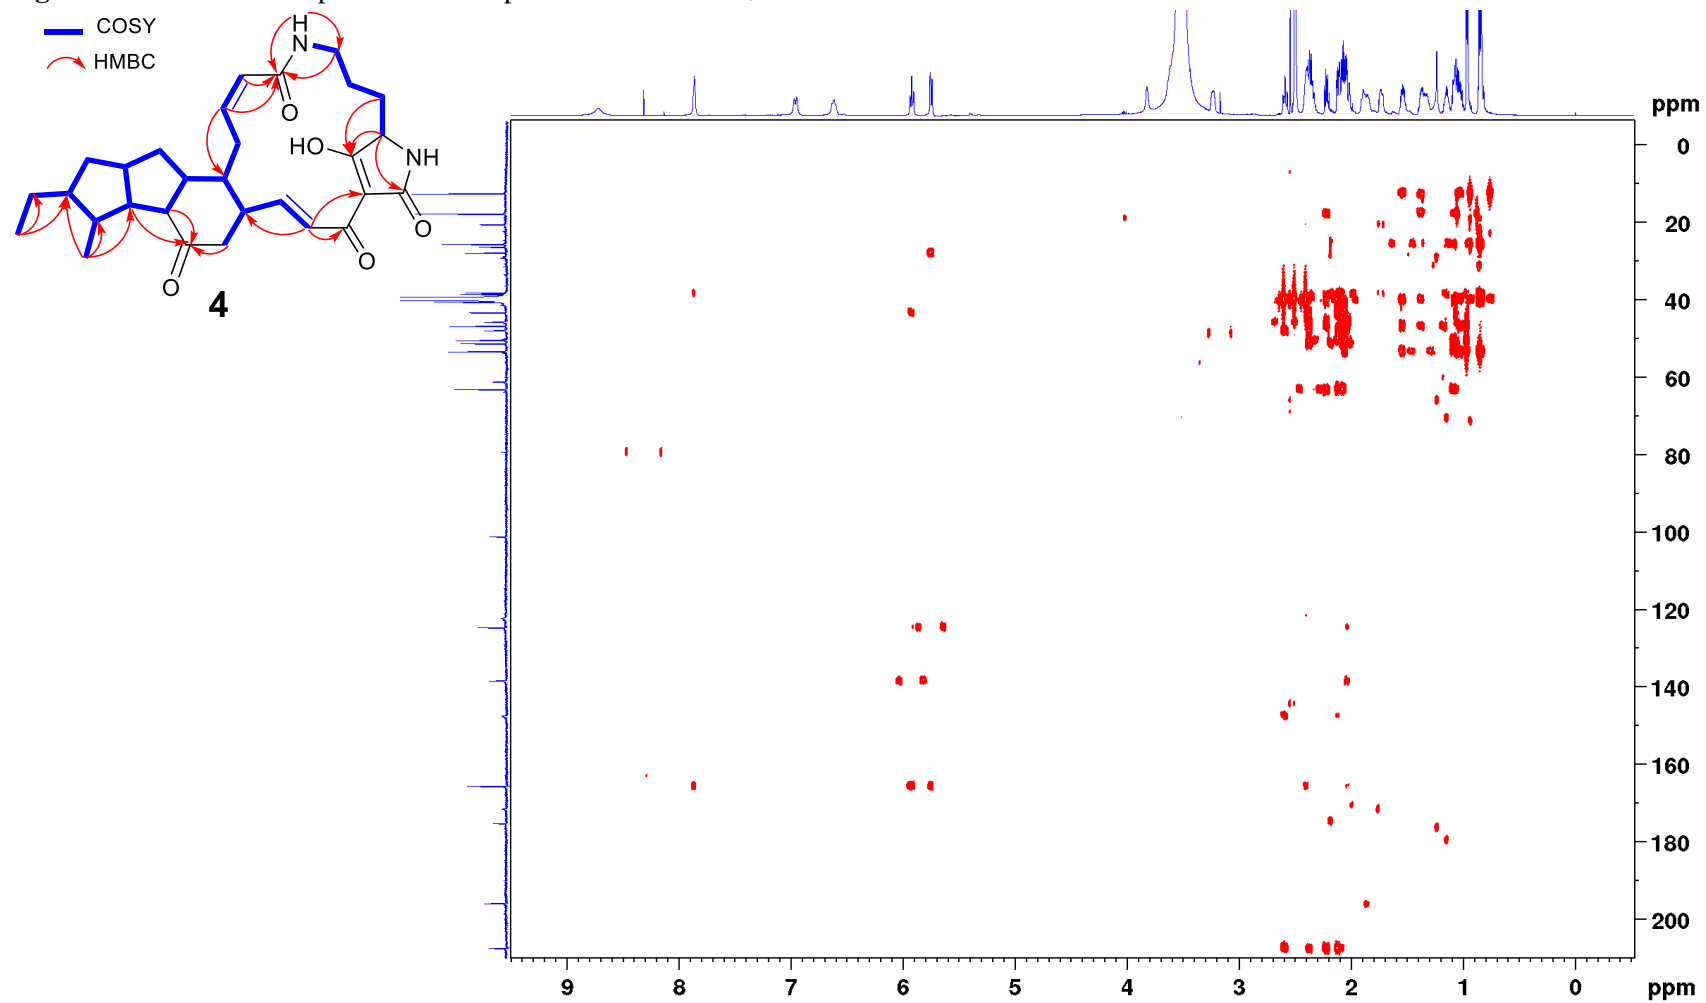

**Figure S32.** The  $^1\text{H}$ - $^1\text{H}$  COSY spectrum of compound **4** in  $\text{DMSO-}d_6$ .

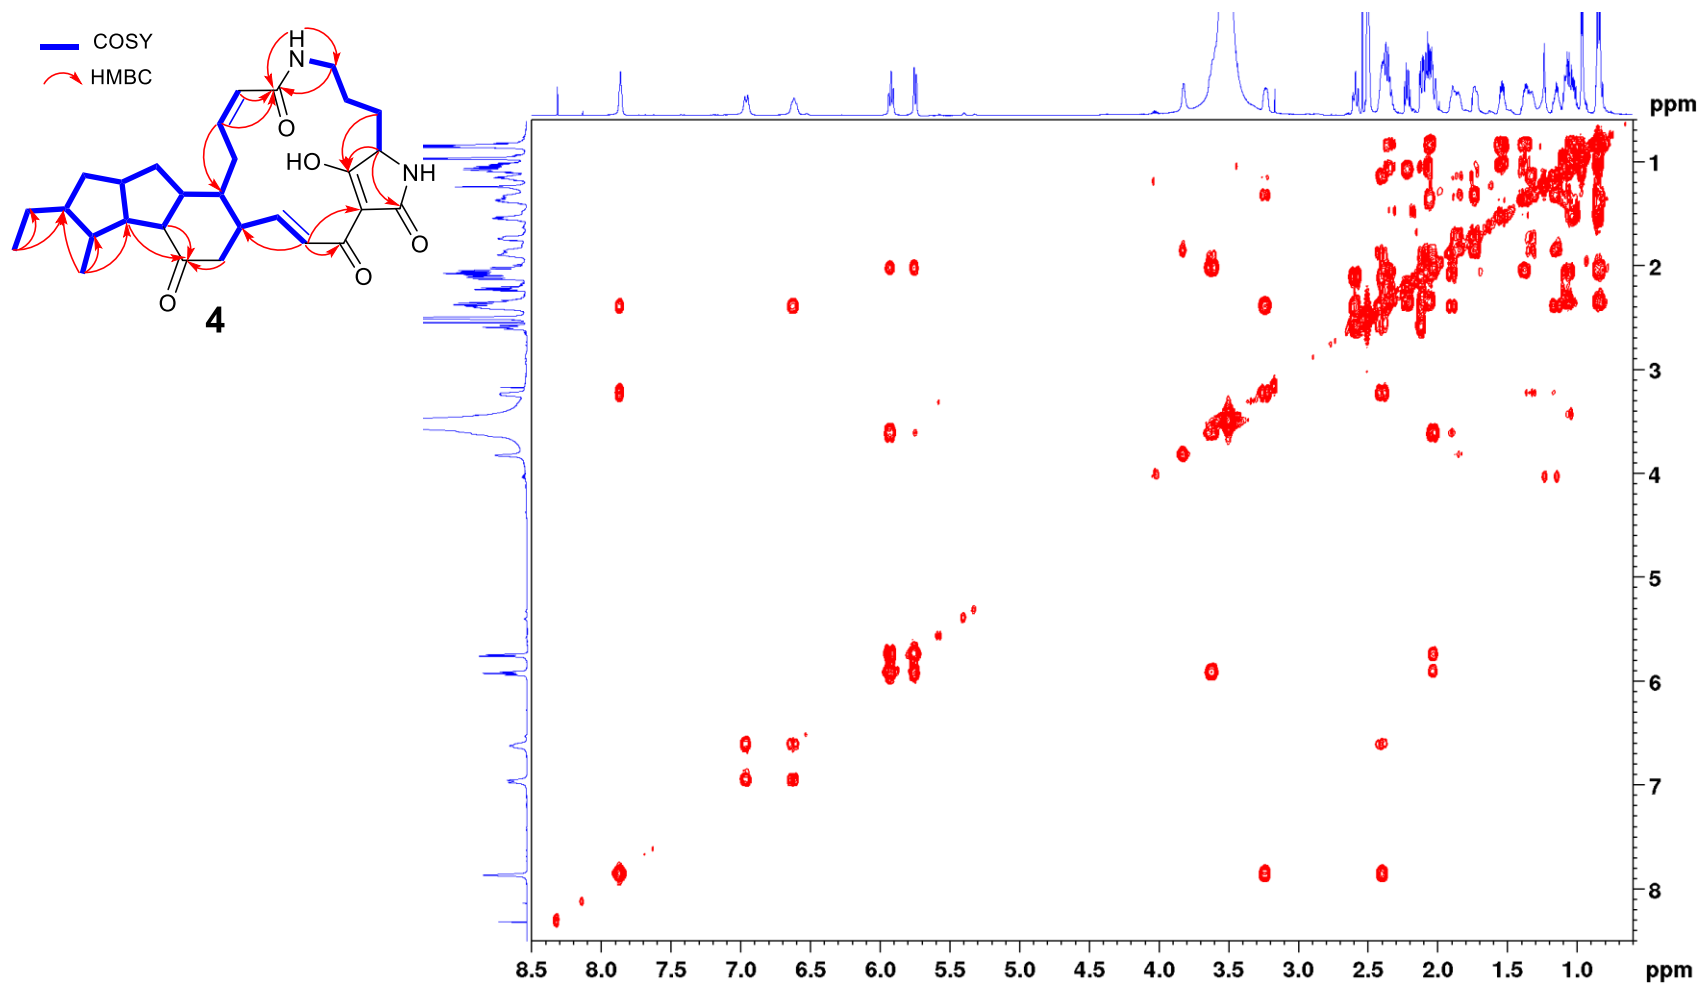

Figure S33. The NOESY spectrum of compound 4 in DMSO-*d*<sub>6</sub>.

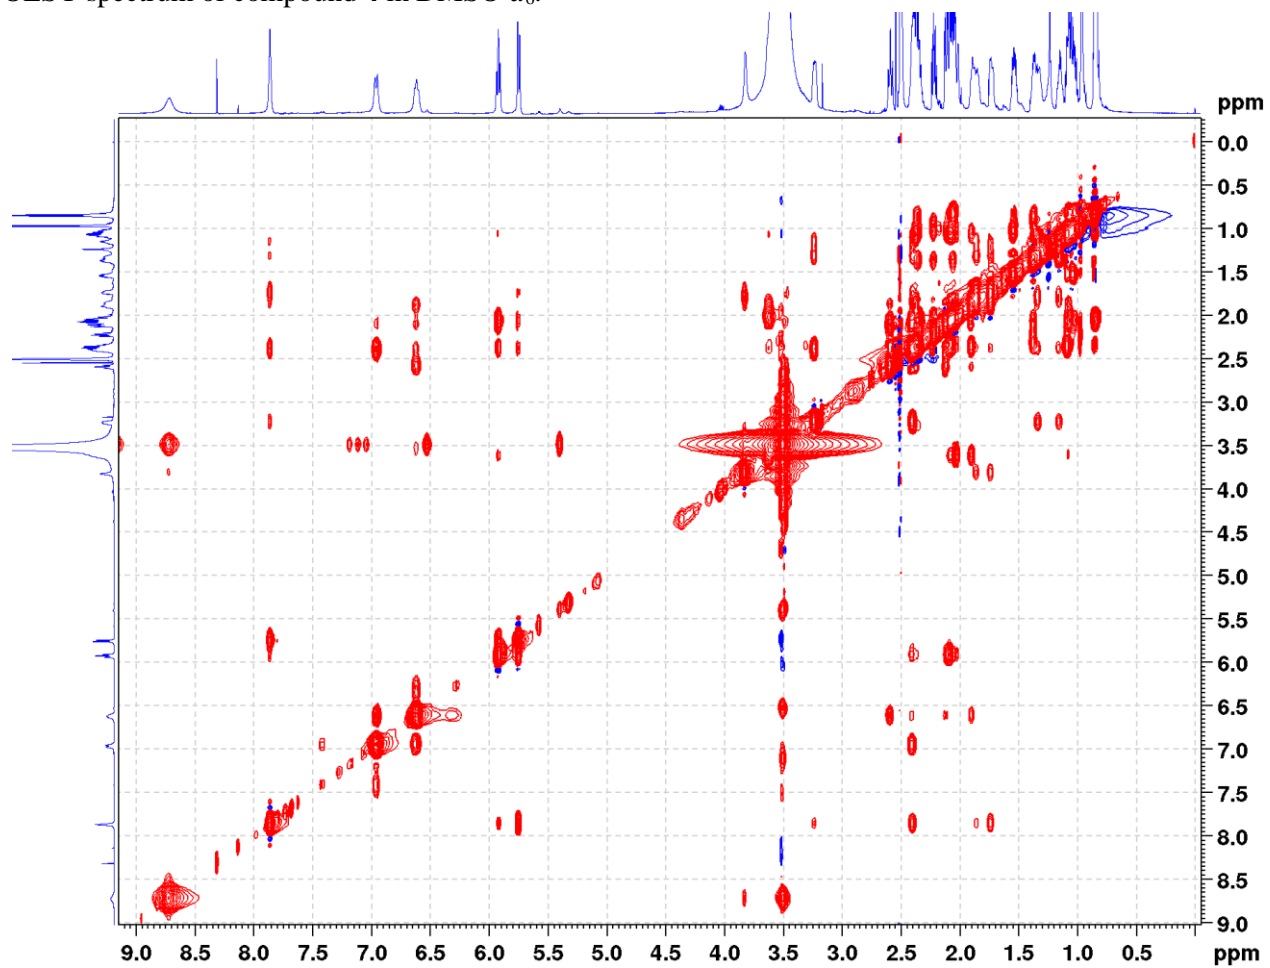

Figure S34. The key NOESY spectrum of compound 4 in DMSO-*d*<sub>6</sub>.

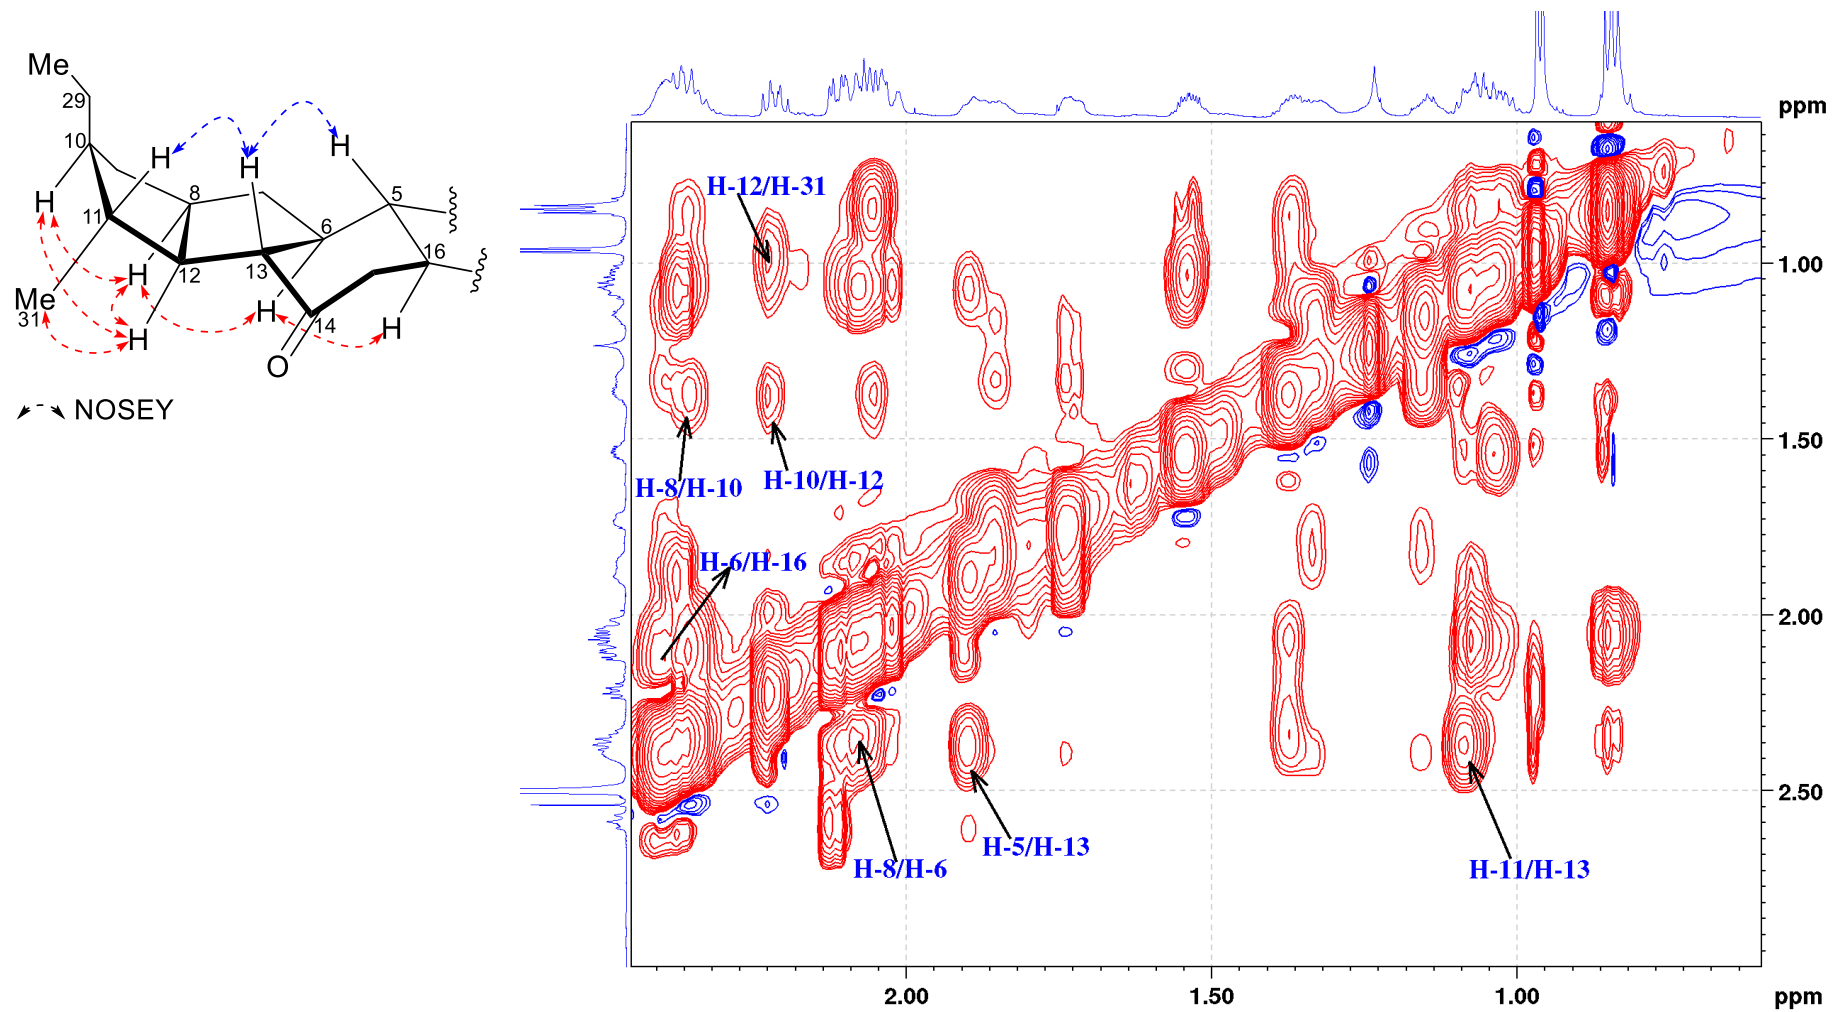

**Figure S35.** HRESIMS (a) and IR (b) of compound **5**.

**(a) HR-ESI-MS**

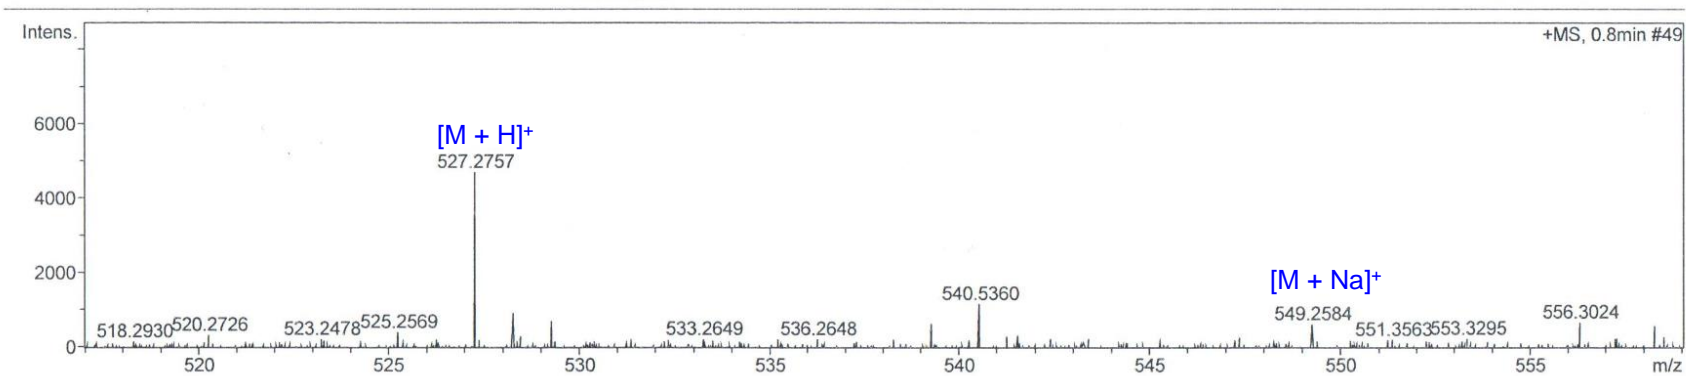

**(b) IR**

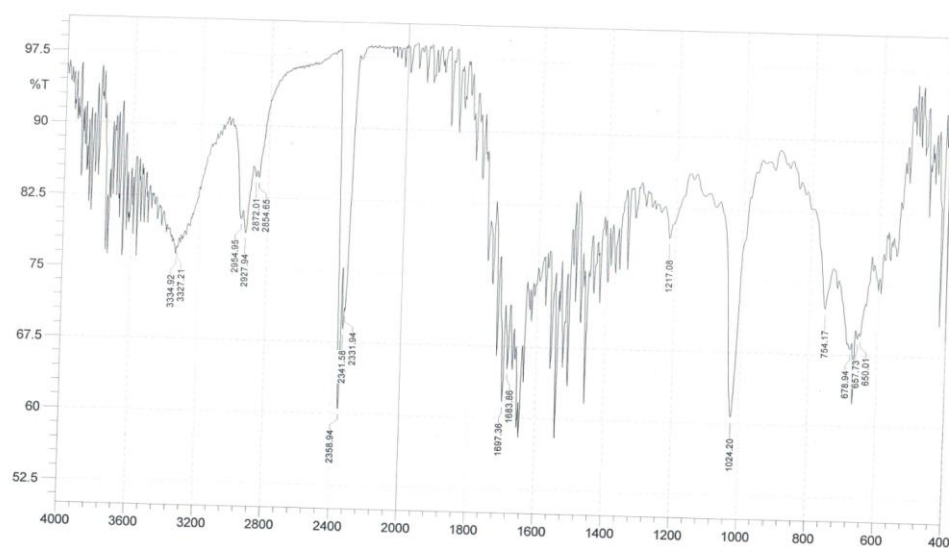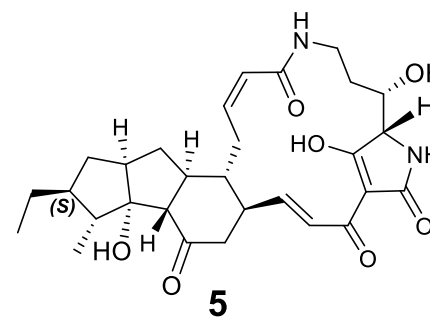

Chemical Formula: C<sub>29</sub>H<sub>38</sub>N<sub>2</sub>O<sub>7</sub>

calculated for [M+H]<sup>+</sup>: 527.2757

calculated for [M+H]<sup>+</sup>: 549.2577

Figure S36. The  $^1\text{H}$  NMR spectrum of compound **5** in  $\text{DMSO-}d_6$ .

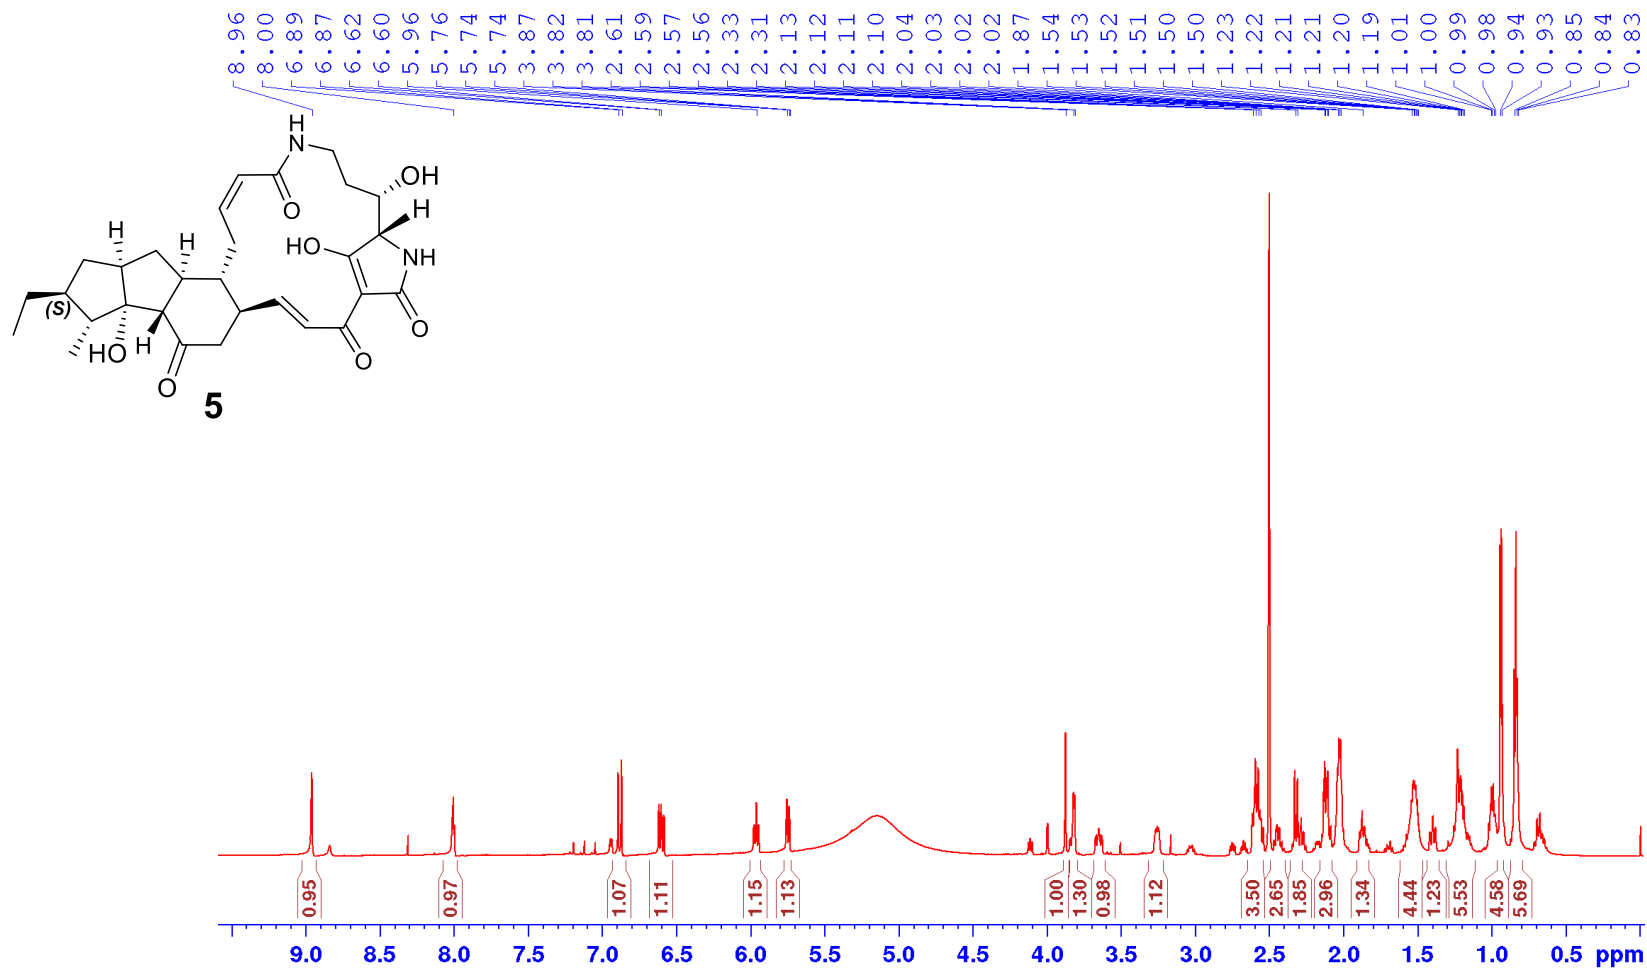

Figure S37. The  $^{13}\text{C}$  NMR and DEPT 135 spectra of compound **5** in  $\text{DMSO-}d_6$ .

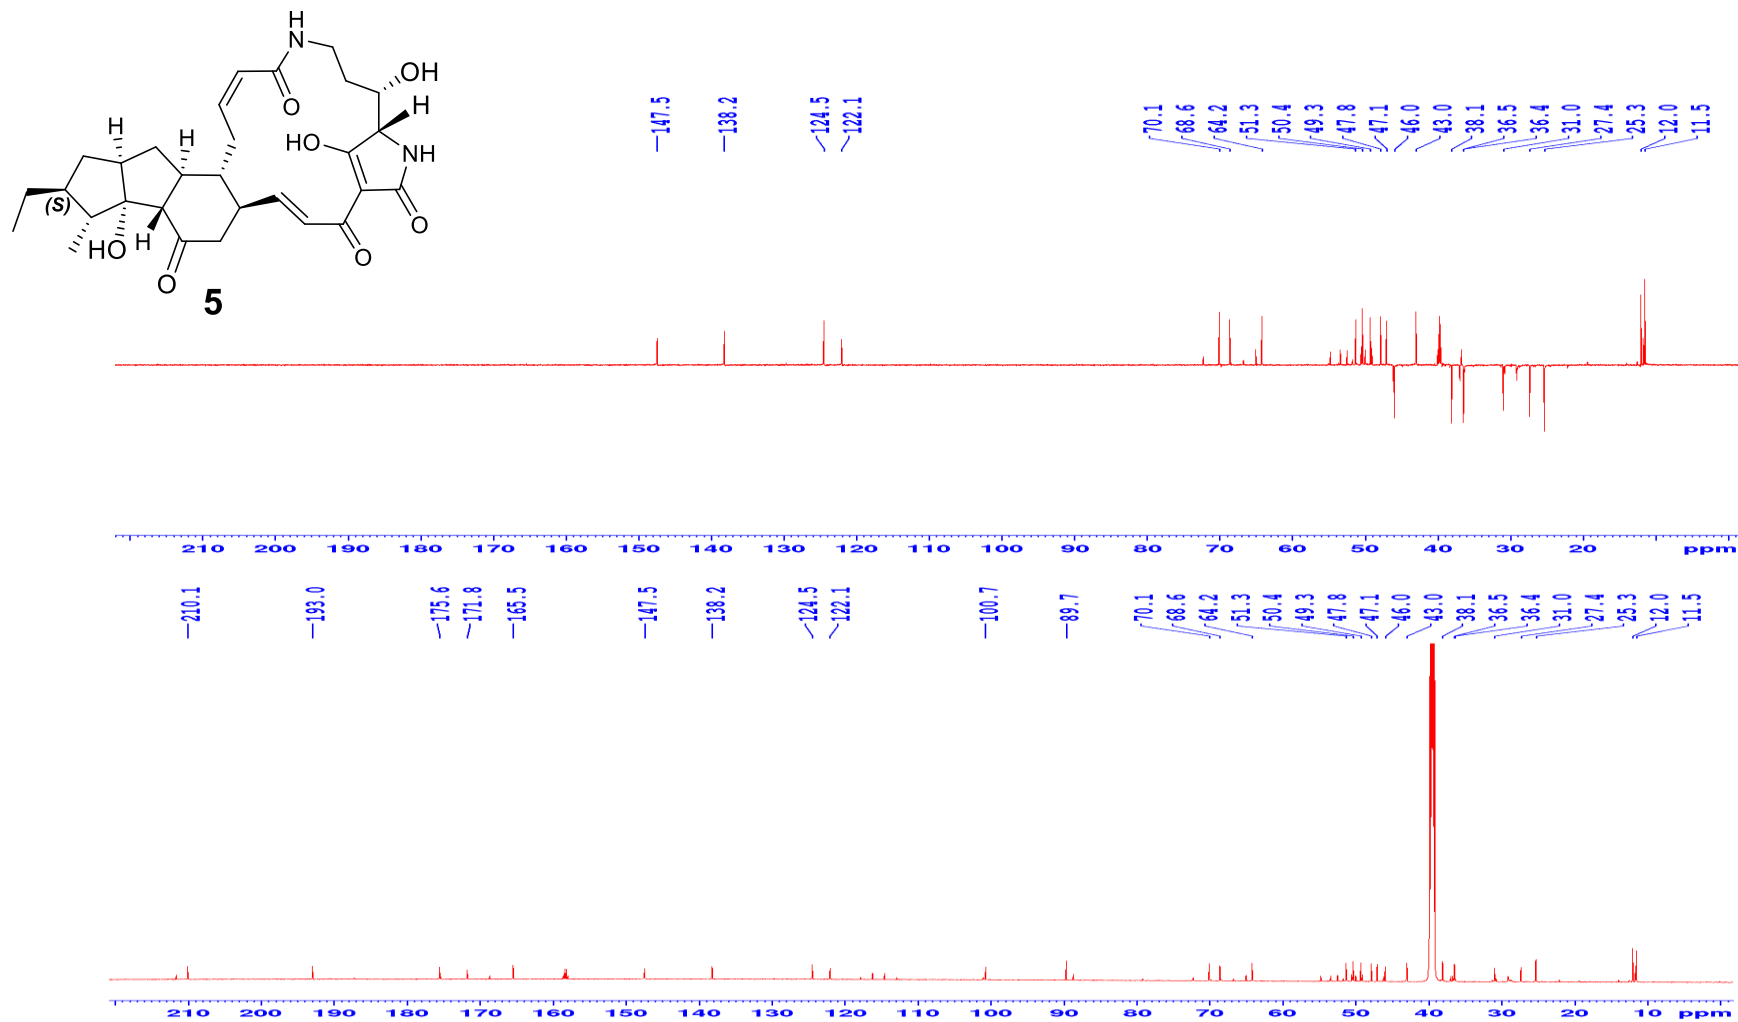



**Figure S38.** The HSQC spectrum of compound **5** in DMSO-*d*<sub>6</sub>.

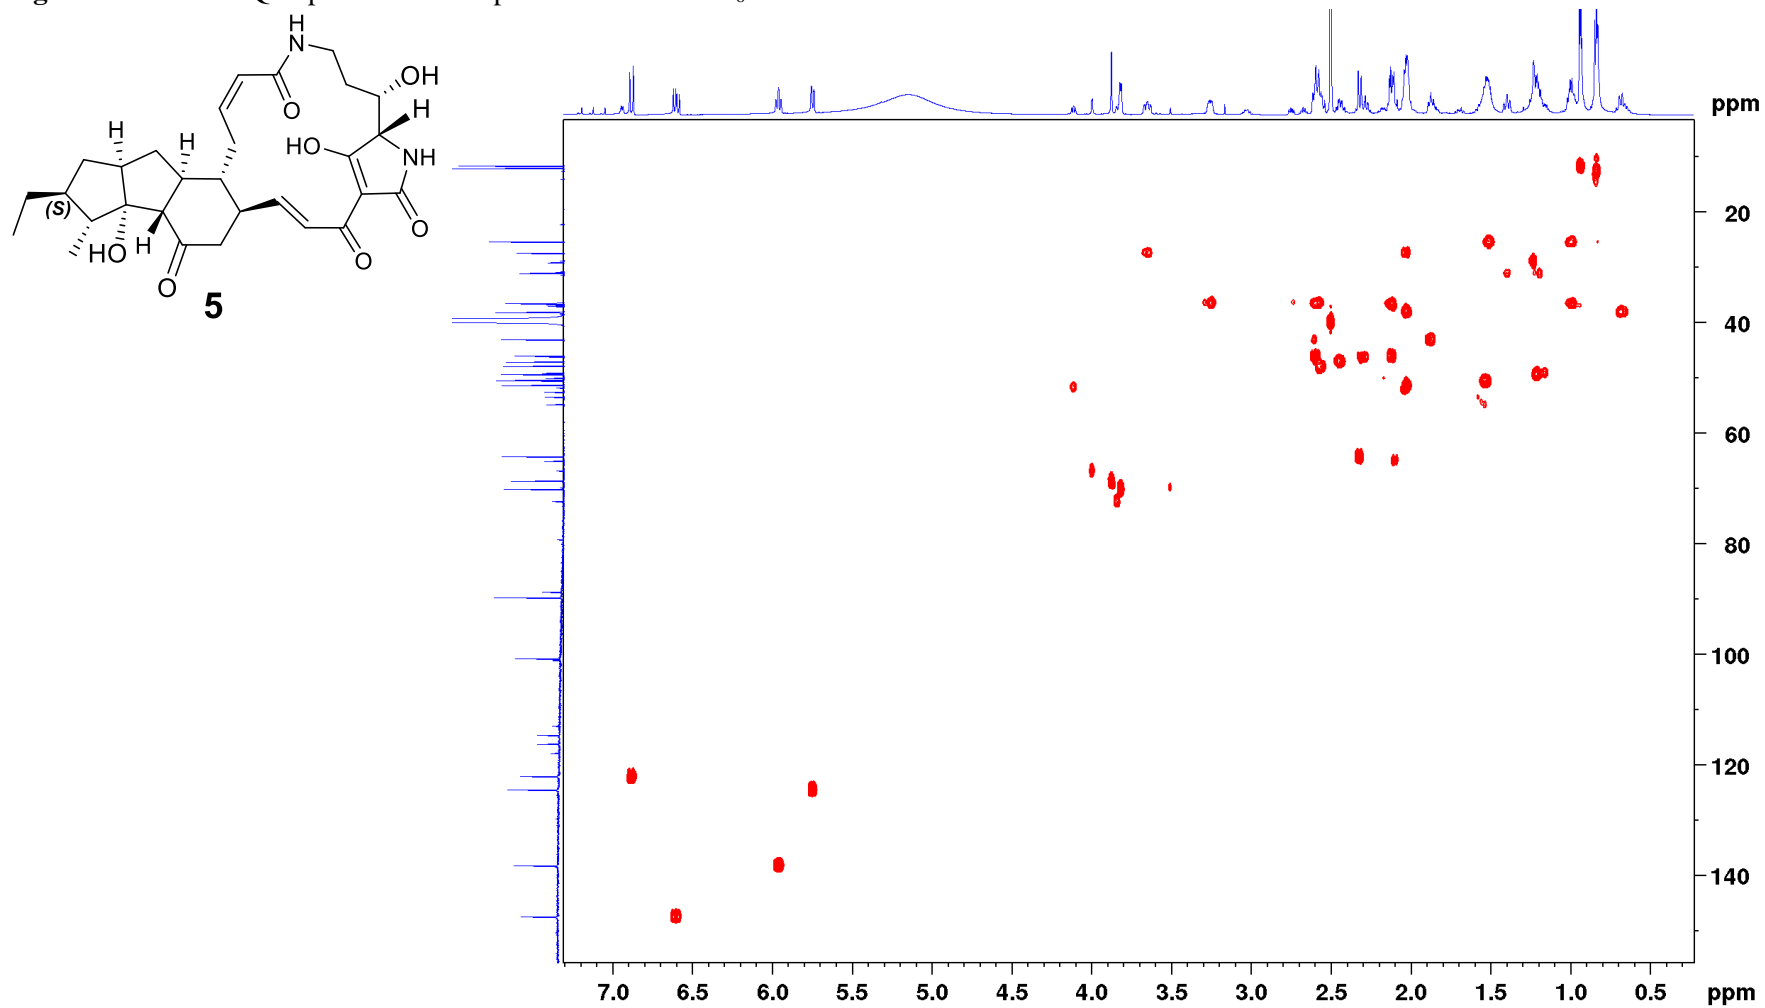

**Figure S39.** The HMBC spectrum of compound **5** in DMSO-*d*<sub>6</sub>.

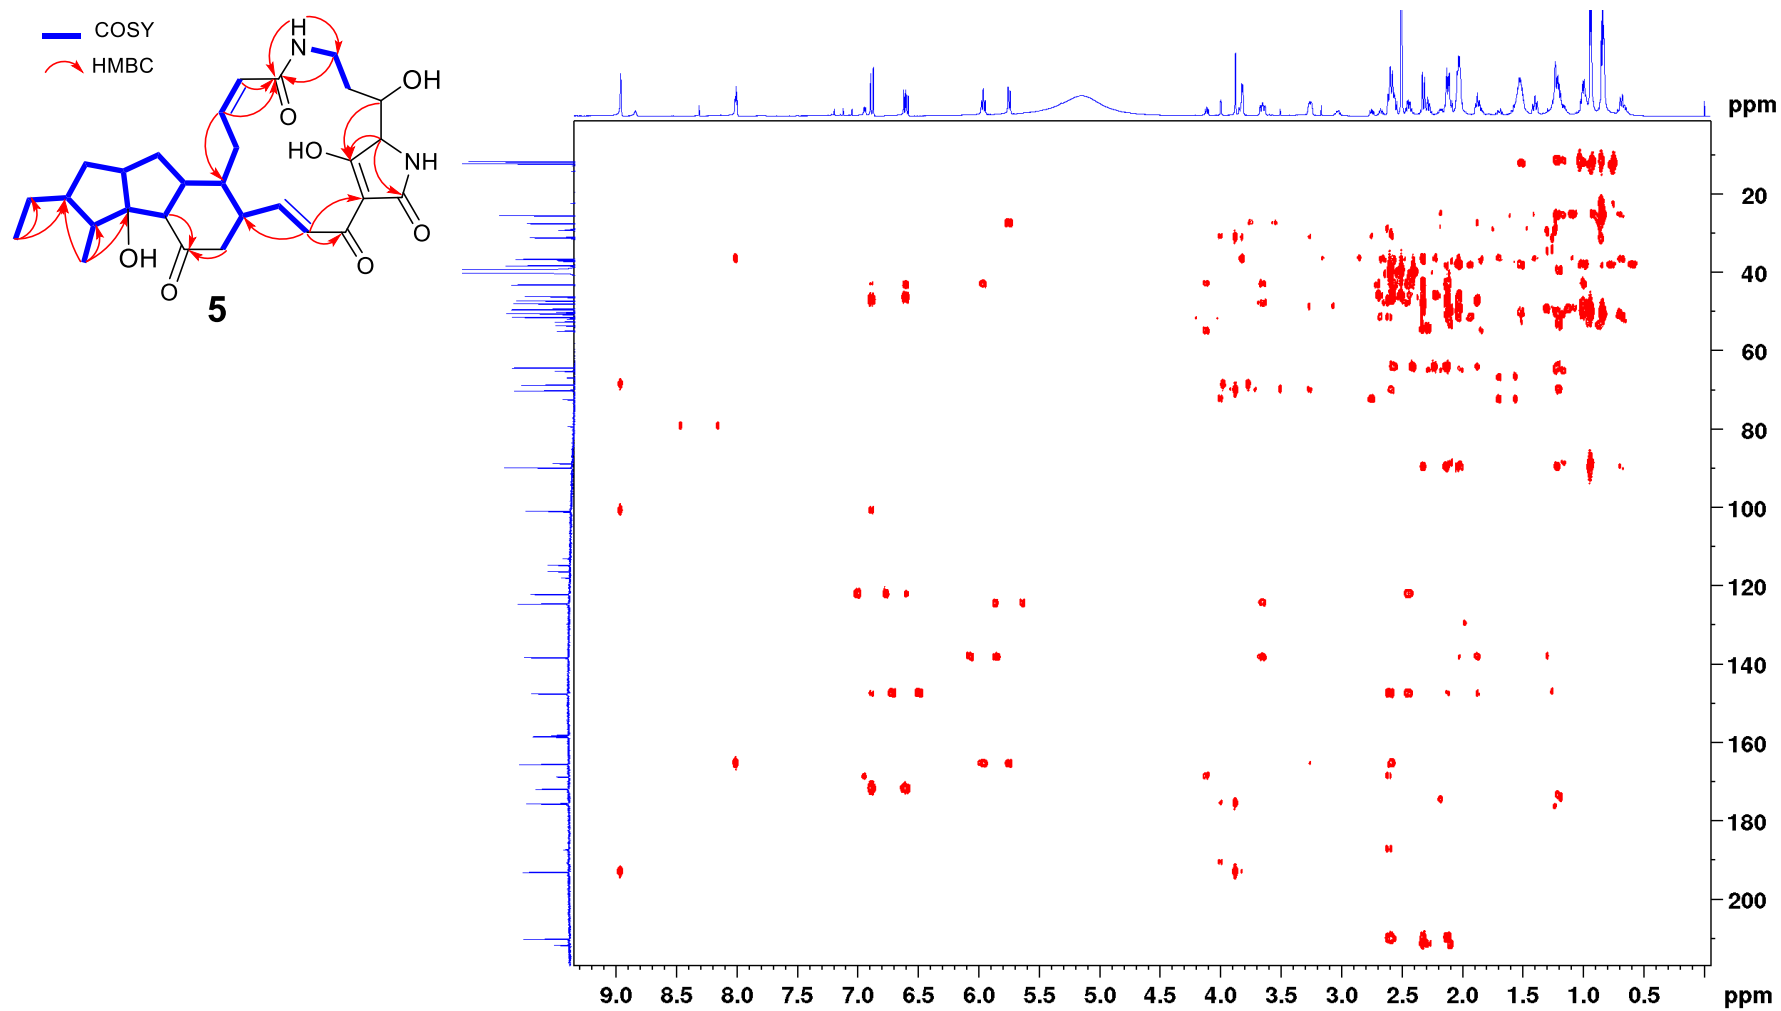

**Figure S40.** The  $^1\text{H}$ - $^1\text{H}$  COSY spectrum of compound **5** in  $\text{DMSO-}d_6$ .

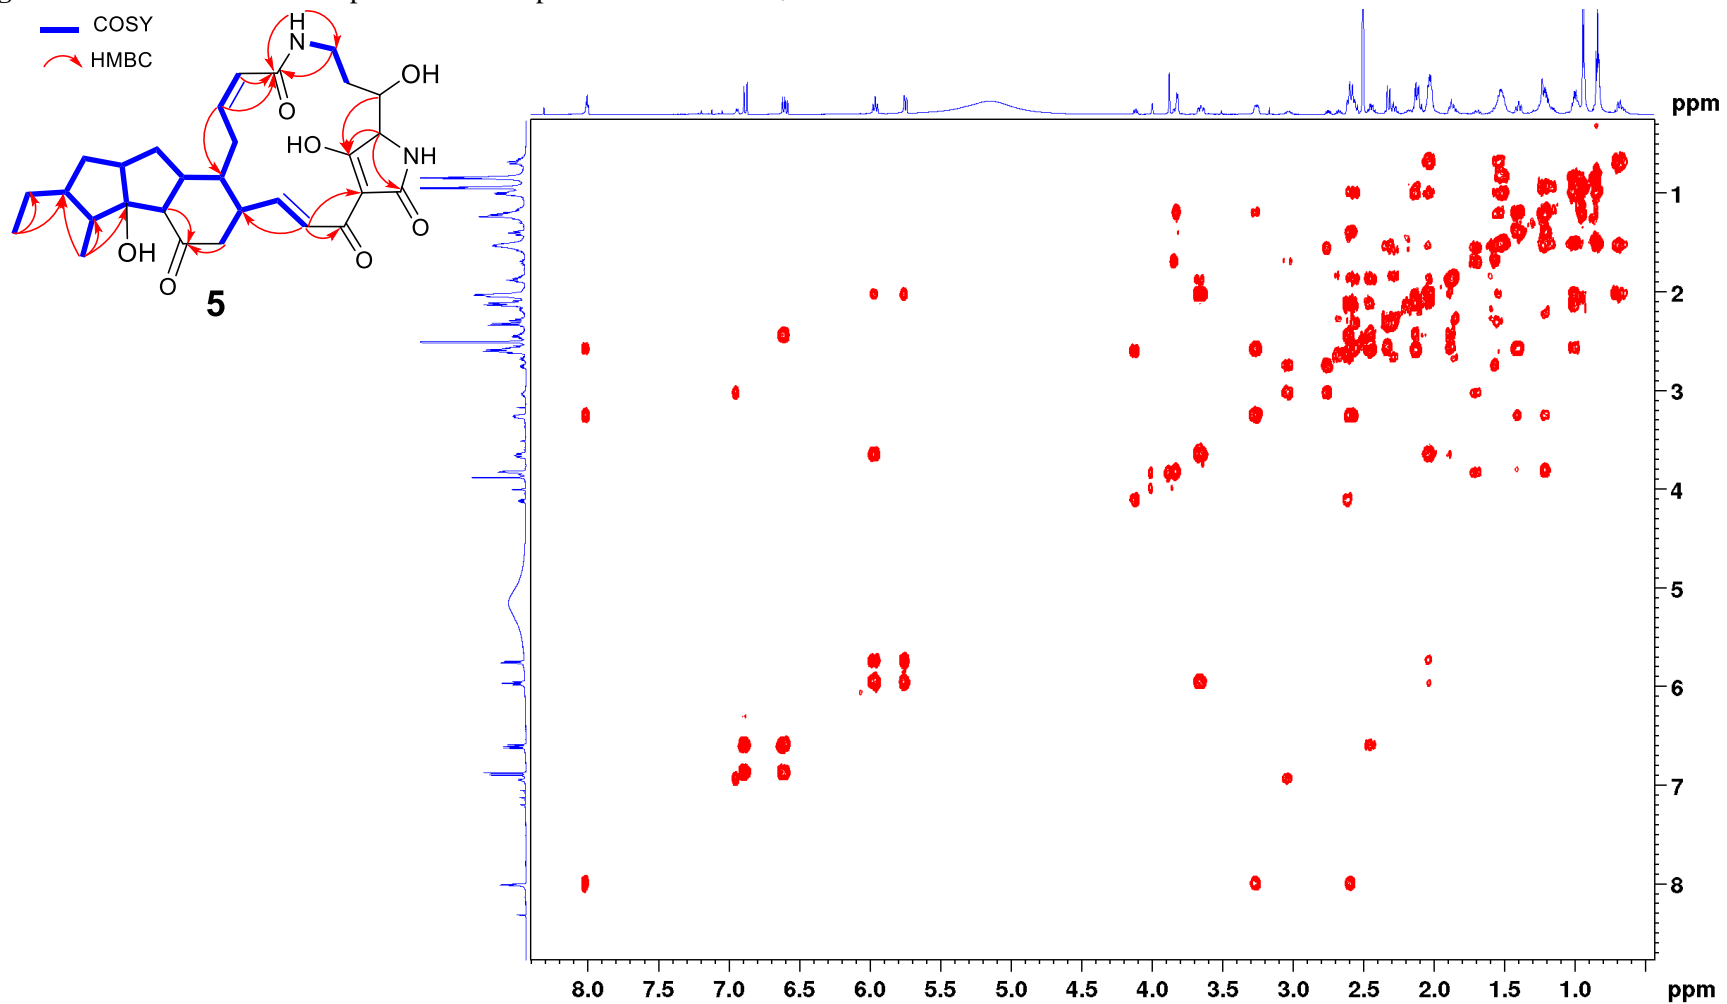

**Figure S41.** The NOESY spectrum of compound **5** in DMSO- $d_6$ .

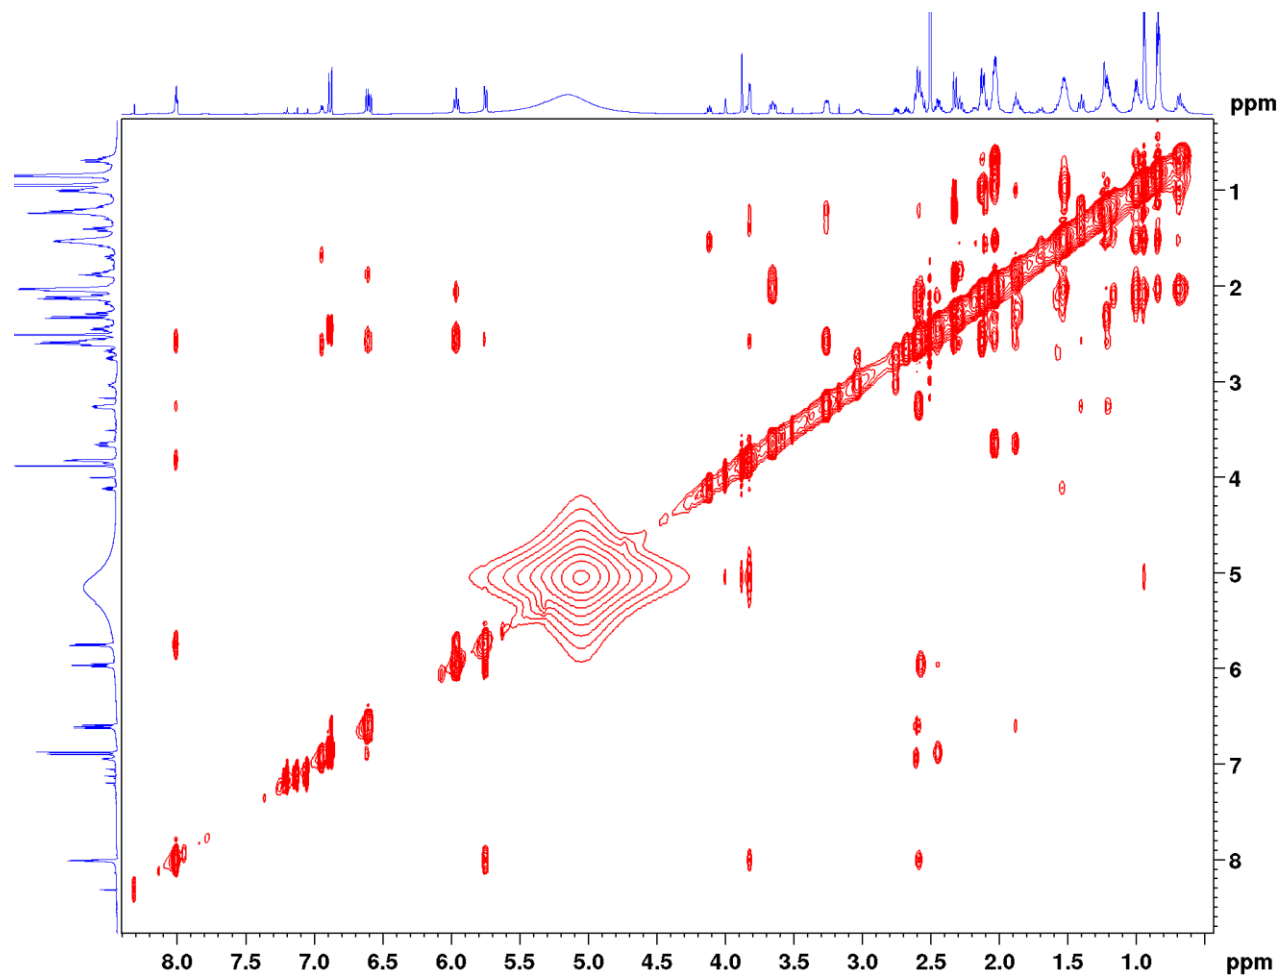

**Figure S42.** The key NOESY spectrum of compound **5** in DMSO-*d*<sub>6</sub>.

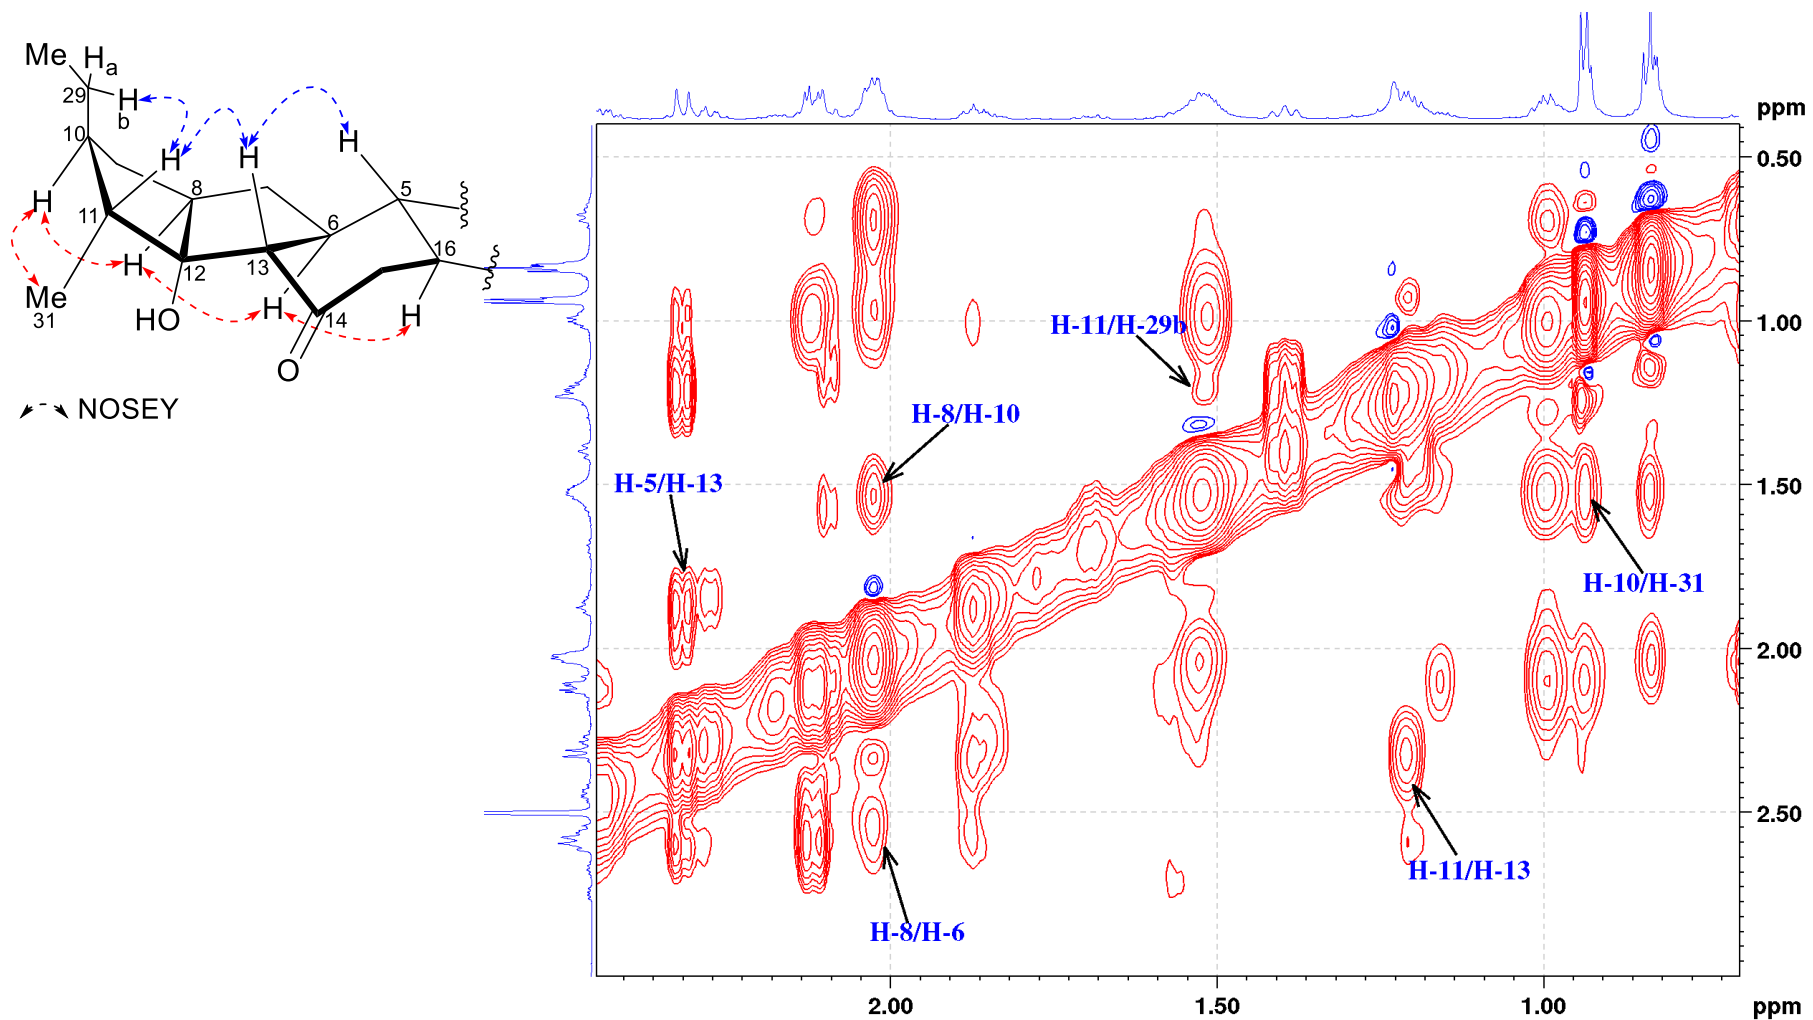

**Figure S43.** HRESIMS (a) and IR (b) of compound **6**.

**(a) HR-ESI-MS**

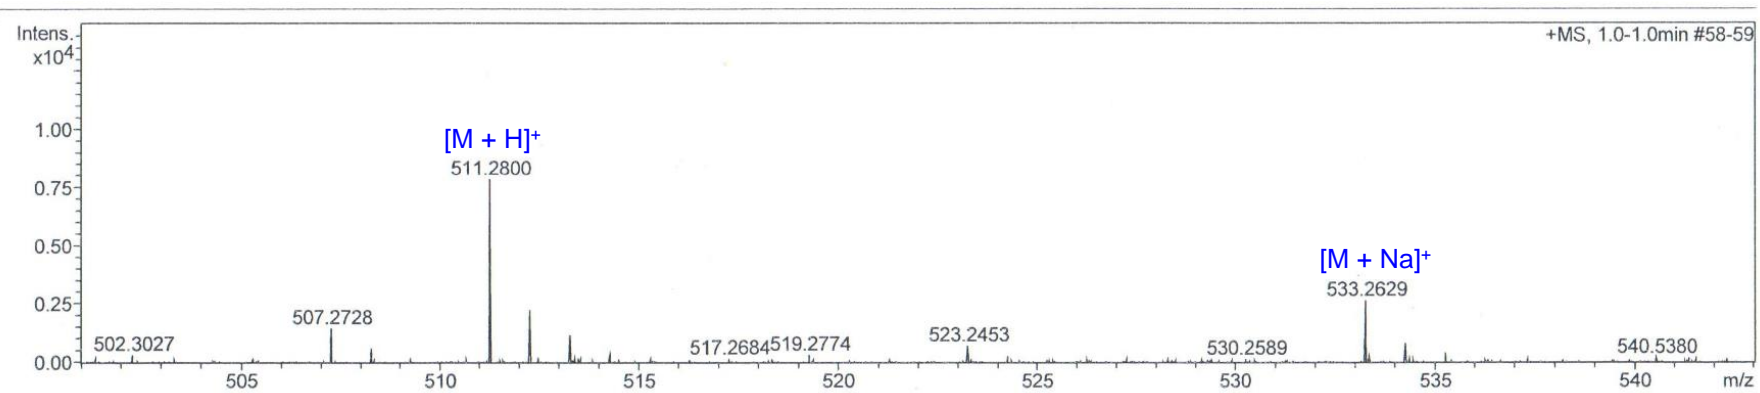

**(b) IR**

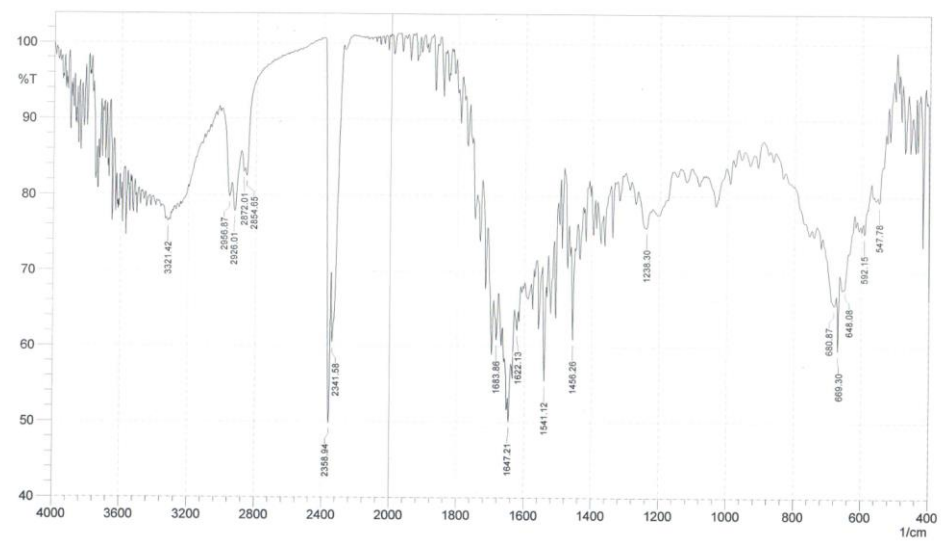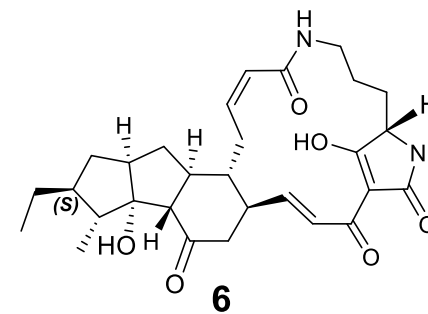

Chemical Formula:  $C_{29}H_{38}N_2O_6$   
 caculated for  $[M+H]^+$ : 511.2808  
 caculated for  $[M+Na]^+$ : 533.2628

**Figure S44.** The  $^1H$  NMR spectrum of compound **6** in  $DMSO-d_6$ .

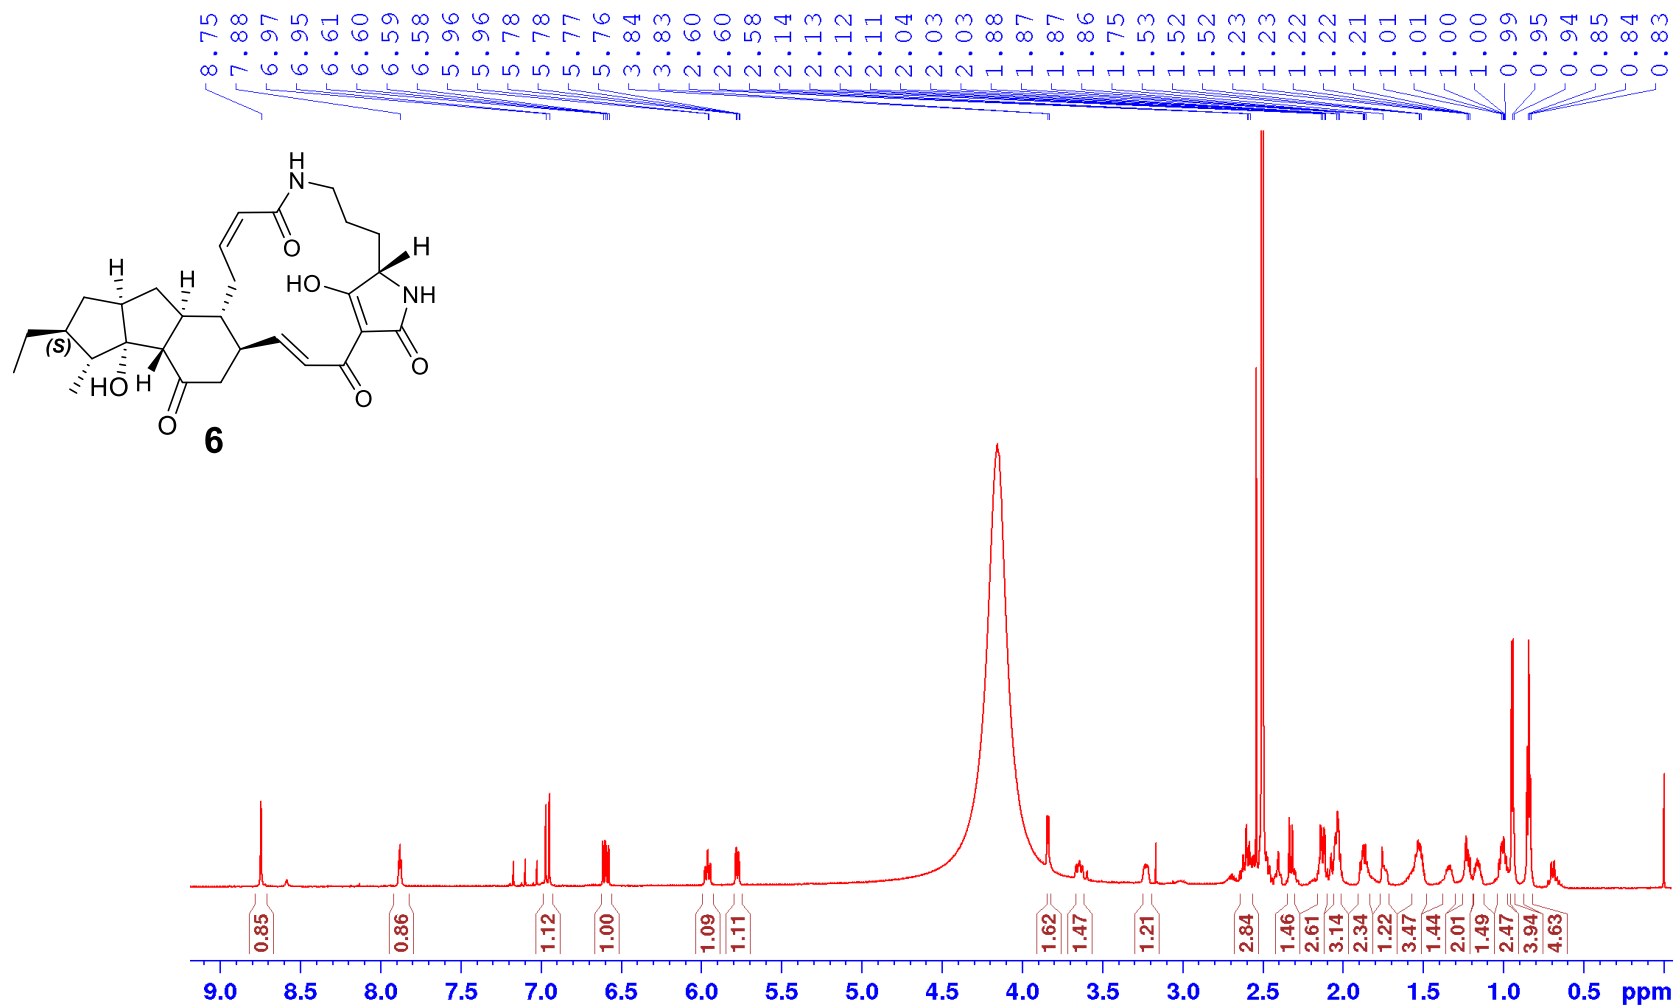

Figure S45. The  $^{13}\text{C}$  NMR and DEPT 135 spectra of compound **6** in  $\text{DMSO-}d_6$ .

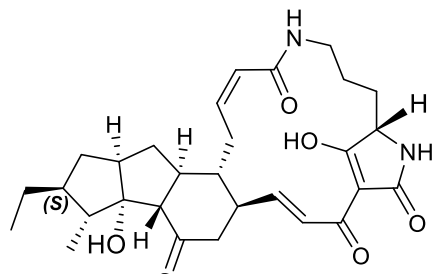



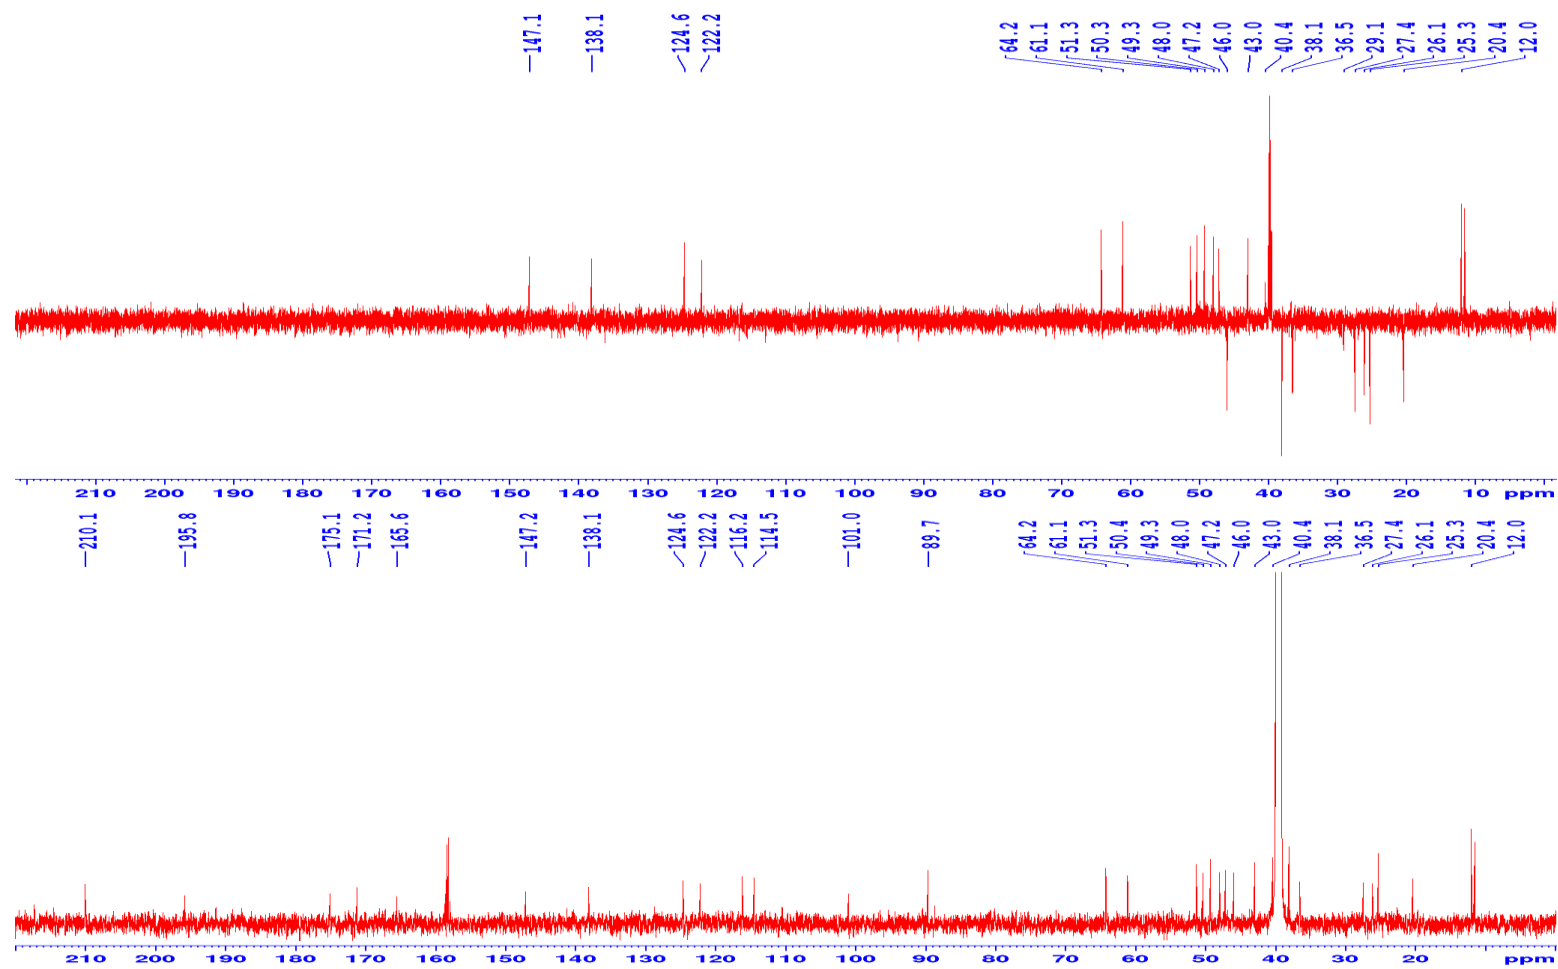

**Figure S46.** The HSQC spectrum of compound **6** in DMSO- $d_6$ .

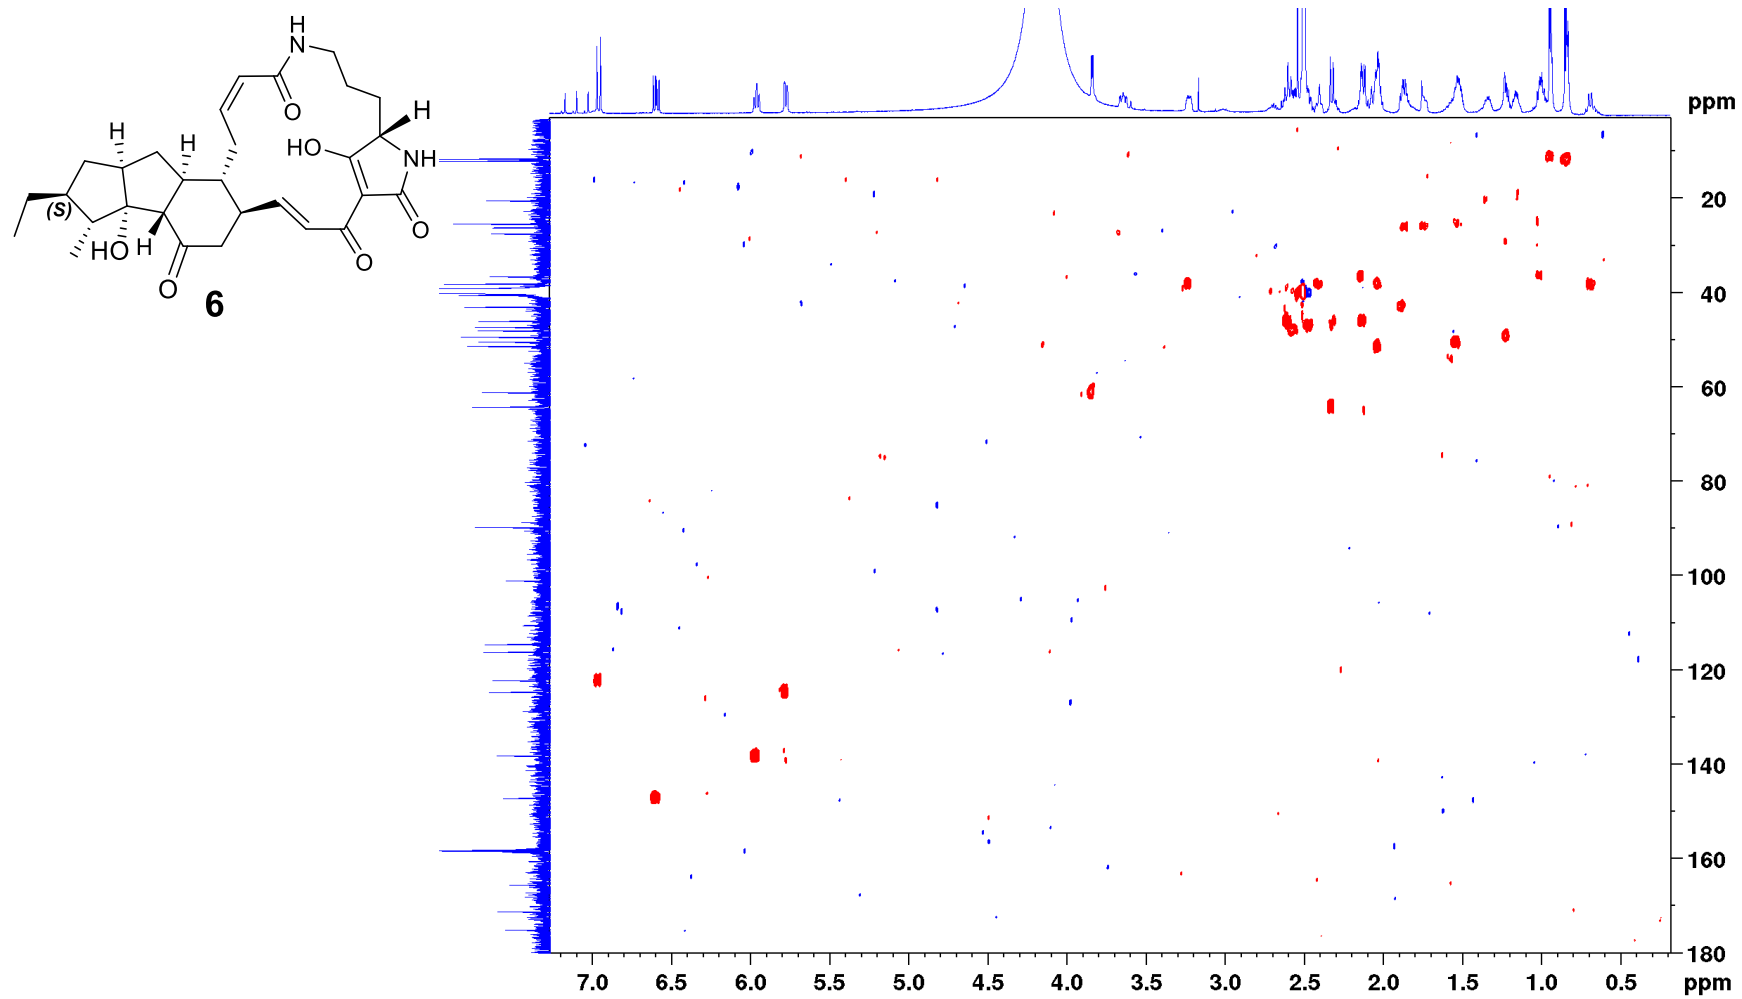

**Figure S47.** The HMBC spectrum of compound **6** in DMSO-*d*<sub>6</sub>.

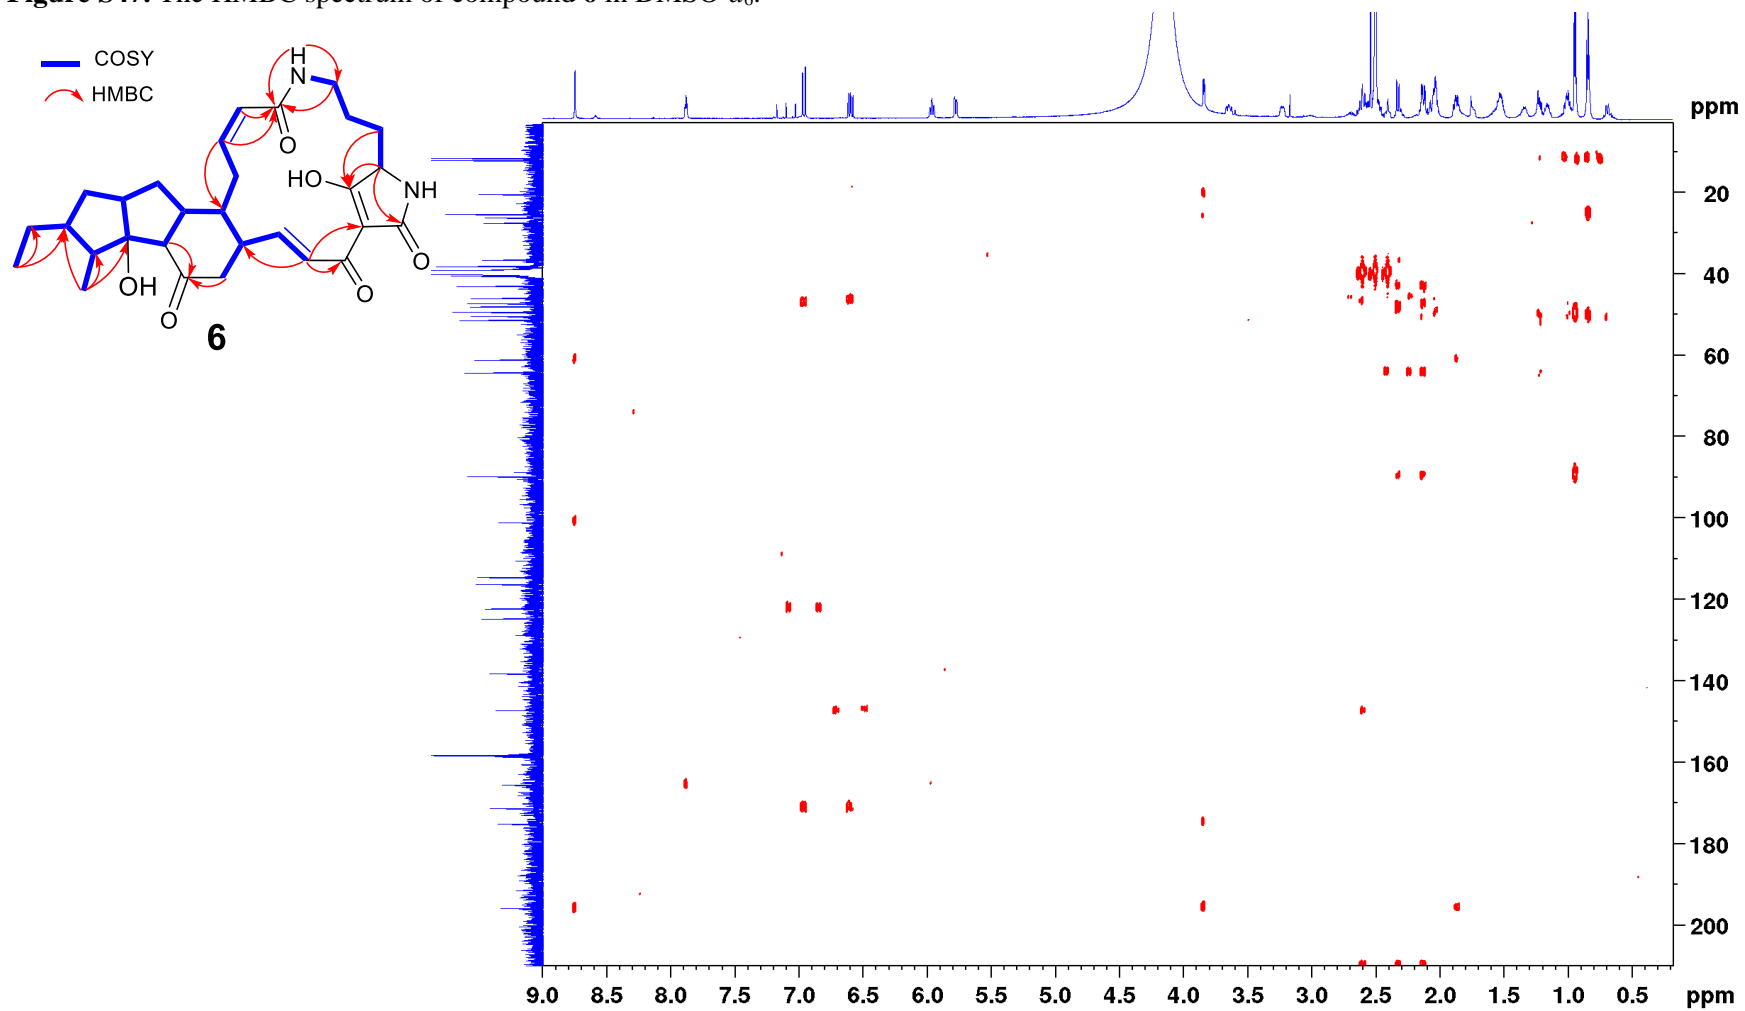

**Figure S48.** The  $^1\text{H}$ - $^1\text{H}$  COSY spectrum of compound **6** in  $\text{DMSO-}d_6$

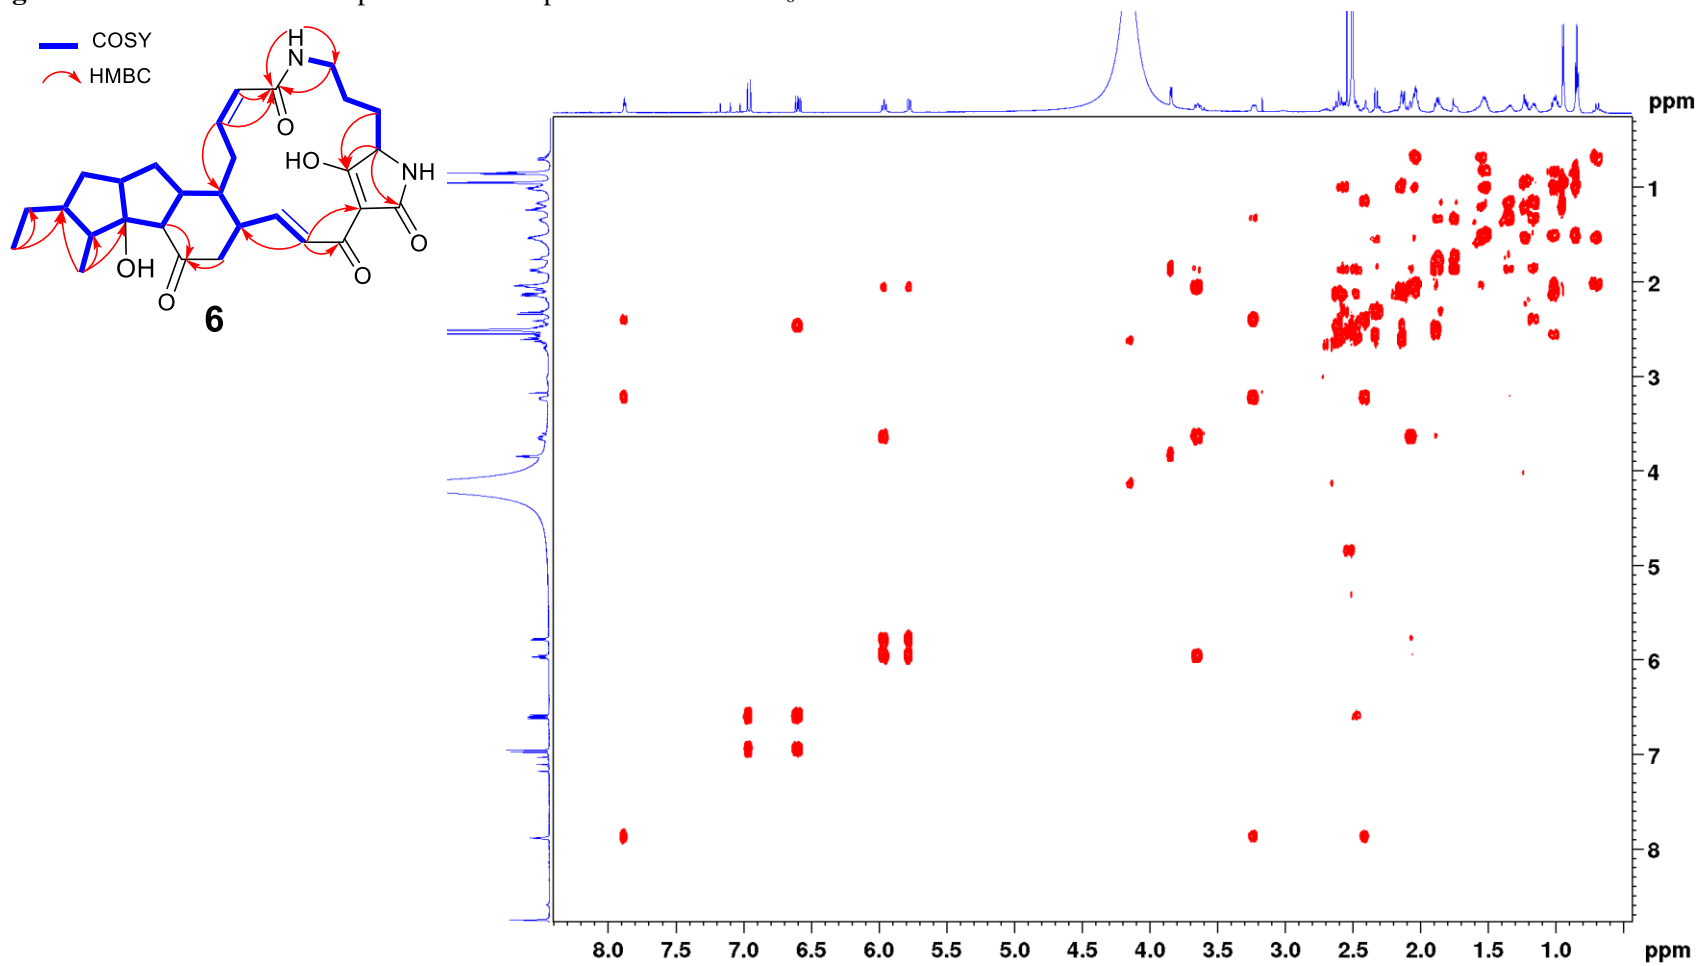

**Figure S49.** The NOESY spectrum of compound **6** in DMSO-*d*<sub>6</sub>.

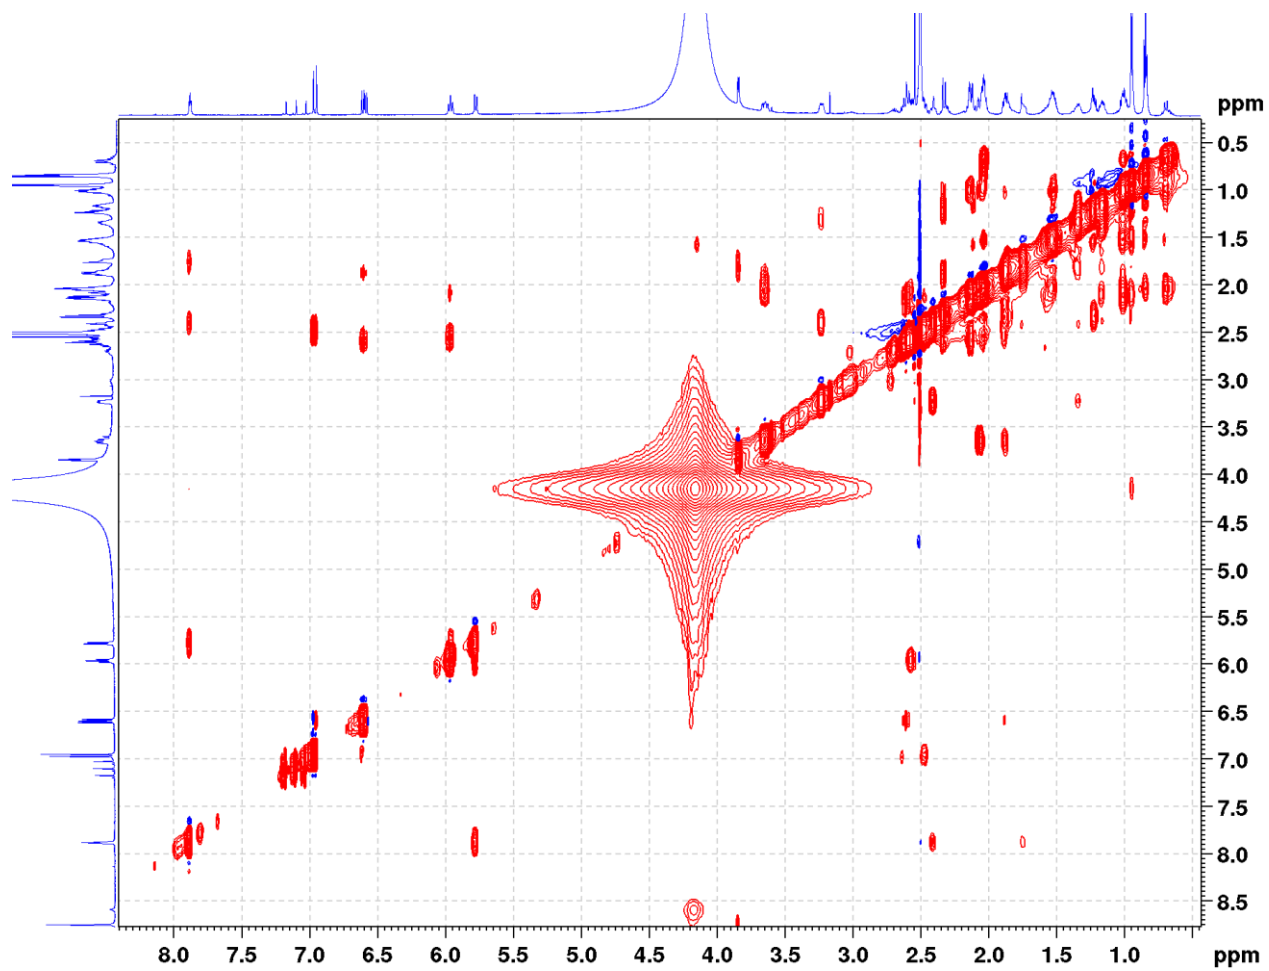

**Figure S50.** The key NOESY spectrum of compound **6** in DMSO-*d*<sub>6</sub>.

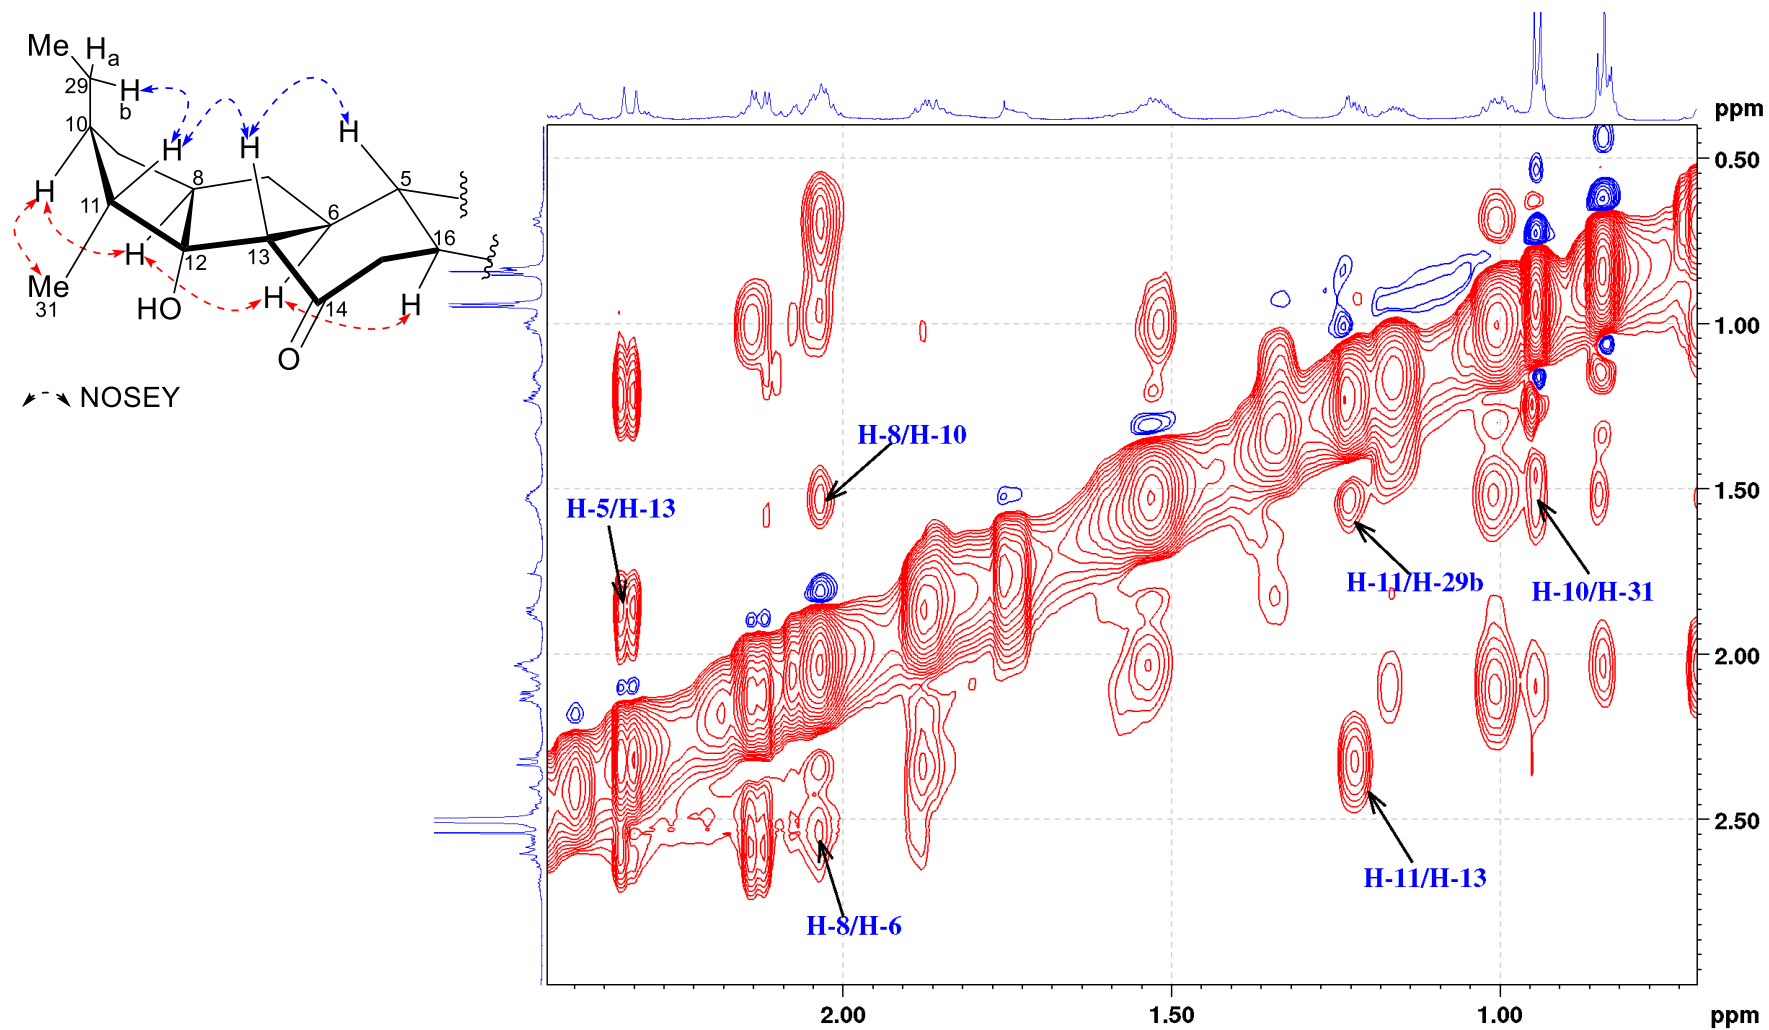

Supplement: marinedrugs-17-00663-s001.pdf [file marinedrugs-17-00663-s001.pdf]
